# Supplementary material for: Alteration in the cerebrospinal fluid lipidome in Parkinson´s disease: A pilot study
Source: Preprints.org preprint supplement (doi:10.20944/preprints202104.0324.v1), 2021-04-12
Supplement: Supplementary file 1 [file supplementary]

## Sheet: Raw data per metabolite_1
UNTRASFORMED DATA
	SAMPLE.ID	Group	AC02	AC04	AC11	BA03	BA05	BA06_BA07	BA15	BA16H	BA18	Cer_02	Cer_03	Cer_04	Cer_05	Cer_06	Cer_07	Cer_09	Cer_10_Cer_11	Cer_12	Cer_13	Cer_16	ChoE_07	ChoE_08	ChoE_12	ChoE_17	DAPC03	DAPC04	DAPC05	DAPC06	DAPC07	DAPC08	DAPC09	DAPC11	DAPC12	DAPC13	DAPC14	DAPC15	DAPC18	DAPC19	DAPC20	DAPC23	DAPC24	DAPC26	DAPC28	DAPC29	DAPC30	DAPC32	DAPC34
CLASS			Fatty esters	Fatty esters	Fatty esters	Bile acids	Bile acids	Bile acids	Bile acids	Bile acids	Bile acids	Sphingolipids	Sphingolipids	Sphingolipids	Sphingolipids	Sphingolipids	Sphingolipids	Sphingolipids	Sphingolipids	Sphingolipids	Sphingolipids	Sphingolipids	Sterols	Sterols	Sterols	Sterols	Glycerophospholipids	Glycerophospholipids	Glycerophospholipids	Glycerophospholipids	Glycerophospholipids	Glycerophospholipids	Glycerophospholipids	Glycerophospholipids	Glycerophospholipids	Glycerophospholipids	Glycerophospholipids	Glycerophospholipids	Glycerophospholipids	Glycerophospholipids	Glycerophospholipids	Glycerophospholipids	Glycerophospholipids	Glycerophospholipids	Glycerophospholipids	Glycerophospholipids	Glycerophospholipids	Glycerophospholipids	Glycerophospholipids
SUBCLASS A			Acylcarnitines	Acylcarnitines	Acylcarnitines	Primary bile acids	Primary bile acids		Glycine-conjugated bile acids	Glycine-conjugated bile acids	Glycine-conjugated bile acids	Ceramides	Ceramides	Ceramides	Ceramides	Ceramides	Ceramides	Ceramides	Ceramides	Ceramides	Ceramides	Ceramides	Cholesteryl Ester	Cholesteryl Ester	Cholesteryl Ester	Cholesteryl Ester	Diacylglycerophosphocholine	Diacylglycerophosphocholine	Diacylglycerophosphocholine	Diacylglycerophosphocholine	Diacylglycerophosphocholine	Diacylglycerophosphocholine	Diacylglycerophosphocholine	Diacylglycerophosphocholine	Diacylglycerophosphocholine	Diacylglycerophosphocholine	Diacylglycerophosphocholine	Diacylglycerophosphocholine	Diacylglycerophosphocholine	Diacylglycerophosphocholine	Diacylglycerophosphocholine	Diacylglycerophosphocholine	Diacylglycerophosphocholine	Diacylglycerophosphocholine	Diacylglycerophosphocholine	Diacylglycerophosphocholine	Diacylglycerophosphocholine	Diacylglycerophosphocholine	Diacylglycerophosphocholine
SUBCLASS B												CER[NS]	CER[NS]	CER[NS]	CER[NS]	CER[NS]	CER[NS]	CER[NS]	CER[NS]	CER[NS]	CER[NS]	CER[NS]
SUBCLASS C												Sphingoid base d18:1	Sphingoid base d18:1	Sphingoid base d18:1	Sphingoid base d18:1	Mixed sphingoid base	Sphingoid base d18:1	Sphingoid base d18:1	Mixed sphingoid base	Mixed sphingoid base	Sphingoid base d18:1	Sphingoid base d18:1
COMMON NAME OR FUNCTION			L-Octanoylcarnitine	Decanoylcarnitine	Oleoylcarnitine	CA (31% bile)	CDCA (45% bile)	UDCA + HDCA	GCA	GCDCA	GDCA
INDIVIDUAL NOTATION			AC(8:0)	AC(10:0)	AC(18:1n-9)	Cholic acid	Chenodeoxycholic acid	Ursodeoxycholic + Hyodeoxycholic acid	Glycocholic acid	Glycochenodeoxycholic acid	Glycodeoxycholic acid	Cer(d18:1/16:0)	Cer(d18:1/20:0)	Cer(d18:1/21:0)	Cer(d18:1/22:0)	Cer(40:2)	Cer(d18:1/23:0)	Cer(d18:1/24:0)	Cer(d18:1/24:1)+Cer(d18:2/24:0)	Cer(42:3)	Cer(d18:1/18:0)	Cer(d18:1/19:0)	ChoE(18:1)	ChoE(18:2)	ChoE(20:4)	ChoE(22:6)	PC(16:0/16:0)	PC(32:1)	PC(14:0/18:2)	PC(16:0/18:0)	PC(16:0/18:1)	PC(16:0/18:2)	PC(14:0/20:4)	PC(18:0/18:1)	PC(18:0/18:2)	PC(18:2/18:2)	PC(16:0/20:4)	PC(16:0/20:5)	PC(18:0/20:3)	PC(18:0/20:4)	PC(38:5)	PC(18:2/20:4)	PC(16:0/22:6)	PC(18:0/22:4)	PC(40:5)	PC(18:0/22:5)	PC(18:0/22:6)	PC(18:1/22:6)	PC(40:8)
INDIVIDUAL COMPOSITION OR PROBABLE ID																												PC(16:0/16:1) + PC(14:1/18:0) + PC(14:0/18:1)													PC(18:1/20:4) + PC(16:0/22:5)								PC(20:4/20:4) + PC(18:2/22:6) + PC(18:0/22:8)
SIMPLIFIED NAME			AC	AC	AC	BA	BA	BA	BA	BA	BA	Cer	Cer	Cer	Cer	Cer	Cer	Cer	Cer	Cer	Cer	Cer	ChoE	ChoE	ChoE	ChoE	PC_DAPC	PC_DAPC	PC_DAPC	PC_DAPC	PC_DAPC	PC_DAPC	PC_DAPC	PC_DAPC	PC_DAPC	PC_DAPC	PC_DAPC	PC_DAPC	PC_DAPC	PC_DAPC	PC_DAPC	PC_DAPC	PC_DAPC	PC_DAPC	PC_DAPC	PC_DAPC	PC_DAPC	PC_DAPC	PC_DAPC
SIMPLE NAME			AC	AC	AC	BA	BA	BA	BA	BA	BA	Cer	Cer	Cer	Cer	Cer	Cer	Cer	Cer	Cer	Cer	Cer	ChoE	ChoE	ChoE	ChoE	PC	PC	PC	PC	PC	PC	PC	PC	PC	PC	PC	PC	PC	PC	PC	PC	PC	PC	PC	PC	PC	PC	PC
HMDB			HMDB00791	HMDB00651	HMDB05065	HMDB00619	HMDB00518	HMDB00946	HMDB00138	HMDB00637	HMDB00631	HMDB04949	HMDB04951		HMDB04952		HMDB00950	HMDB04956			HMDB04950		HMDB00918	HMDB00610	HMDB06726	HMDB06733	HMDB00564		HMDB07874	HMDB07970	HMDB07972	HMDB07973	HMDB07883	HMDB08038	HMDB08039	HMDB08138	HMDB07982	HMDB07984	HMDB08046	HMDB08048		HMDB08147	HMDB07991	HMDB08054		HMDB08056	HMDB08057	HMDB08123
KEGG			C02838			C00695	C02528	C07880	C01921	C05466	C05464	C00195	C00195		C00195			C00195			C00195		C14641	C15441	C02530	C02530	C00157		C00157	C00157	C00157	C00157	C00157	C00157	C00157	C00157	C00157	C00157	C00157	C00157		C00157	C00157	C00157		C00157	C00157	C00157
CHEMICAL FORMULA			C15H29NO4	C17H33NO4	C25H47NO4	C24H40O5	C24H40O4	C24H40O4	C26H43NO6	C26H43NO5	C26H43NO5	C34H67NO3	C38H75NO3		C40H79NO3		C41H81NO3	C42H83NO3			C36H71NO3		C45H78O2	C45H76O2	C47H76O2	C49H76O2	C40H80NO8P		C40H76NO8P	C42H84NO8P	C42H82NO8P	C42H80NO8P	C42H76NO8P	C44H86NO8P	C44H84NO8P	C44H80NO8P	C44H80NO8P	C44H78NO8P	C46H86NO8P	C46H84NO8P		C46H80NO8P	C46H80NO8P	C48H88NO8P		C48H86NO8P	C48H84NO8P	C48H82NO8P
COMMON NAME			L-Octanoylcarnitine	Decanoylcarnitine	Oleoylcarnitine	Cholic acid	Chenodeoxycholic acid	Ursodeoxycholic acid	Glycocholic acid	Chenodeoxycholic acid glycine conjugate	Deoxycholic acid glycine conjugate	Ceramide (d18:1/16:0)	Ceramide (d18:1/20:0)		Ceramide (d18:1/22:0)		Cer(d18:1/23:0)	Ceramide (d18:1/24:0)			Ceramide (d18:1/18:0)		CE(18:1(9Z))	CE(18:2(9Z,12Z))	CE(20:4(5Z,8Z,11Z,14Z)	CE(22:6(4Z,7Z,10Z,13Z,16Z,19Z))	PC(16:0/16:0)		PC(14:0/18:2(9Z,12Z))	PC(16:0/18:0)	PC(16:0/18:1(9Z))	PC(16:0/18:2(9Z,12Z))	PC(14:0/20:4(5Z,8Z,11Z,14Z))	PC(18:0/18:1(9Z))	PC(18:0/18:2(9Z,12Z))	PC(18:2(9Z,12Z)/18:2(9Z,12Z))	PC(16:0/20:4(5Z,8Z,11Z,14Z))	PC(16:0/20:5(5Z,8Z,11Z,14Z,17Z))	PC(18:0/20:3(5Z,8Z,11Z))	PC(18:0/20:4(5Z,8Z,11Z,14Z))		PC(18:2(9Z,12Z)/20:4(5Z,8Z,11Z,14Z))	PC(16:0/22:6(4Z,7Z,10Z,13Z,16Z,19Z))	PC(18:0/22:4(7Z,10Z,13Z,16Z))		PC(18:0/22:5(7Z,10Z,13Z,16Z,19Z))	PC(18:0/22:6(4Z,7Z,10Z,13Z,16Z,19Z))	PC(18:1(9Z)/22:6(4Z,7Z,10Z,13Z,16Z,19Z))
BIOFUNCTION			Cell signaling	Cell signaling	Cell signaling	Cell signaling	Cell signaling	Cell signaling	Cell signaling	Cell signaling	Cell signaling	Cell signaling	Cell signaling		Cell signaling		Cell signaling	Cell signaling			Cell signaling		Cell signaling	Cell signaling	Cell signaling	Cell signaling	Cell signaling		Cell signaling	Cell signaling	Cell signaling	Cell signaling	Cell signaling	Cell signaling	Cell signaling	Cell signaling	Cell signaling	Cell signaling	Cell signaling	Cell signaling		Cell signaling	Cell signaling	Cell signaling		Cell signaling	Cell signaling	Cell signaling
CLASS (HMDB)			Fatty Acid Esters	Fatty Acid Esters	Fatty Acid Esters	Steroids and Steroid Derivatives	Steroids and Steroid Derivatives	Steroids and Steroid Derivatives	Steroids and Steroid Derivatives	Steroids and Steroid Derivatives	Steroids and Steroid Derivatives	Sphingolipids	Sphingolipids		Sphingolipids		Sphingolipids	Sphingolipids			Sphingolipids		Steroids and Steroid Derivatives	Steroids and Steroid Derivatives	Steroids and Steroid Derivatives	Steroids and Steroid Derivatives	Glycerophospholipids		Glycerophospholipids	Glycerophospholipids	Glycerophospholipids	Glycerophospholipids	Glycerophospholipids	Glycerophospholipids	Glycerophospholipids	Glycerophospholipids	Glycerophospholipids	Glycerophospholipids	Glycerophospholipids	Glycerophospholipids		Glycerophospholipids	Glycerophospholipids	Glycerophospholipids		Glycerophospholipids	Glycerophospholipids	Glycerophospholipids
SUPER CLASS (HMDB)			Lipids	Lipids	Lipids	Lipids	Lipids	Lipids	Lipids	Lipids	Lipids	Lipids	Lipids		Lipids		Lipids	Lipids			Lipids		Lipids	Lipids	Lipids	Lipids	Lipids		Lipids	Lipids	Lipids	Lipids	Lipids	Lipids	Lipids	Lipids	Lipids	Lipids	Lipids	Lipids		Lipids	Lipids	Lipids		Lipids	Lipids	Lipids
	PD354	PD	0.0669403		0.23626	1.30534	0.858411	0.416408	1.27482	0.187039	0.460707	22.689	7.37362	1.10806	16.1024	6.76381	2.74317	7.96953	16.1903	2.62314	8.92296	0.422821	0.0802037	0.10323	0.0509477	0.118025	38.6151	3.65666		3.99606	71.5707	7.73893		15.8715	7.92826	0.685124	6.00504	0.67311	0.974569	5.9215	0.951431	0.367758	0.951098	0.386891		0.272092	0.580448	0.196115
	PD423	PD	5.53523	4.42565	8.19823	5.29429	4.24812	1.40124	0.855964	0.887666	0.507238	0.444529	0.138452	0.0202037	0.23324	0.114472	0.0491403	0.137272	0.37679	0.108855	0.232768	0.0809093	0.233806	0.454772	0.143267	0.182022	35.5477	10.6415	0.342897	3.15173	217.979	18.4296	0.0606583	21.8214	16.3209	0.530631	11.3968	0.725162	2.00007	15.2226	1.92535	0.425553	2.85755	0.514015	0.219361	0.450241	2.06371	0.466951	0.0714211
	PD436	PD	2.60021	1.72292	2.30929	0.0964717	0.431108		0.562249	0.34971	0.117575	1.684	1.10258	0.12965	2.14029	0.727783	0.272477	0.57496	0.881201	0.154883	0.985568	0.0523589	0.00780276	0.00802043	0.00363348	0.0223953	22.0366	4.48558	0.176944	4.72875	91.4496	3.8051	0.0362761	24.2105	9.39655	0.0808909	5.83172	0.297853	0.381666	6.95648	1.34371	0.371477	1.598	0.813003	0.103169	0.118289	1.52162	0.421851	0.0655868
	PD520	PD	1.50456	1.29262	4.44842	0.0983165	0.29092	0.235315	1.87365	0.574587	0.56814	0.569611	0.161664	0.0271998	0.300201	0.205012	0.0603526	0.194674	0.538103	0.164986	0.297959	0.0114127	0.0111003	0.0395499	0.0127119	0.00949416	21.8851	4.94897	0.161752	2.02767	58.5017	9.47393	0.071113	10.5247	9.13481	0.322385	15.5009	1.12632	0.783855	10.7812	3.03888	0.451548	1.40027	0.386925	0.127184	0.280193	1.52872	0.281333	0.0889338
	PD530	PD	4.69266	2.35236	6.92439	4.36092	3.77585	9.81961	3.57077	2.92538	2.72633	1.19572	0.627106	0.0907875	1.08028	0.494026	0.159158	0.353735	0.837449	0.169601	0.39614	0.0598338	0.150715	0.294051	0.196295	0.150285	26.0263	4.47971	0.132501	1.99587	141.236	7.77053	0.0585635	18.3071	7.37106	0.251235	12.5826	0.768032	1.09612	14.0019	1.82789	0.398288	2.23197	0.530472	0.114418	0.327601	1.73468	0.274641	0.0456553
	PD357	PD	0.233654		0.341663	0.174138	0.180751		0.220428	0.449673	0.235858	25.009	6.69145	1.73794	14.1	4.86227	2.40944	7.26144	16.7111	3.64468	16.9027	0.533843	0.55402	1.52886	0.451523	0.686909	13.0595	1.41027	0.247455	1.2897	12.9252	5.71599		3.88514	9.3546	28.2319	0.919757	0.0440691	0.165012	0.516574	0.152014	0.392413	0.12738	0.0501348	0.0313188		0.0880763		0.0308236
	PD450	PD	10.8359	5.46071	16.201	7.46885	8.48046	9.14481	14.5804	18.7476	44.0632	3.79531	2.43161	0.26498	3.38862	1.38249	0.404444	1.14169	2.49471	0.526024	1.55457	0.181752	0.0319416	0.051174	0.0194574	0.0291298	64.4627	12.877	0.4735	5.56818	305.367	22.4656	0.17073	48.4177	29.7867	0.40748	18.4878	0.673023	1.53545	25.5185	4.82206	0.459442	3.54912	1.22312	0.284438	1.27227	2.67781	0.782119	0.143625
	PD495	PD	2.15399	4.43993	18.0038	1.62622	1.87361	0.90382	2.03854	2.26615	3.84618	1.24807	0.750111	0.118359	1.51355	0.481432	0.263195	0.560499	0.795721	0.141586	0.361192	0.0452893	0.0533916	0.0660794	0.03413	0.0342369	22.2007	3.61089	0.141437	1.66443	105.432	9.70564	0.0817708	18.8615	13.1671	0.32377	11.0897	0.948488	0.736878	10.6608	2.56537	0.42896	1.48938	0.497979	0.135953	0.285514	1.38026	0.320894	0.124441
	PD501	PD	4.33239	3.12355	10.3217	0.325458	4.53105	1.57657	1.01441	2.56985	1.57657	0.101735	0.0474742	0.00673284	0.0891393	0.0395433	0.0117852	0.0443625	0.0835543	0.0194058	0.0649322	0.00570336	0.0088994	0.0431393	0.0309398	0.0202667	5.22771	1.00363	0.0356837	0.498915	19.7109	2.90338	0.0121833	2.8285	2.19789	0.0861692	2.66894	0.134951	0.142762	2.09753	0.401133	0.0833767	0.401013	0.0657178	0.0221265	0.020889	0.279671	0.0528924	0.0153273
	PD537	PD	2.55116	2.17301	23.9158	12.7287	2.93655	1.27558	4.95938	2.03731	1.88894	0.221762	0.134197	0.0155862	0.258442	0.086221	0.0310976	0.0746349	0.173021	0.0334941	0.118362	0.00773769	0.0118457	0.0406845	0.0347892	0.021868	6.35269	1.79527	0.0497493	0.842805	21.0819	3.87956	0.0127074	5.0113	3.8122	0.119408	4.19271	0.288186	0.460748	2.66262	1.06717	0.130146	0.74313	0.248967	0.0519471	0.0337177	0.807191	0.13023	0.0227398
	PD550	PD	5.87638	7.48089	13.0679	0.324611	1.13336	0.241139	2.45406	2.54309	0.728983	0.587812	0.120062	0.0217904	0.321515	0.129155	0.041667	0.298027	0.533087	0.117539	0.268099	0.00806734	0.0139051	0.0759244	0.0270707	0.0219055	10.4454	3.40565	0.166482	1.54691	34.881	9.0565	0.0484374	6.94662	9.24889	0.380019	9.36855	0.75163	0.912542	9.12554	1.92645	0.402048	0.932886	0.201791	0.0680688	0.117629	1.10095	0.167437	0.0572554
	PD562	PD	10.7986	4.49143	6.61351	0.594183	1.49837	1.00015	0.64216	0.992765	0.852523	0.252156	0.132495	0.0157907	0.242119	0.116544	0.0369675	0.095735	0.168967	0.0450227	0.0967419	0.0142404	0.0208092	0.0207453	0.0249966	0.0175488	8.28701	1.60902	0.0603019	0.735418	49.2274	2.34493	0.0217202	5.73694	3.24801	0.0307663	3.41975	0.0580963	0.261713	4.74854	0.631963	0.0639619	0.670481	0.195002	0.0545642	0.190527	0.544203	0.116416	0.020042
	PD636	PD	2.44436	2.38275	22.3127	10.4225	82.7894	58.7988	7.01236	13.1423	68.3189	0.0410212	0.0159	0.00246448	0.0363002	0.013858	0.00579514	0.0211737	0.0494404	0.00999688	0.0138179	0.000916343	0.00138374	0.00855567	0.00459878	0.00519226	1.4863	0.39369	0.013316	0.155276	4.92716	1.58353	0.00382628	0.852287	1.16253	0.0461201	1.10237	0.112505	0.0631921	0.648483	0.282714	0.0384596	0.153644	0.038136	0.0089764	0.0173447	0.127953	0.023245	0.00604974
	PD295	PD	4.14682	2.01843	12.1656	1.39013	2.61533	4.5081	2.11268	5.14426	5.23065	0.572169	0.232307	0.0328895	0.499258	0.233097	0.0763076	0.251823	0.507543	0.106979	0.337468	0.0217216	0.047617	0.08364	0.0392819	0.0258202	25.8463	5.78412	0.211438	2.13492	98.5733	10.714	0.0594367	15.6432	13.9218	0.35291	12.0812	0.835774	0.892516	11.9801	2.28301	0.561916	1.26391	0.404588	0.141435	0.284674	1.07341	0.311159	0.0842417
	PD340	PD	4.93873	2.91113	17.3271	5.11241	4.40634	1.33285	81.5645	104.193	51.3922	0.804954	0.355479	0.0290279	0.599201	0.216513	0.0721563	0.235685	0.593633	0.11007	0.41338	0.0216745	0.019679	0.0297776	0.01431	0.0104403	29.3224	4.94352	0.160111	2.44917	108.879	13.737	0.0389501	13.873	14.4229	0.378972	9.00775	0.329417	0.753755	10.1843	1.82435	0.42855	1.35545	0.3655	0.136673	0.231661	1.26774	0.265837	0.0739534
	PD356	PD	0.301157		0.264313	1.65316	2.1081	1.24948	5.50252	2.04082	2.22503	2.9654	1.62731	0.180508	2.65531	0.631294	0.3148	0.652949	1.86244	0.355774	3.19107	0.0851304	0.0585744	0.177679	0.0776472	0.0421871	26.1872	4.27	0.0809716	2.09573	92.9339	15.6606	0.0243528	13.5686	12.5995	0.261232	8.38964	0.88018	0.722213	9.30041	1.43497	0.298256	1.21601	0.408339	0.0870728	0.33927	0.958336	0.187261	0.0236618
	PD541	PD	2.75534	1.80105	7.37895	0.317201	2.59943	0.715045	4.49995	8.53754	1.74192	1.22445	0.562136	0.0958657	1.12845	0.362405	0.181942	0.36677	0.765994	0.163971	0.841514	0.0519782	0.0473575	0.0641601	0.0488552	0.0509372	28.5458	4.79361	0.161268	2.05195	126.851	8.40181	0.0564163	15.8904	9.41526	0.314426	12.8371	1.05204	1.26886	15.2946	2.29961	0.628633	2.19118	0.423679	0.128357	0.52044	1.57222	0.334425	0.0643062
	PD546	PD	2.72068	2.3959	25.8724	0.736773	3.23475	2.32724	15.8824	11.4246	2.98421	0.0953493	0.0483307	0.00491861	0.0687482	0.059538	0.0103012	0.0394105	0.110147	0.03256	0.101323	0.00473013	0.0130505	0.0474191	0.0275743	0.0163235	10.1832	2.09414	0.0551196	1.38627	33.7086	7.16421	0.0149751	6.12649	5.90545	0.177458	5.98299	0.147261	0.364133	4.50769	1.12331	0.16156	0.856489	0.196281	0.07381	0.0401409	0.891922	0.167958	0.0278679
	PD579	PD	7.3935	4.12247	10.6951	25.7027	14.3613	10.1592	22.7808	5.0413	2.56659	2.16922	1.22569	0.202411	2.08354	1.41803	0.320228	0.599977	1.01213	0.273512	0.742756	0.100384	0.0604221	0.0222704	0.0317627	0.0371021	24.4805	4.12804	0.186225	1.80916	132.932	5.39652	0.0551587	24.2223	12.0893	0.121666	9.45598	0.294915	0.801673	13.3364	2.05088	0.350637	1.37039	0.678303	0.132573	0.374322	1.6045	0.328153	0.0775356
	PD591	PD	1.93538	0.858009	10.5349	0.997776	0.990011	0.234885	0.27565	0.333886	0.198002	1.50049	0.837489	0.0968611	1.638	0.635155	0.216625	0.444553	1.02197	0.212931	0.39019	0.0421119	0.0250624	0.0612582	0.0285447	0.0170682	15.0609	3.13789	0.12276	1.34732	68.2249	11.3844	0.0345857	15.6094	11.1333	0.270108	11.2925	0.48433	0.486122	7.24238	2.06404	0.321556	1.03697	0.497405	0.0554419	0.177465	0.738812	0.151567	0.056041
	C022	Control	1.92529	1.92944	22.605	1.04883	0.988604		7.16946	6.47785	0.990681	0.205181	0.163279	0.0163904	0.310393	0.0803168	0.0300919	0.100329	0.260736	0.0425085	0.141311	0.00667571	0.00672624	0.0315836	0.0229103	0.0105151	3.95498	1.37584	0.0362641	0.612343	15.5256	5.14973	0.0135468	4.73604	3.87238	0.203689	3.42488	0.424283	0.311585	1.65943	0.722736	0.144922	0.529442	0.171165	0.0239615	0.0193832	0.510625	0.082089	0.0224839
	C023	Control	0.391176	0.522337	9.54655	0.407435	0.655113	0.165522	1.87096	5.49844	2.92526	0.00218962	0.000415495	0.000156597	0.00153229	0.000935292	0.000645275	0.00274885	0.00640739	0.00171781	0.000965077	4.11904e-05	1.11356e-05	0.00053735	0.000112229	0.000755979	0.103537	0.0606267	0.00333897	0.021267	0.521783	0.504705	0.000635346	0.120328	0.292007	0.0241899	0.29416	0.0594299	0.0249945	0.0864919	0.0834897	0.0156796	0.183576	0.00666221	0.00141104	0.00200867	0.0514343	0.00739736	0.0011009
	C030	Control	2.77757	3.76073	11.5709	5.10139	4.04261	3.25884	1.41629	0.646267		2.00802	0.854986	0.111807	1.85782	0.699486	0.308515	0.725549	1.27887	0.254275	0.678294	0.0489961	0.0301921	0.0514811	0.0292333	0.0215434	34.078	4.9797	0.195534	2.04079	142.308	14.3669	0.0431846	16.7167	16.1966	0.455092	11.2107	0.721127	0.50444	10.4948	2.13812	0.521366	1.70729	0.345164	0.0385864	0.266719	1.20874	0.359605	0.120788
	C008	Control	5.51249	3.50311	13.0716	60.5124	76.8399	49.5885	5.88725	2.32832	1.7489	0.418814	0.218035	0.0262829	0.40397	0.158591	0.0541914	0.127687	0.286003	0.0744695	0.220231	0.0187467	0.0434646	0.0905294	0.0342827	0.0293794	18.5429	5.05234	0.184397	1.63415	83.2544	9.12088	0.0211513	10.9213	10.5856	0.211949	7.42423	0.356623	0.517585	7.04341	1.44785	0.274839	1.14242	0.214979	0.0804407	0.101135	0.915544	0.226807	0.0270755
	C015	Control	0.557672	0.350133	3.50345	12.9803	18.2098	4.73033	4.86092	9.2983	14.0286	0.0742593	0.061324	0.00211411	0.0353856	0.0154563	0.00701755	0.0581071	0.0960491	0.0199588	0.201875	0.00357659	0.00354416	0.00714434	0.00321982	0.00203745	19.002	4.51075	0.142388	3.65776	51.4003	9.75631	0.0238037	10.228	6.84004	0.303073	6.90563	0.410412	0.528428	4.62945	0.980325	0.196453	1.53956	0.259024	0.0900576	0.0552883	1.24203	0.20537	0.0264721
	C026	Control	12.5371	9.38015	80.9118	0.822821	1.20233	0.540711	11.4691	12.124	11.6202	0.029365	0.00733251	0.000875294	0.0176171	0.00867266	0.00254454	0.0202283	0.068511	0.0142674	0.0218501	0.000575795	0.00105291	0.0106507	0.0049896	0.00753334	0.831212	0.33959	0.00948741	0.136946	4.39316	2.4118	0.00158764	0.931675	1.2936	0.0617911	1.22072	0.223101	0.109024	0.546958	0.149729	0.0265207	0.38462	0.022616	0.00681833	0.00745813	0.19556	0.020388	0.00369213
	C032	Control	8.98251	9.81047	33.0163	1.59779	2.62305	1.29655	2.74637	3.1674	9.33483	0.0201129	0.0119823	0.00136392	0.0209427	0.00709801	0.00420164	0.0113723	0.0292853	0.0067581	0.0240928	0.00086522	0.00640646	0.041835	0.0162724	0.0207324	1.54858	0.684608	0.0231406	0.234998	7.48899	4.72359	0.00318306	1.06905	1.88614	0.136737	2.31968	0.505403	0.110313	0.717434	0.452741	0.0441943	1.14771	0.0338497	0.0097054	0.0137316	0.365651	0.046	0.00356216
	C054	Control	1.41129	1.06662	9.91162	3.07595	7.47842	0.630654	0.543089	0.666053	0.0288778	0.12838	0.0922674	0.00722883	0.0736197	0.0369169	0.0126276	0.0374886	0.140125	0.0304112	0.317298	0.00521342	0.009286	0.0167576	0.0100849	0.00706175	15.0495	3.49829	0.126396	3.16426	46.4564	7.37641	0.0229944	8.88372	6.98224	0.183924	7.22875	0.376455	0.345229	4.94996	1.43847	0.231537	1.11508	0.287177	0.047905	0.0559797	0.924222	0.191701	0.0282235
	C064	Control	0.179459	0.0771868	1.13175	0.0784732	0.186856	0.0598198	1.12371	2.79288	0.0685033	2.55367	2.40361	0.198637	4.70116	0.915416	0.379892	0.572993	1.498	0.224853	0.800705	0.0595501	0.00951766	0.0172536	0.0195112	0.0091103	5.66328	2.48208	0.0911106	0.730987	63.6292	3.85329	0.0214833	27.4811	9.88665	0.136053	5.76078	0.56493	0.594576	4.95308	1.51478	0.287776	0.506385	1.05155	0.0595539	0.216652	0.72678	0.114235	0.0308715
	C076	Control	0.813664	0.523328	2.84118	0.105631	0.395967	0.478661	0.38812	0.39657	0.377858	0.0340745	0.0384082	0.00471345	0.075788	0.0273387	0.00863992	0.024676	0.0696907	0.0140685	0.0736216	0.00249901	0.0022466	0.014783	0.0072032	0.00679992	2.3185	0.90148	0.0231679	0.658001	6.51694	1.85781	0.00668671	2.14616	1.49133	0.0832873	1.93709	0.225954	0.151111	0.78669	0.427672	0.0756008	0.623859	0.112922	0.0140452	0.00870115	0.523802	0.125646	0.0138981
		GROUPS	ANALYSIS	AC02	AC04	AC11	BA03	BA05	BA06_BA07	BA15	BA16H	BA18	Cer_02	Cer_03	Cer_04	Cer_05	Cer_06	Cer_07	Cer_09	Cer_10_Cer_11	Cer_12	Cer_13	Cer_16	ChoE_07	ChoE_08	ChoE_12	ChoE_17	DAPC03	DAPC04	DAPC05	DAPC06	DAPC07	DAPC08	DAPC09	DAPC11	DAPC12	DAPC13	DAPC14	DAPC15	DAPC18	DAPC19	DAPC20	DAPC23	DAPC24	DAPC26	DAPC28	DAPC29	DAPC30	DAPC32
			Class	Fatty esters	Fatty esters	Fatty esters	Bile acids	Bile acids	Bile acids	Bile acids	Bile acids	Bile acids	Sphingolipids	Sphingolipids	Sphingolipids	Sphingolipids	Sphingolipids	Sphingolipids	Sphingolipids	Sphingolipids	Sphingolipids	Sphingolipids	Sphingolipids	Sterols	Sterols	Sterols	Sterols	Glycerophospholipids	Glycerophospholipids	Glycerophospholipids	Glycerophospholipids	Glycerophospholipids	Glycerophospholipids	Glycerophospholipids	Glycerophospholipids	Glycerophospholipids	Glycerophospholipids	Glycerophospholipids	Glycerophospholipids	Glycerophospholipids	Glycerophospholipids	Glycerophospholipids	Glycerophospholipids	Glycerophospholipids	Glycerophospholipids	Glycerophospholipids	Glycerophospholipids	Glycerophospholipids	Glycerophospholipids
			Subclass A	Acylcarnitines	Acylcarnitines	Acylcarnitines	Primary bile acids	Primary bile acids		Glycine-conjugated bile acids	Glycine-conjugated bile acids	Glycine-conjugated bile acids	Ceramides	Ceramides	Ceramides	Ceramides	Ceramides	Ceramides	Ceramides	Ceramides	Ceramides	Ceramides	Ceramides	Cholesteryl Ester	Cholesteryl Ester	Cholesteryl Ester	Cholesteryl Ester	Diacylglycerophosphocholine	Diacylglycerophosphocholine	Diacylglycerophosphocholine	Diacylglycerophosphocholine	Diacylglycerophosphocholine	Diacylglycerophosphocholine	Diacylglycerophosphocholine	Diacylglycerophosphocholine	Diacylglycerophosphocholine	Diacylglycerophosphocholine	Diacylglycerophosphocholine	Diacylglycerophosphocholine	Diacylglycerophosphocholine	Diacylglycerophosphocholine	Diacylglycerophosphocholine	Diacylglycerophosphocholine	Diacylglycerophosphocholine	Diacylglycerophosphocholine	Diacylglycerophosphocholine	Diacylglycerophosphocholine	Diacylglycerophosphocholine	Diacylglycerophosphocholine
			Subclass B										CER[NS]	CER[NS]	CER[NS]	CER[NS]	CER[NS]	CER[NS]	CER[NS]	CER[NS]	CER[NS]	CER[NS]	CER[NS]
			Subclass C										Sphingoid base d18:1	Sphingoid base d18:1	Sphingoid base d18:1	Sphingoid base d18:1	Mixed sphingoid base	Sphingoid base d18:1	Sphingoid base d18:1	Mixed sphingoid base	Mixed sphingoid base	Sphingoid base d18:1	Sphingoid base d18:1
			Common name or function	L-Octanoylcarnitine	Decanoylcarnitine	Oleoylcarnitine	CA (31% bile)	CDCA (45% bile)	UDCA + HDCA	GCA	GCDCA	GDCA
			Individual notation	AC(8:0)	AC(10:0)	AC(18:1n-9)	Cholic acid	Chenodeoxycholic acid	Ursodeoxycholic + Hyodeoxycholic acid	Glycocholic acid	Glycochenodeoxycholic acid	Glycodeoxycholic acid	Cer(d18:1/16:0)	Cer(d18:1/20:0)	Cer(d18:1/21:0)	Cer(d18:1/22:0)	Cer(40:2)	Cer(d18:1/23:0)	Cer(d18:1/24:0)	Cer(d18:1/24:1)+Cer(d18:2/24:0)	Cer(42:3)	Cer(d18:1/18:0)	Cer(d18:1/19:0)	ChoE(18:1)	ChoE(18:2)	ChoE(20:4)	ChoE(22:6)	PC(16:0/16:0)	PC(32:1)	PC(14:0/18:2)	PC(16:0/18:0)	PC(16:0/18:1)	PC(16:0/18:2)	PC(14:0/20:4)	PC(18:0/18:1)	PC(18:0/18:2)	PC(18:2/18:2)	PC(16:0/20:4)	PC(16:0/20:5)	PC(18:0/20:3)	PC(18:0/20:4)	PC(38:5)	PC(18:2/20:4)	PC(16:0/22:6)	PC(18:0/22:4)	PC(40:5)	PC(18:0/22:5)	PC(18:0/22:6)	PC(18:1/22:6)
			Individual composition or probable ID																										PC(16:0/16:1) + PC(14:1/18:0) + PC(14:0/18:1)													PC(18:1/20:4) + PC(16:0/22:5)
			Link	HMDB00791	HMDB00651	HMDB05065	HMDB00619	HMDB00518	HMDB00946	HMDB00138	HMDB00637	HMDB00631	HMDB04949	HMDB04951		HMDB04952		HMDB00950	HMDB04956			HMDB04950		HMDB00918	HMDB00610	HMDB06726	HMDB06733	HMDB00564		HMDB07874	HMDB07970	HMDB07972	HMDB07973	HMDB07883	HMDB08038	HMDB08039	HMDB08138	HMDB07982	HMDB07984	HMDB08046	HMDB08048		HMDB08147	HMDB07991	HMDB08054		HMDB08056	HMDB08057	HMDB08123
			Simplified name	AC	AC	AC	BA	BA	BA	BA	BA	BA	Cer	Cer	Cer	Cer	Cer	Cer	Cer	Cer	Cer	Cer	Cer	ChoE	ChoE	ChoE	ChoE	PC_DAPC	PC_DAPC	PC_DAPC	PC_DAPC	PC_DAPC	PC_DAPC	PC_DAPC	PC_DAPC	PC_DAPC	PC_DAPC	PC_DAPC	PC_DAPC	PC_DAPC	PC_DAPC	PC_DAPC	PC_DAPC	PC_DAPC	PC_DAPC	PC_DAPC	PC_DAPC	PC_DAPC	PC_DAPC
			Simple name	AC	AC	AC	BA	BA	BA	BA	BA	BA	Cer	Cer	Cer	Cer	Cer	Cer	Cer	Cer	Cer	Cer	Cer	ChoE	ChoE	ChoE	ChoE	PC	PC	PC	PC	PC	PC	PC	PC	PC	PC	PC	PC	PC	PC	PC	PC	PC	PC	PC	PC	PC	PC
		PD	Mean	3.89088	3.14428	10.8566	4.0365	7.16716	5.85223	8.68388	9.21942	9.61149	3.35858	1.23077	0.210101	2.42393	0.948632	0.384052	1.06594	2.28537	0.45075	1.81167	0.0876308	0.0725794	0.16105	0.0651168	0.0759579	21.763	4.17345	0.156837	2.07381	89.8196	8.86659	0.0478812	14.4104	10.0808	1.66863	8.58069	0.531267	0.740192	9.03541	1.70082	0.338227	1.31982	0.406312	0.104047	0.281804	1.12711	0.262131
			90% Winsored mean	3.89736		10.7602	3.3879	3.75126		5.74746	4.9545	8.76917	3.2453	1.19824	0.17873	2.32543	0.85484	0.367591	1.03145	2.26104	0.400144	1.41524	0.0822704	0.0568896	0.107372	0.0524037	0.0509286	20.6577	4.09218	0.158015	2.04902	85.8501	8.70286		13.2995	9.45932	0.292062	8.44048	0.528254	0.72094	8.53081	1.61819	0.336166	1.28655	0.386406	0.104739	0.28199	1.0984	0.263691
			Median	2.73801	2.3959	10.4283	1.34773	2.60738	1.30422	2.28337	2.40462	1.81543	1.00034	0.458807	0.0618385	0.839739	0.297751	0.117733	0.325881	0.679814	0.148235	0.375691	0.0437006	0.028502	0.0562161	0.0313513	0.0241078	22.1187	3.89235	0.160111	1.90252	81.5101	8.08617	0.0436938	14.7412	9.37557	0.292267	9.18815	0.578677	0.745317	9.21297	1.82612	0.381945	1.23996	0.395757	0.103169	0.272092	1.08718	0.265837
			SEM	0.685367	0.414699	1.74574	1.40079	4.04687	3.2145	4.06779	5.12305	4.43783	1.58454	0.465613	0.0969387	0.99532	0.388834	0.170263	0.505215	1.09159	0.210296	0.911165	0.0316806	0.0282413	0.0759343	0.0228688	0.033931	3.22368	0.67421	0.0254583	0.30723	16.3682	1.22077	0.00894454	2.39449	1.39734	1.39856	1.06623	0.0786361	0.109154	1.35321	0.241165	0.0364579	0.192057	0.0625502	0.0155247	0.0642955	0.147372	0.0394899
			SD	3.06505	1.70985	7.80719	6.26452	18.0982	13.638	18.1917	22.911	19.8466	7.08627	2.08229	0.433523	4.45121	1.73892	0.761438	2.25939	4.88173	0.940472	4.07485	0.14168	0.126299	0.339589	0.102273	0.151744	14.4167	3.01516	0.11097	1.37398	73.201	5.45944	0.0379485	10.7085	6.24909	6.25456	4.76834	0.351671	0.488153	6.05173	1.07852	0.163045	0.858905	0.279733	0.0676707	0.280257	0.659066	0.172132
			Coefficient of Variation	0.787753	0.543796	0.719116	1.55197	2.52515	2.33039	2.09488	2.48508	2.06488	2.1099	1.69185	2.0634	1.83636	1.83308	1.98264	2.11961	2.13608	2.08646	2.24922	1.61678	1.74015	2.1086	1.5706	1.99774	0.662444	0.722462	0.707548	0.662537	0.814978	0.615732	0.792554	0.743106	0.619897	3.74832	0.555706	0.661948	0.659495	0.669779	0.63412	0.482057	0.650777	0.688468	0.650388	0.994512	0.58474	0.656666
			IQR	2.98851	2.40722	10.4102	4.83264	3.19015	3.20064	4.90518	5.18318	2.64679	1.40887	0.999583	0.123264	1.84337	0.542286	0.242566	0.454326	0.688743	0.136587	0.673361	0.0713882	0.046287	0.0514308	0.0257665	0.026946	16.397	2.81167	0.110948	0.880569	78.7844	5.86432	0.0368401	12.4166	5.73671	0.258133	6.14596	0.532013	0.550766	7.63086	1.08055	0.164571	0.688388	0.301574	0.0792599	0.215477	0.840378	0.165022
			Kurtosis	0.0632815	0.042866	-1.01261	4.45599	12.25	9.63436	9.91731	11.7753	2.28975	4.14349	3.19786	5.65421	3.85561	4.56456	4.13248	4.20168	4.12012	5.0907	6.88579	3.53782	7.72391	10.2024	7.36808	10.168	1.42471	1.81245	1.27973	0.367195	1.52299	-0.0323953	3.38545	2.49521	2.48603	13.2695	-0.887732	-1.51175	0.138408	0.463982	1.195	-0.804347	0.356282	1.34977	0.557453	5.4024	-0.415192	1.90819
			Skewness	0.926487	0.874738	0.344972	2.16123	3.62917	3.22051	3.20139	3.53785	1.96297	2.3967	2.11784	2.58529	2.29241	2.38214	2.37785	2.41578	2.40445	2.53381	2.76712	2.16003	2.82916	3.26843	2.76823	3.25005	1.05673	1.43582	1.18345	1.02427	1.30095	0.80856	1.69326	1.38608	1.27415	3.81916	0.0901097	0.0801792	0.755043	0.717782	0.919192	-0.426151	0.900273	1.0763	0.904204	2.18688	0.335062	1.26245
			Shapiro test (W)	0.892383	0.914481	0.949325	0.663799	0.367297	0.430141	0.478213	0.399559	0.516868	0.474099	0.593098	0.50449	0.542118	0.55004	0.499043	0.461207	0.453686	0.472031	0.473744	0.607924	0.545107	0.447378	0.55051	0.456907	0.905413	0.82858	0.884176	0.894571	0.872483	0.934166	0.816065	0.862069	0.879957	0.257766	0.971103	0.926225	0.940903	0.942119	0.92127	0.918126	0.921921	0.899657	0.915753	0.736589	0.973941	0.88989
			Shapiro test (p)	0.0297537	0.119101	0.356953	1.4566e-05	2.45658e-08	2.09943e-07	2.03145e-07	4.42331e-08	4.5337e-07	1.86923e-07	2.49982e-06	3.49123e-07	7.82753e-07	9.32562e-07	3.11601e-07	1.44393e-07	1.24429e-07	1.79291e-07	1.85591e-07	3.56119e-06	8.36037e-07	1.09937e-07	9.42357e-07	1.32596e-07	0.052153	0.0023815	0.0254016	0.0326621	0.0129946	0.185657	0.00258469	0.00854913	0.0176608	3.82036e-09	0.777978	0.130605	0.249377	0.26286	0.104826	0.0911929	0.107894	0.0406328	0.0944651	0.000156956	0.834907	0.0320469
			Box-Cox Transformation (lambda)	0.5	0.1	0.8	0	-0.1	-0.2	-0.1	-0.1	-0.2	-0.1	0	-0.1	0	0	-0.1	-0.1	-0.1	-0.1	-0.1	0	0	-0.2	0	-0.3	0.5	0.3	0.4	0.4	0.3	0.4	0.3	0.4	0.4	-0.3	0.9	0.8	0.5	0.6	0.5	1.5	0.5	0.5	0.5	0.3	0.8	0.4
		Control	Mean	3.50882	3.09235	18.811	8.57311	11.2623	6.74995	3.74753	4.33961	4.56931	0.547407	0.385164	0.0369569	0.749823	0.195023	0.0808366	0.168118	0.373367	0.0683287	0.248025	0.014674	0.0112448	0.0282556	0.0147819	0.0115469	10.1092	2.38853	0.0835226	1.28915	42.1495	5.91214	0.0158257	8.32342	5.93266	0.179979	4.77266	0.386772	0.319729	3.58677	0.935591	0.181889	0.887995	0.250511	0.0372485	0.0747058	0.666439	0.137924
			90% Winsored mean	3.50882	3.09235	18.811	8.57311	11.2623		3.74753	4.33961		0.547407	0.385164	0.0369569	0.749823	0.195023	0.0808366	0.168118	0.373367	0.0683287	0.248025	0.014674	0.0112448	0.0282556	0.0147819	0.0115469	10.1092	2.38853	0.0835226	1.28915	42.1495	5.91214	0.0158257	8.32342	5.93266	0.179979	4.77266	0.386772	0.319729	3.58677	0.935591	0.181889	0.887995	0.250511	0.0372485	0.0747058	0.666439	0.137924
			Median	1.66829	1.49803	10.7413	1.32331	1.91269	0.630654	2.30866	2.98014	1.7489	0.10132	0.0767957	0.00597114	0.0747039	0.0321278	0.0106338	0.0477979	0.118087	0.025185	0.171593	0.00439501	0.00656635	0.0170056	0.0131786	0.00832182	4.80913	1.92896	0.0636874	0.694494	30.991	4.93666	0.017349	6.80988	5.35621	0.160331	4.59283	0.393433	0.328407	3.14444	0.851531	0.170688	0.869469	0.193072	0.0312739	0.0373358	0.625291	0.119941
			SEM	1.3321	1.15738	7.54615	5.90222	7.49057	5.38076	1.13308	1.25431	1.84018	0.294369	0.23835	0.0209073	0.473788	0.104403	0.0445101	0.0819494	0.172387	0.0293735	0.0883448	0.00686122	0.00449456	0.00854505	0.00365764	0.00293435	3.53857	0.62638	0.0234558	0.408584	14.3856	1.34521	0.00422419	2.73605	1.62699	0.0399759	1.09841	0.059665	0.0663853	1.08404	0.215482	0.0495717	0.162381	0.0964292	0.00997281	0.0296997	0.128781	0.0345792
			SD	4.21248	3.65995	23.863	18.6645	23.6873	16.1423	3.5831	3.96646	5.52053	0.930876	0.75373	0.0661147	1.49825	0.330152	0.140753	0.259147	0.545136	0.0928872	0.279371	0.0216971	0.0142131	0.0270218	0.0115665	0.00927922	11.1899	1.98079	0.0741739	1.29205	45.4913	4.25394	0.0133581	8.65216	5.145	0.126415	3.47347	0.188677	0.209929	3.42803	0.681414	0.156759	0.513494	0.304936	0.0315368	0.0939187	0.40724	0.109349
			Coefficient of Variation	1.20054	1.18355	1.26857	2.17709	2.10324	2.39147	0.956124	0.914014	1.20818	1.70052	1.95691	1.78897	1.99814	1.69289	1.74121	1.54146	1.46005	1.35942	1.12638	1.47861	1.26397	0.956335	0.782473	0.803611	1.1069	0.829291	0.88807	1.00225	1.07928	0.719526	0.844075	1.0395	0.867234	0.702388	0.727785	0.487826	0.656584	0.955743	0.728324	0.861842	0.578262	1.21725	0.84666	1.25718	0.611069	0.792822
			IQR	4.20709	3.17374	15.2074	4.08375	5.88099	2.78018	4.43381	5.15138	8.95698	0.334864	0.185757	0.0222583	0.356023	0.128654	0.0432609	0.0995072	0.21088	0.052361	0.256556	0.0144553	0.00688876	0.0275883	0.0165175	0.0113127	15.9285	3.51881	0.115243	1.6098	53.812	5.91259	0.0185576	9.40967	7.57052	0.113406	5.11523	0.226502	0.393787	4.21755	1.01156	0.211968	0.63424	0.226521	0.0458513	0.0798876	0.520158	0.14693
			Kurtosis	-0.481775	-0.856892	1.67168	3.01778	2.89787	2.52639	-0.55042	-1.00697	-1.5199	-0.182639	2.18825	0.785934	1.89959	-0.133355	-0.226826	-0.203176	-0.361203	-0.508171	-0.742467	-0.466556	0.0492279	0.0599211	-1.49	-1.09584	-0.638381	-1.83984	-1.74698	-1.19806	-0.377708	-0.943462	-0.81507	-0.294275	-1.00719	-0.322331	-1.28868	-0.903047	-1.83896	-0.967515	-1.43781	-0.462541	-1.56853	1.86511	-1.49149	-0.613754	-1.52407	-0.853455
			Skewness	1.04596	0.938951	1.67168	2.10702	2.07165	2.03669	0.874889	0.689484	0.643277	1.28767	1.87946	1.51968	1.80625	1.29437	1.28586	1.27033	1.22363	1.15202	0.936924	1.15306	1.26673	1.09023	0.316617	0.632154	0.854453	0.215324	0.305861	0.689523	0.906378	0.544124	0.524401	0.930622	0.590206	0.803503	0.325314	0.0166957	-0.0542575	0.629204	0.264745	0.75373	0.203168	1.67607	0.415181	1.03475	0.0178762	0.554106
			Shapiro test (W)	0.791049	0.772334	0.70928	0.51575	0.529958	0.468734	0.868273	0.889782	0.797728	0.634477	0.577491	0.631032	0.57813	0.640878	0.617968	0.662075	0.670028	0.701989	0.818076	0.700567	0.744551	0.855554	0.94672	0.893408	0.838716	0.879744	0.875759	0.861467	0.854586	0.950063	0.903323	0.86641	0.910207	0.923069	0.938476	0.984564	0.897934	0.879891	0.936121	0.902306	0.931202	0.726199	0.915124	0.769299	0.955066	0.939979
			Shapiro test (p)	0.0112841	0.00667695	0.00114143	5.56668e-06	8.18061e-06	2.74001e-06	0.0954338	0.168621	0.0192362	0.000142883	2.98507e-05	0.000129919	3.03767e-05	0.000170519	9.06332e-05	0.000306685	0.000382442	0.000931177	0.0240196	0.00089495	0.00306308	0.0676123	0.629883	0.18518	0.0425886	0.129612	0.116606	0.0794064	0.065851	0.669246	0.238201	0.0907622	0.282419	0.383263	0.536186	0.984883	0.207914	0.130119	0.510712	0.232206	0.459819	0.0018319	0.318075	0.006132	0.728488	0.552778
			Box-Cox Transformation (lambda)	0	0.1	0	0	-0.2	-0.1	0.1	0.3	0.2	0	0.1	0	0	0	-0.1	0	0	0	0.3	0.1	0.3	0.4	0.6	0.4	0.3	0.4	0.3	0.3	0.3	0.5	0.5	0.3	0.4	0.4	0.6	1	0.8	0.3	0.6	0.4	0.6	0.2	0.4	0.1	0.9	0.5
		COMPARISON	ANALYSIS	AC02	AC04	AC11	BA03	BA05	BA06_BA07	BA15	BA16H	BA18	Cer_02	Cer_03	Cer_04	Cer_05	Cer_06	Cer_07	Cer_09	Cer_10_Cer_11	Cer_12	Cer_13	Cer_16	ChoE_07	ChoE_08	ChoE_12	ChoE_17	DAPC03	DAPC04	DAPC05	DAPC06	DAPC07	DAPC08	DAPC09	DAPC11	DAPC12	DAPC13	DAPC14	DAPC15	DAPC18	DAPC19	DAPC20	DAPC23	DAPC24	DAPC26	DAPC28	DAPC29	DAPC30	DAPC32
			Class	Fatty esters	Fatty esters	Fatty esters	Bile acids	Bile acids	Bile acids	Bile acids	Bile acids	Bile acids	Sphingolipids	Sphingolipids	Sphingolipids	Sphingolipids	Sphingolipids	Sphingolipids	Sphingolipids	Sphingolipids	Sphingolipids	Sphingolipids	Sphingolipids	Sterols	Sterols	Sterols	Sterols	Glycerophospholipids	Glycerophospholipids	Glycerophospholipids	Glycerophospholipids	Glycerophospholipids	Glycerophospholipids	Glycerophospholipids	Glycerophospholipids	Glycerophospholipids	Glycerophospholipids	Glycerophospholipids	Glycerophospholipids	Glycerophospholipids	Glycerophospholipids	Glycerophospholipids	Glycerophospholipids	Glycerophospholipids	Glycerophospholipids	Glycerophospholipids	Glycerophospholipids	Glycerophospholipids	Glycerophospholipids
			Subclass A	Acylcarnitines	Acylcarnitines	Acylcarnitines	Primary bile acids	Primary bile acids		Glycine-conjugated bile acids	Glycine-conjugated bile acids	Glycine-conjugated bile acids	Ceramides	Ceramides	Ceramides	Ceramides	Ceramides	Ceramides	Ceramides	Ceramides	Ceramides	Ceramides	Ceramides	Cholesteryl Ester	Cholesteryl Ester	Cholesteryl Ester	Cholesteryl Ester	Diacylglycerophosphocholine	Diacylglycerophosphocholine	Diacylglycerophosphocholine	Diacylglycerophosphocholine	Diacylglycerophosphocholine	Diacylglycerophosphocholine	Diacylglycerophosphocholine	Diacylglycerophosphocholine	Diacylglycerophosphocholine	Diacylglycerophosphocholine	Diacylglycerophosphocholine	Diacylglycerophosphocholine	Diacylglycerophosphocholine	Diacylglycerophosphocholine	Diacylglycerophosphocholine	Diacylglycerophosphocholine	Diacylglycerophosphocholine	Diacylglycerophosphocholine	Diacylglycerophosphocholine	Diacylglycerophosphocholine	Diacylglycerophosphocholine	Diacylglycerophosphocholine
			Subclass B										CER[NS]	CER[NS]	CER[NS]	CER[NS]	CER[NS]	CER[NS]	CER[NS]	CER[NS]	CER[NS]	CER[NS]	CER[NS]
			Subclass C										Sphingoid base d18:1	Sphingoid base d18:1	Sphingoid base d18:1	Sphingoid base d18:1	Mixed sphingoid base	Sphingoid base d18:1	Sphingoid base d18:1	Mixed sphingoid base	Mixed sphingoid base	Sphingoid base d18:1	Sphingoid base d18:1
			Common name or function	L-Octanoylcarnitine	Decanoylcarnitine	Oleoylcarnitine	CA (31% bile)	CDCA (45% bile)	UDCA + HDCA	GCA	GCDCA	GDCA
			Individual notation	AC(8:0)	AC(10:0)	AC(18:1n-9)	Cholic acid	Chenodeoxycholic acid	Ursodeoxycholic + Hyodeoxycholic acid	Glycocholic acid	Glycochenodeoxycholic acid	Glycodeoxycholic acid	Cer(d18:1/16:0)	Cer(d18:1/20:0)	Cer(d18:1/21:0)	Cer(d18:1/22:0)	Cer(40:2)	Cer(d18:1/23:0)	Cer(d18:1/24:0)	Cer(d18:1/24:1)+Cer(d18:2/24:0)	Cer(42:3)	Cer(d18:1/18:0)	Cer(d18:1/19:0)	ChoE(18:1)	ChoE(18:2)	ChoE(20:4)	ChoE(22:6)	PC(16:0/16:0)	PC(32:1)	PC(14:0/18:2)	PC(16:0/18:0)	PC(16:0/18:1)	PC(16:0/18:2)	PC(14:0/20:4)	PC(18:0/18:1)	PC(18:0/18:2)	PC(18:2/18:2)	PC(16:0/20:4)	PC(16:0/20:5)	PC(18:0/20:3)	PC(18:0/20:4)	PC(38:5)	PC(18:2/20:4)	PC(16:0/22:6)	PC(18:0/22:4)	PC(40:5)	PC(18:0/22:5)	PC(18:0/22:6)	PC(18:1/22:6)
			Individual composition or probable ID																										PC(16:0/16:1) + PC(14:1/18:0) + PC(14:0/18:1)													PC(18:1/20:4) + PC(16:0/22:5)
			Link	HMDB00791	HMDB00651	HMDB05065	HMDB00619	HMDB00518	HMDB00946	HMDB00138	HMDB00637	HMDB00631	HMDB04949	HMDB04951		HMDB04952		HMDB00950	HMDB04956			HMDB04950		HMDB00918	HMDB00610	HMDB06726	HMDB06733	HMDB00564		HMDB07874	HMDB07970	HMDB07972	HMDB07973	HMDB07883	HMDB08038	HMDB08039	HMDB08138	HMDB07982	HMDB07984	HMDB08046	HMDB08048		HMDB08147	HMDB07991	HMDB08054		HMDB08056	HMDB08057	HMDB08123
			Simplified name	AC	AC	AC	BA	BA	BA	BA	BA	BA	Cer	Cer	Cer	Cer	Cer	Cer	Cer	Cer	Cer	Cer	Cer	ChoE	ChoE	ChoE	ChoE	PC_DAPC	PC_DAPC	PC_DAPC	PC_DAPC	PC_DAPC	PC_DAPC	PC_DAPC	PC_DAPC	PC_DAPC	PC_DAPC	PC_DAPC	PC_DAPC	PC_DAPC	PC_DAPC	PC_DAPC	PC_DAPC	PC_DAPC	PC_DAPC	PC_DAPC	PC_DAPC	PC_DAPC	PC_DAPC
			Simple name	AC	AC	AC	BA	BA	BA	BA	BA	BA	Cer	Cer	Cer	Cer	Cer	Cer	Cer	Cer	Cer	Cer	Cer	ChoE	ChoE	ChoE	ChoE	PC	PC	PC	PC	PC	PC	PC	PC	PC	PC	PC	PC	PC	PC	PC	PC	PC	PC	PC	PC	PC	PC
		PD vs. Control	Diff mean	0.382061	0.0519338	-7.95437	-4.53661	-4.09511	-0.897718	4.93635	4.87981	5.04218	2.81118	0.845609	0.173144	1.6741	0.75361	0.303216	0.897827	1.912	0.382421	1.56365	0.0729568	0.0613346	0.132794	0.0503349	0.0644109	11.6537	1.78492	0.0733149	0.784661	47.6701	2.95444	0.0320555	6.08702	4.14818	1.48865	3.80803	0.144496	0.420464	5.44863	0.765224	0.156338	0.431821	0.155801	0.0667982	0.207098	0.460672	0.124207
			Effect size (Glass's Delta)	0.0906973	0.0141898	-0.333334	-0.243061	-0.172882	-0.0556129	1.37768	1.23027	0.913351	3.01993	1.1219	2.61885	1.11737	2.28261	2.15423	3.46455	3.50739	4.11705	5.59704	3.36252	4.31537	4.91433	4.35179	6.94142	1.04145	0.901119	0.988419	0.607297	1.0479	0.694519	2.39971	0.703526	0.806255	11.7759	1.09632	0.765835	2.00289	1.58943	1.123	0.997312	0.840946	0.51093	2.1181	2.20508	1.13121	1.13588
			F test to compare two variances (F)	0.529419	0.218256	0.107038	0.112654	0.583766	0.713789	25.7768	33.3641	12.9244	57.9499	7.63218	42.9961	8.82647	27.7415	29.2652	76.0137	80.1935	102.513	212.747	42.6396	78.9631	157.935	78.1838	267.424	1.65989	2.3171	2.23826	1.13083	2.58927	1.64707	8.07052	1.53182	1.47524	2447.92	1.88454	3.47404	5.40716	3.11651	2.50516	1.0818	2.79782	0.84153	4.60433	8.90451	2.61913	2.47797
			F test to compare two variances (p)	0.232885	0.00805629	5.26783e-05	7.58615e-05	0.309274	0.530037	2.50395e-05	8.21809e-06	0.000953612	7.33409e-07	0.00371796	2.72068e-06	0.00211405	1.8256e-05	1.44957e-05	2.2113e-07	1.74437e-07	5.86289e-08	2.25475e-09	2.8216e-06	1.8681e-07	8.54081e-09	1.95204e-07	8.09719e-10	0.440496	0.197236	0.217778	0.888337	0.145562	0.447872	0.0031613	0.52067	0.561054	3.88578e-14	0.331067	0.0603111	0.0134223	0.0845492	0.159606	0.947907	0.116613	0.713205	0.0241238	0.0020965	0.140932	0.166068
			Student's t-test (t)	0.283843	0.0422422	-1.02697	-0.747853	-0.526959	-0.151793	1.16902	0.925194	1.04953	1.74429	1.61661	1.74598	1.51869	1.87183	1.72297	1.75419	1.73013	1.80101	1.70809	2.25071	2.14481	1.73783	2.1734	1.89123	2.2348	1.69073	1.87253	1.50275	1.87674	1.49484	3.2406	1.55713	1.81022	1.06398	2.23769	1.20814	3.29114	2.6293	2.03944	2.50643	1.45731	1.39643	3.62012	2.92414	2.01614	2.06345
			Student's t-test (p)	0.778619	0.967039	0.328691	0.471723	0.602372	0.880569	0.255028	0.365284	0.304226	0.0962459	0.117837	0.095631	0.141005	0.0748341	0.0992661	0.0947216	0.0990604	0.0870052	0.103609	0.0353938	0.044466	0.0980262	0.0419632	0.0737131	0.0335892	0.101992	0.0720014	0.1441	0.0710111	0.146142	0.00357724	0.130671	0.0810069	0.300651	0.0333786	0.237098	0.00272741	0.0137403	0.0509442	0.018279	0.156157	0.173557	0.00120785	0.00737036	0.0534707	0.0488043
			Student's t-test (power)	0.0558848	0.0501345	0.132171	0.0930627	0.0715657	0.0519703	0.92959	0.865619	0.592574	1	0.798471	0.999997	0.795288	0.999901	0.999667	1	1	1	1	1	1	1	1	1	0.737573	0.612737	0.684129	0.328205	0.742779	0.409842	0.999949	0.418577	0.520029	1	0.780088	0.479894	0.998767	0.977224	0.799238	0.700553	0.554332	0.24704	0.999444	0.999744	0.804924	0.800304
			Wilcoxon signed-rank test (W)	119	109	87	98	104	97	105	89	94	157	146	155	149	156	153	154	151	155	146	162	169	155	159	167	155	134	135	139	147	132	149	139	141	135	148	120	156	156	143	155	129	148	157	160	146	140
			Wilcoxon signed-rank test (p)	0.422273	0.24287	0.588437	0.948316	0.879765	0.432655	0.845779	0.649616	0.871432	0.0110795	0.0439194	0.0145815	0.0311152	0.0127294	0.0189741	0.0166571	0.0244242	0.0145815	0.0439194	0.00528693	0.0016219	0.0145815	0.00831925	0.00231712	0.0145815	0.142583	0.0694066	0.0905702	0.0392466	0.168639	0.00364365	0.0905702	0.0744606	0.130729	0.0349888	0.397431	0.0127294	0.0127294	0.0606921	0.0145815	0.213911	0.0349888	0.00343984	0.00200929	0.0439194	0.0396243
			fold change	1.10889	1.01679	0.577143	0.470833	0.636387	0.867004	2.31723	2.12448	2.10349	6.13545	3.19545	5.68503	3.23266	4.86421	4.75097	6.34046	6.12097	6.59679	7.30441	5.97185	6.45449	5.69975	4.40516	6.5782	2.15278	1.74729	1.87779	1.60867	2.13098	1.49972	3.02554	1.73131	1.69921	9.27128	1.79788	1.37359	2.31507	2.51909	1.8179	1.85953	1.48629	1.62193	2.79331	3.77218	1.69124	1.90055
			log2(fold change)	0.149111	0.0240278	-0.792999	-1.08671	-0.652024	-0.20589	1.2124	1.08711	1.07278	2.61717	1.67602	2.50717	1.69272	2.28221	2.24822	2.66459	2.61376	2.72176	2.86877	2.57818	2.6903	2.5109	2.13919	2.71769	1.1062	0.805119	0.909032	0.685864	1.09152	0.584698	1.59719	0.791866	0.764865	3.21277	0.846299	0.457955	1.21105	1.3329	0.862277	0.894934	0.571713	0.697713	1.48198	1.9154	0.758085	0.926416
			robust fold change	1.64121	1.59937	0.97086	1.01845	1.3632	2.06804	0.989043	0.806883	1.03804	9.87309	5.97439	10.3562	11.2409	9.26771	11.0716	6.8179	5.75688	5.88584	2.18943	9.94323	4.34062	3.30574	2.37895	2.89693	4.5993	2.01785	2.51401	2.73943	2.63012	1.63798	2.51851	2.16468	1.75041	1.8229	2.00054	1.47084	2.26949	2.92993	2.14451	2.23768	1.42611	2.04979	3.29888	7.2877	1.73868	2.21641
			log2(robust fold change)	0.714761	0.677505	-0.0426651	0.0263802	0.446997	1.04826	-0.0158945	-0.309569	0.053864	3.3035	2.57879	3.37243	3.49069	3.21221	3.46879	2.76933	2.52529	2.55725	1.13055	3.31372	2.1179	1.72497	1.25033	1.53453	2.20142	1.01282	1.32999	1.45387	1.39513	0.711921	1.33257	1.11415	0.807694	0.866236	1.00039	0.556638	1.18237	1.55086	1.10065	1.16201	0.512087	1.03547	1.72198	2.86546	0.797989	1.14822
			fold change - bootsrap resampling method	1.36854	1.22615	0.706181	1.02422	1.30433	2.64698	2.59392	2.35999	2.78578	11.9649	6.63248	11.7159	7.60335	8.74481	8.68464	9.33486	8.65278	8.89457	8.39342	8.63946	7.94275	6.38542	4.76114	7.26792	2.55511	1.88261	2.102	1.78864	2.49055	1.62089	3.29361	2.06763	1.89229	9.69076	1.91186	1.42025	2.45288	2.88165	1.95724	2.0527	1.55975	1.92157	3.08263	4.91306	1.7886	2.07311
			log2(fold change) - bootstrap resampling method	0.452639	0.294131	-0.501891	0.0345208	0.383304	1.40434	1.37513	1.23878	1.47808	3.58073	2.72955	3.55039	2.92664	3.12843	3.11847	3.22263	3.11316	3.15292	3.06926	3.11094	2.98964	2.67478	2.25131	2.86154	1.35338	0.912737	1.07177	0.838864	1.31647	0.696788	1.71967	1.04798	0.920136	3.27661	0.934975	0.506141	1.29447	1.52689	0.968823	1.03752	0.641316	0.942284	1.62416	2.29662	0.838832	1.0518
			95% lower confidence interval	-0.903644	-0.987369	-1.98035	-3.10886	-3.23396	-2.87105	-0.748653	-1.04065	-1.80991	0.173945	-0.432785	0.125512	-0.479729	0.154423	-0.119755	0.158628	0.00600372	0.510572	0.331005	0.654022	1.06385	0.548711	0.784392	1.10795	0.170275	-0.0644988	0.0574318	-0.286678	0.0970466	-0.12761	0.694064	-0.202879	-0.0200705	0.00228612	0.135377	-0.200497	0.475349	0.420432	0.0829141	0.0572242	-0.142006	-0.403628	0.731609	0.709749	0.0698565	0.153234
			95% upper confidence interval	1.93495	1.7083	0.729386	2.1815	2.5544	3.77525	2.80044	2.83396	3.40972	6.04124	5.05948	5.94795	5.3133	5.41521	5.56231	5.22014	5.12657	5.0301	4.61786	5.10509	4.49691	4.07288	3.42429	4.18845	2.60794	1.8233	2.1804	1.9143	2.49683	1.54501	2.7355	2.27146	1.91759	5.025	1.74002	1.14151	2.1553	2.69786	1.92839	2.12193	1.36657	2.04794	2.55137	3.88531	1.62421	1.89654
		ROC Analysis	AUC	0.595	0.641176	0.565	0.51	0.52	0.598765	0.525	0.555	0.522222	0.785	0.73	0.775	0.745	0.78	0.765	0.77	0.755	0.775	0.73	0.81	0.845	0.775	0.795	0.835	0.775	0.67	0.710526	0.695	0.735	0.66	0.827778	0.695	0.705	0.675	0.74	0.6	0.78	0.78	0.715	0.775	0.645	0.74	0.826316	0.842105	0.73	0.736842
			AUC (se)	0.108853	0.108766	0.110903	0.11338	0.113053	0.114653	0.112869	0.111477	0.11707	0.0837923	0.0933216	0.0856775	0.0909216	0.0847437	0.087493	0.0865939	0.0892405	0.0856775	0.0933216	0.0787599	0.0708804	0.0856775	0.0818352	0.0732381	0.0856775	0.101533	0.0974871	0.0983747	0.0925376	0.102693	0.0774492	0.0983747	0.0970075	0.10093	0.0917376	0.108463	0.0847437	0.0847437	0.0955795	0.0856775	0.104327	0.0917376	0.0764411	0.0727788	0.0933216	0.0935111
			AUC(p)	0.331285	0.258171	0.384743	0.482412	0.464758	0.333338	0.455908	0.402575	0.462193	0.0445058	0.108919	0.0542629	0.0889393	0.0492633	0.0649614	0.059498	0.0765419	0.0542629	0.108919	0.0245336	0.00747314	0.0542629	0.035741	0.0110962	0.0542629	0.201249	0.140123	0.160816	0.102086	0.217984	0.0171689	0.160816	0.145343	0.192989	0.0954233	0.322405	0.0492633	0.0492633	0.130354	0.0542629	0.243548	0.0954233	0.0164039	0.00937889	0.108919	0.102688
			Sensitivity	0.8	0.941176	0.2	0.2	0.8	0.777778	0.2	0.6	1	0.75	0.85	0.65	0.9	0.85	0.85	0.75	0.75	0.75	0.75	0.85	0.85	0.9	0.75	0.65	0.6	0.9	0.894737	0.9	0.5	0.75	0.722222	0.6	0.75	0.65	0.6	0.4	0.6	0.6	0.55	0.75	0.55	0.65	0.842105	0.789474	0.45	0.842105
			Specificity	0.6	0.5	1	0.95	0.4	0.555556	1	0.6	0.222222	0.8	0.6	0.8	0.6	0.7	0.7	0.8	0.8	0.8	0.7	0.7	0.8	0.6	0.8	0.9	0.9	0.5	0.5	0.6	0.9	0.6	0.9	0.8	0.7	0.8	0.9	1	1	0.9	0.9	0.9	0.8	0.9	0.7	0.8	1	0.6
			Positive predictive value	0.8	0.761905	1	0.666667	0.727273	0.777778	1	0.428571	0.740741	0.882353	0.809524	0.866667	0.818182	0.85	0.85	0.882353	0.882353	0.882353	0.833333	0.85	0.894737	0.818182	0.882353	0.928571	0.923077	0.782609	0.772727	0.818182	0.909091	0.789474	0.928571	0.857143	0.833333	0.866667	0.923077	1	1	0.923077	0.916667	0.9375	0.846154	0.928571	0.842105	0.882353	1	0.8
			Negative predictive value	0.6	0.833333	0.714286	0.703704	0.5	0.555556	0.384615	0.75	1	0.615385	0.666667	0.533333	0.75	0.7	0.7	0.615385	0.615385	0.615385	0.583333	0.7	0.727273	0.75	0.615385	0.5625	0.529412	0.714286	0.714286	0.75	0.473684	0.545455	0.642857	0.5	0.583333	0.533333	0.529412	0.454545	0.555556	0.529412	0.5	0.642857	0.470588	0.5625	0.7	0.666667	0.47619	0.666667
			Precision	0.8	0.761905	1	0.666667	0.727273	0.777778	1	0.428571	0.740741	0.882353	0.809524	0.866667	0.818182	0.85	0.85	0.882353	0.882353	0.882353	0.833333	0.85	0.894737	0.818182	0.882353	0.928571	0.923077	0.782609	0.772727	0.818182	0.909091	0.789474	0.928571	0.857143	0.833333	0.866667	0.923077	1	1	0.923077	0.916667	0.9375	0.846154	0.928571	0.842105	0.882353	1	0.8
			Recall	0.8	0.941176	0.2	0.2	0.8	0.777778	0.2	0.6	1	0.75	0.85	0.65	0.9	0.85	0.85	0.75	0.75	0.75	0.75	0.85	0.85	0.9	0.75	0.65	0.6	0.9	0.894737	0.9	0.5	0.75	0.722222	0.6	0.75	0.65	0.6	0.4	0.6	0.6	0.55	0.75	0.55	0.65	0.842105	0.789474	0.45	0.842105
			Youden Index	0.4	0.441176	0.2	0.15	0.2	0.333333	0.2	0.2	0.222222	0.55	0.45	0.45	0.5	0.55	0.55	0.55	0.55	0.55	0.45	0.55	0.65	0.5	0.55	0.55	0.5	0.4	0.394737	0.5	0.4	0.35	0.622222	0.4	0.45	0.45	0.5	0.4	0.6	0.5	0.45	0.65	0.35	0.55	0.542105	0.589474	0.45	0.442105
			Cutoff	1.93538	1.29262	33.0163	12.9803	0.990011	0.715045	14.5804	2.79288	0.117575	0.444529	0.120062	0.0271998	0.0891393	0.086221	0.0310976	0.137272	0.37679	0.106979	0.232768	0.00773769	0.0111003	0.0207453	0.0249966	0.021868	21.8851	1.41027	0.0497493	0.735418	91.4496	5.39652	0.0243528	13.5686	7.37106	0.251235	8.38964	0.725162	0.722213	7.24238	1.82435	0.298256	1.21601	0.3655	0.0519471	0.117629	1.26774	0.13023
[truncated: 211 more columns]

## Sheet: Raw data per chemical class_1
UNTRASFORMED DATA
	SAMPLE.ID	Group	AC	BAs_total	Cer	Cer_PC	ChoE	ChoE_LPC	Chol_PC	DAG	DAPC	DAPE	FAA	FBA	FFA.16.1	FFA.18.1	FFA.18.2	GCBA	Lipids	LPC	LPE	LPI	MAG	MAPC_total	MAPE_total	MAPI	MEMAPC	MEMAPC.O_plasmanyles	MEMAPC.P_plasmenyles	MEMAPE	MEMAPE.O_plasmanyles	MEMAPE.P_plasmenyles	Membrane.Lipids	MEPC.O_plasmanyles	MEPC.P_plasmenyles	MEPE.O_plasmanyles	MEPE.P_plasmenyles	MUFA	NAE	NEFA_omega_3	NEFA_omega_6	NEFA_omega_9	NEFA_total	PC	PC.DHA	PC_20.4	PC_PEMT	PE	PE.DHA
CLASS			Acylcarnitines	Bile Acids	Sphingolipids	Ceramides and PC	Sterols	ChoE and LPC	Cho01 and PC	Glycerolipids	Glycerophospholipids	Glycerophospholipids	Fatty amides	Bile Acids	Non-esterified fatty acids	Non-esterified fatty acids	Non-esterified fatty acids	Bile Acids	All the lipids	Glycerophospholipids	Glycerophospholipids	Glycerophospholipids	Glycerolipids	Glycerophospholipids	Glycerophospholipids	Glycerophospholipids	Glycerophospholipids	Glycerophospholipids	Glycerophospholipids	Glycerophospholipids	Glycerophospholipids	Glycerophospholipids	Glycerophospholipids + Diacylglycerols	Glycerophospholipids	Glycerophospholipids	Glycerophospholipids	Glycerophospholipids	Non-esterified fatty acids	Fatty amides	Non-esterified fatty acids	Non-esterified fatty acids	Non-esterified fatty acids	Non-esterified fatty acids	Glycerophospholipids	Glycerophospholipids	Glycerophospholipids	Glycerophospholipids	Glycerophospholipids	Glycerophospholipids
COMMON NAME OR FUNCTION					Hepatic fatty acid uptake is regulated by the sphingolipid acyl chain length. Biochim Biophys Acta. 2014 Dec;1841(12):1754-66.	Cer and PC		ChoE and LPC	UC and PC	Promote curvature elastic stress in membranes. Proc Natl Acad Sci U S A. 2000 Aug 1;97(16):9032-6.					FFA with 16:1 FA chains	FFA with 18:1 FA chains	FFA with 18:2 FA chains																												PC with 22:6 FA	PC with 20:4 FA(arachidonic acid)	Glycerophospholipids potentially derived from PE methylation		PE with 22:6 FA
INDIVIDUAL NOTATION			Acylcarnitines	Bile Acids	Ceramides		Cholesteryl Esters			Diacylglycerols	Diacylglycerophosphocholine	Diacylglycerophosphoethanolamine	Primary fatty amides	Free bile acids				Glycine-conjugated bile acids	PC+PE+LPC+LPE+PI+LPI+PS+PG+LPG+DAG+TAG+NEFA+SL	Lysophosphatidylcholines	Lysophosphatidylethanolamines	Lysophosphatidylinositols	Total Monoacylglycerols	Monoacylglycerophosphocholine	Monoacylglycerophosphoethanolamine	Monoacylglycerophosphoinositol	1-ether, 2-acylglycerophosphocholines	1-ether, 2-acylglycerophosphocholines O_plasmanyles	1-ether, 2-acylglycerophosphocholines P_plasmenyles	1-ether, 2-acylglycerophosphoethanolamine	1-ether, 2-acylglycerophosphoethanolamine O_plasmanyles	1-ether, 2-acylglycerophosphoethanolamine P_plasmenyles	PC+PE+LPC+LPE+PI+LPI+PS+PG+LPG(+DAG)	1-Monoetherglycerophosphocholine O_plasmanyles	1-Monoetherglycerophosphocholine P_plasmenyles	1-Monoetherglycerophosphoethanolamine O_plasmanyles	1-Monoetherglycerophosphoethanolamine P_plasmenyles	Monounsaturated fatty acids	N-Acyl ethanolamines	NEFA omega 3	NEFA omega 6	NEFA omega 9	Non-esterified fatty acids	Phosphatidylcholines	PC-DHA	PC 20:4	PE PEMT	Phosphatidylethanolamines	PE-DHA
	PD354	PD	0.3032	4.50272	92.9088	286.964	0.352407	464.679	194.056	10.6463	176.349	7.72936	22.186	2.58016	23.8898	101.704	16.8355	1.92257	2029.99	464.327	670.704	60.3005	2.92059	426.78	513.51	60.3005	17.7067	5.91394	11.7927	10.8365	2.99579	6.56535	1806.13	9.22694	28.3197	14.9868	142.207	130.059	51.8709	55.1086	164.785	97.4405	1079.51	194.056	1.85759	18.992	97.2644	18.5659	2.88244
	PD423	PD	18.1591	13.1945	1.93663	395.821	1.01387	2409.39	393.884	7.56709	378.164	0.122733	15.4931	10.9437	20.9616	268.855	72.6555	2.25087	4245.11	2408.37	530.355	180.101	1.21921	2373.37	419.156	180.101	15.7202	7.29864	8.42155	0.227103		0.211431	3563.87	8.0207	26.9851	4.78706	106.412	291.484	73.0422	69.4472	160.357	267.631	2217.88	393.884	5.52803	33.8694	270.956	0.349836	0.0852521
	PD436	PD	6.63243	1.55711	8.70575	197.835	0.0418519	458.18	189.13	2.41794	184.715	3.01381	1.92884	0.52758	8.15186	115.534	18.3085	1.02953	1954.25	458.138	1018.13	131.233	0.224355	450.313	854.366	131.233	4.41455	2.06608	2.34847	3.88559	0.771159	2.42459	1841.09	2.71779	5.10697	7.29718	156.467	124.263	17.1087	149.088	228.949	115.409	1360.1	189.13	3.62573	15.6833	111.822	6.8994	1.29209
	PD520	PD	7.2456	3.64093	2.53118	171.043	0.0728562	313.471	168.512	0.763874	159.887	3.6247	0.400301	0.624552	6.34867	149.893	48.0284	3.01638	1327.48	313.398	657.556	67.5015	0.107632	289.032	516.567	67.5015	8.62464	2.82941	5.79523	4.77961	0.634793	3.9008	1249.17	5.23898	19.1274	6.6823	134.307	157.231	14.2196	242.074	504.919	160.871	1296.18	168.512	3.36582	34.5005	100.898	8.40432	0.988791
	PD530	PD	13.9694	27.1788	5.46384	265.555	0.791345	604.106	260.091	4.26503	250.268	1.28864	4.05872	17.9564	16.5751	275.178	60.6789	9.22247	2664.79	603.315	720.258	69.5998	0.387024	577.692	613.34	69.5998	9.82362	3.98819	5.83543	2.55294	0.328796	1.90564	1695.44	5.25964	20.363	4.26441	102.654	292.948	78.4483	172.392	341.28	274.617	2878.95	260.091	4.34411	32.8435	182.165	3.84158	0.949794
	PD357	PD	0.575317	1.26085	99.8638	193.394	3.22132	347.256	93.5305	25.0567	86.4368	0.745894	10.1574	0.354889	38.1098	287.575	491.931	0.905959	1526.44	344.035	579.836	29.8834	2.71248	313.021	358.553	29.8834	7.0937	2.56319	4.53052	1.53611	0.346797	1.08174	1297.81	7.19036	23.8239	20.0149	201.268	340.041	14.9759	181.062	921.768	287.943	2570.84	93.5305	0.246279	3.92574	49.8907	2.282	0.397736
	PD450	PD	32.4975	102.485	17.5662	613.271	0.131703	473.981	595.704	6.27202	568.942	6.49112	10.6278	25.0941	20.1468	290.746	71.2761	77.3911	2928.03	473.849	1038.77	94.2665	1.32186	441.502	871.887	94.2665	26.7622	11.2575	15.5047	11.0598	1.75926	8.15748	2319.98	10.3879	21.9586	12.1344	154.752	312.604	100.689	261.098	512.456	293.605	2729.89	595.704	7.3216	59.9717	384.671	17.5509	2.45635
	PD495	PD	24.5978	12.5545	6.27901	227.087	0.187838	519.01	220.808	1.986	212.725	3	1.5413	4.40365	7.31632	197.462	52.8042	8.15087	2557.5	518.822	1091.76	112.051	0.264734	489.003	937.545	112.051	8.08226	2.9917	5.09056	4.19696	0.73086	3.11746	1990.79	9.15035	20.6691	8.97223	145.241	205.678	40.1738	324.626	539.317	203.003	2101.91	220.808	3.37724	28.4413	142.264	7.19695	0.896529
	PD501	PD	17.7776	11.5939	0.514368	44.4849	0.103245	341.141	43.9705	0.588955	42.2854	0.438271	0.683071	6.43307	60.6873	289.801	81.9942	5.16083	2205.65	341.037	912.288	73.8282	0.0417762	313.915	796.581	73.8282	1.68513	0.647719	1.03741	0.550536	0.06516	0.428183	1381.39	8.41118	18.7117	6.0738	109.633	351.604	68.0291	172.611	335.124	286.2	2522.34	43.9705	0.75727	5.97175	28.6238	0.988807	0.185501
	PD537	PD	28.6399	25.8264	1.15456	61.2237	0.109187	589.738	60.0691	0.341677	56.5809	1.19905	0.178165	16.9408	11.9941	228.725	68.5538	8.88563	1806.95	589.629	815.237	77.1518	0.0258852	555.147	691.057	77.1518	3.48816	1.52886	1.9593	1.79071	0.237855	1.42871	1558.55	13.8848	20.5974	9.18056	114.999	241.535	15.1152	274.718	597.158	237.117	1684.28	60.0691	1.73043	9.74437	34.4643	2.98976	0.382341
	PD550	PD	26.4252	7.42524	2.44682	118.386	0.138806	588.92	115.939	0.896901	106.623	2.81549	0.576709	1.69911	27.7032	360.787	130.199	5.72613	1945.36	588.781	777.808	140.154	0.0762885	559.961	591.031	140.154	9.31612	2.78963	6.52649	3.19277	0.312523	2.75218	1649.15	4.88771	23.9322	8.93329	177.844	389.783	23.8728	165.138	460.856	362.861	1851.98	115.939	2.34798	26.2185	68.5454	6.00825	0.577318
	PD562	PD	21.9036	5.58015	1.21678	89.78	0.0840998	257.827	88.5632	2.10066	84.5133	0.492644	2.07302	3.0927	16.6925	370.969	82.8793	2.48745	1468.34	257.743	414.304	39.4597	0.258676	243.63	360.724	39.4597	4.04988	1.42685	2.62303	1.22263	0.160976	0.915077	815.571	2.87127	11.2415	2.25125	51.3285	389.426	72.029	203.436	447.04	375.084	3086.11	88.5632	1.36705	10.5485	62.0469	1.71527	0.306544
	PD636	PD	27.1398	240.484	0.210684	14.9524	0.0197304	282.825	14.7418	0.102495	13.9663	0.24336	0.0279023	152.011	12.7799	234.827	94.3063	88.4735	1391.17	282.805	671.377	69.2955	0.00759614	259.401	546.421	69.2955	0.775462	0.295102	0.48036	0.346928	0.0566555	0.268277	1041.62	7.74259	15.6609	5.81283	119.143	248.352	35.2539	425.254	742.535	241.946	2080.61	14.7418	0.316376	2.43385	8.81818	0.590288	0.0691461
	PD295	PD	18.3308	21.0011	2.87156	224.486	0.196359	822.398	221.615	2.3615	212.45	2.75511	2.41293	8.51355	47.0287	402.501	106.27	12.4876	3101.18	822.202	1403.54	139.382	0.276377	776.406	1181.56	139.382	9.16409	3.56148	5.60262	4.14084	0.742871	3.07009	2634.43	11.3095	34.4862	11.1132	210.867	451.375	96.932	351.412	790.072	413.913	3750.72	221.615	2.80776	30.6464	138.273	6.89595	0.877989
	PD340	PD	25.1769	248.001	3.45177	232.667	0.0742069	545.067	229.215	1.67471	221.566	2.03816	1.53936	10.8516	12.2826	221.174	54.326	237.15	2113.99	544.993	875.563	95.0063	0.291271	517.724	734.024	95.0063	7.64866	3.5955	4.05316	2.78057	0.404571	2.07773	1790.42	9.93409	17.3346	8.84667	132.692	235.088	62.5157	171.353	344.733	221.714	2048.24	229.215	3.02921	24.5067	146.634	4.81873	0.733768
	PD356	PD	0.565469	14.7791	14.522	221.251	0.356087	317.814	206.729	6.47727	198.371	2.63694	1.87016	5.01073	6.58379	87.7487	18.3898	9.76837	1314.67	317.457	455.623	19.4214	0.323795	311.506	383.505	19.4214	8.35829	4.06782	4.29047	3.65898	0.565172	2.77461	1063.07	1.69641	4.25464	3.86858	68.2488	97.7958	83.3979	252.239	636.091	71.7217	2018.39	206.729	2.47499	22.5472	130.52	6.29592	0.670692
	PD541	PD	11.9353	18.4111	5.74548	256.43	0.21131	553.009	250.684	3.02144	242.512	2.53176	1.58384	3.63168	13.2955	220.79	61.2708	14.7794	2114.67	552.797	663.785	68.3944	0.495419	535.569	561.999	68.3944	8.17205	3.35775	4.81431	3.49991	0.561898	2.63082	1592.28	4.00802	13.2203	6.0295	95.7569	234.661	49.7602	148.643	281.147	220.677	1975	250.684	4.21966	34.3479	169.325	6.03167	1.01063
	PD546	PD	30.989	36.59	0.575356	90.6275	0.104367	507.301	90.0521	0.354785	85.1249	1.21596	0.144898	6.29876	6.64951	200.024	66.046	30.2912	1881.44	507.197	993.773	58.8212	0.0627821	481.521	867.653	58.8212	4.92719	2.22509	2.7021	1.56057	0.238845	1.18829	1672.66	9.03985	16.6358	7.18771	118.932	207.8	33.5352	212.283	496.787	203.193	1650.41	90.0521	1.99282	13.936	54.5487	2.77652	0.430631
	PD579	PD	22.2111	80.6118	10.1479	262.401	0.151557	262.954	252.253	3.38966	243.785	2.46257	2.35172	50.2231	17.8406	195.505	35.8434	30.3887	2095.08	262.803	994.44	49.0011	0.388712	246.714	822.494	49.0011	8.46845	3.69384	4.77461	3.49722	0.558509	2.57728	1613.04	5.56197	10.5267	10.1653	161.781	214.142	45.0623	160.936	275.131	191.918	2061.46	252.253	3.46487	28.5168	165.963	5.95979	1.07792
	PD591	PD	13.3283	3.03021	7.03637	170.294	0.131934	466.066	163.258	1.72779	155.862	2.73844	0.790771	2.22267	9.67299	169.56	44.4166	0.807539	2055.15	465.934	997.159	93.0513	0.180118	437.148	784.854	93.0513	7.39608	2.37757	5.0185	3.82751	0.897736	2.73418	1754.97	6.11866	22.6674	9.48275	202.822	180.607	30.9582	138.429	378.732	171.47	1556.18	163.258	2.02731	24.0725	102.307	6.56595	0.573241
	C022	Control	26.4597	16.6754	1.35721	50.3657	0.0717353	724.166	49.0085	0.295414	45.7779	1.24249	0.181727	2.03744	7.42284	187.833	58.8053	14.638	2357.78	724.094	1198.91	139.877	0.0256215	680.874	937.662	139.877	3.23062	1.33363	1.89699	1.77255	0.376629	1.30139	2128.48	13.0845	30.1358	15.6557	245.595	196.383	37.6521	171.691	358.467	191.322	1458.83	49.0085	1.16511	7.33551	27.8671	3.01504	0.341639
	C023	Control	10.4601	11.5227	0.0177549	2.98357	0.00141669	71.4942	2.96582	0.0174482	2.70784	0.0771227	0.00195106	1.22807	10.6314	116.289	53.5497	10.2947	329.792	71.4928	150.77	69.5565	0.00019685	50.9435	100.368	69.5565	0.257974	0.0982698	0.159704	0.0726898	0.0128833	0.0558662	295.671	6.0775	14.4717	2.85625	47.5451	127.08	9.01683	71.5475	127.012	115.272	401.612	2.96582	0.244072	0.597027	1.75843	0.149812	0.0282098
	C030	Control	18.1092	14.4654	8.82661	289.209	0.13245	436.143	280.382	3.47315	268.998	3.57892	2.28877	12.4028	16.8236	314.382	78.4734	2.06256	2985.25	436.01	1311.31	71.2819	0.450396	396.368	1114.77	71.2819	11.384	4.47567	6.90833	5.49981	0.878779	4.18073	2161.52	13.5441	26.0982	11.0072	185.534	332.587	78.1433	257.111	445.044	311.233	3384.9	280.382	3.47105	28.7963	184.653	9.07873	1.40963
	C008	Control	22.0872	196.905	2.00702	173.603	0.197656	426.847	171.596	1.18342	165.348	1.222	0.925774	186.941	11.0223	233.752	55.0744	9.96447	1682.16	426.649	557.473	57.1874	0.189347	410.547	480.724	57.1874	6.24776	2.88997	3.3578	1.7177	0.273953	1.24745	1247.51	5.22012	10.8814	4.56893	72.1806	245.941	50.6968	176.99	341.298	234.81	2120.64	171.596	2.36043	18.4934	110.451	2.9397	0.573362
	C015	Control	4.41126	64.1083	0.575124	133.504	0.0159458	243.981	132.929	0.216253	128.004	2.10888	0.178959	35.9204	2.77989	83.9071	22.6888	28.1879	1416.33	243.965	791.512	141.377	0.0568834	226.783	653.338	141.377	4.92424	1.86587	3.05837	2.18562	0.365299	1.53201	1337.74	4.58985	12.5921	11.1097	127.064	86.9086	16.6638	206.032	316.139	86.2112	950.309	132.929	3.05917	14.5909	77.0382	4.2945	0.880355
	C026	Control	102.829	37.7792	0.19184	14.9079	0.0242266	612.619	14.716	0.123464	13.9488	0.514569	0.0855331	2.56586	20.6981	352.594	153.206	35.2134	2623.87	612.595	1580.27	160.702	0.00656257	549.775	1305.33	160.702	0.767209	0.323437	0.443772	0.449322	0.123652	0.287906	2373.49	17.7494	45.0704	11.7344	263.202	375.441	39.5693	240.835	577.489	360.543	2231.49	14.716	0.610333	2.20554	9.40119	0.963891	0.165153
	C032	Control	51.8093	20.766	0.138075	25.8735	0.0852462	637.843	25.7355	0.104931	24.8735	0.395344	0.0350039	5.5174	9.40178	217.174	80.7492	15.2486	1867.79	637.758	843.084	93.5351	0.0123071	600.112	686.344	93.5351	0.861931	0.420217	0.441714	0.439729	0.0589654	0.34273	1606.22	15.039	22.6069	10.76	145.98	227.27	24.9041	221.323	424.438	217.587	1508.59	25.7355	1.57292	3.92598	17.1127	0.835074	0.126831
	C054	Control	12.3895	12.4231	0.881577	118.991	0.0431902	521.181	118.109	0.422407	114.064	2.75272	0.290101	11.185	4.2143	109.62	36.2547	1.23802	1861.7	521.138	939.217	106.171	0.0537241	504.594	774.266	106.171	4.04468	1.72609	2.31859	2.423	0.320368	1.73166	1711.58	4.97258	11.5707	6.41554	158.536	114.397	24.0804	109.71	266.912	110.95	887.975	118.109	2.29558	15.5478	69.2692	5.17573	0.736411
	C064	Control	1.3884	4.31024	14.3085	152.619	0.0553928	363.699	138.311	0.995437	133.104	2.77964	0.644734	0.325149	2.5581	70.8945	12.7995	3.98509	1160.46	363.644	468.943	131.488	0.0617468	355.102	372.673	131.488	5.20671	1.98163	3.22508	4.00956	1.12528	2.62698	1138.47	2.46097	6.08135	5.23037	91.0402	73.8137	6.23734	101.985	193.894	75.2256	605.562	138.311	1.40657	14.0696	80.5155	6.7892	0.593951
	C076	Control	4.17817	2.14281	0.373519	24.1034	0.0310328	317.774	23.7298	0.129189	22.3068	0.942225	0.0343082	0.980259	4.80955	106.16	33.6837	1.16255	1161.55	317.743	667.187	92.2132	0.0141271	305.171	539.601	92.2132	1.42304	0.552496	0.870547	1.00494	0.174594	0.728187	1107.51	2.63415	9.9378	6.07833	121.507	111.296	23.2902	165.28	279.317	107.921	925.461	23.7298	1.29273	3.82222	12.7364	1.94717	0.392186
		GROUPS	ANALYSIS	AC	BAs_total	Cer	Cer_PC	ChoE	ChoE_LPC	Chol_PC	DAG	DAPC	DAPE	FAA	FBA	FFA.16.1	FFA.18.1	FFA.18.2	GCBA	Lipids	LPC	LPE	LPI	MAG	MAPC_total	MAPE_total	MAPI	MEMAPC	MEMAPC.O_plasmanyles	MEMAPC.P_plasmenyles	MEMAPE	MEMAPE.O_plasmanyles	MEMAPE.P_plasmenyles	Membrane.Lipids	MEPC.O_plasmanyles	MEPC.P_plasmenyles	MEPE.O_plasmanyles	MEPE.P_plasmenyles	MUFA	NAE	NEFA_omega_3	NEFA_omega_6	NEFA_omega_9	NEFA_total	PC	PC.DHA	PC_20.4	PC_PEMT	PE
			Class	Acylcarnitines	Bile Acids	Sphingolipids	Ceramides and PC	Sterols	ChoE and LPC	Cho01 and PC	Glycerolipids	Glycerophospholipids	Glycerophospholipids	Fatty amides	Bile Acids	Non-esterified fatty acids	Non-esterified fatty acids	Non-esterified fatty acids	Bile Acids	All the lipids	Glycerophospholipids	Glycerophospholipids	Glycerophospholipids	Glycerolipids	Glycerophospholipids	Glycerophospholipids	Glycerophospholipids	Glycerophospholipids	Glycerophospholipids	Glycerophospholipids	Glycerophospholipids	Glycerophospholipids	Glycerophospholipids	Glycerophospholipids + Diacylglycerols	Glycerophospholipids	Glycerophospholipids	Glycerophospholipids	Glycerophospholipids	Non-esterified fatty acids	Fatty amides	Non-esterified fatty acids	Non-esterified fatty acids	Non-esterified fatty acids	Non-esterified fatty acids	Glycerophospholipids	Glycerophospholipids	Glycerophospholipids	Glycerophospholipids	Glycerophospholipids
			Common name or function			Hepatic fatty acid uptake is regulated by the sphingolipid acyl chain length. Biochim Biophys Acta. 2014 Dec;1841(12):1754-66.	Cer and PC		ChoE and LPC	UC and PC	Promote curvature elastic stress in membranes. Proc Natl Acad Sci U S A. 2000 Aug 1;97(16):9032-6.					FFA with 16:1 FA chains	FFA with 18:1 FA chains	FFA with 18:2 FA chains																												PC with 22:6 FA	PC with 20:4 FA(arachidonic acid)	Glycerophospholipids potentially derived from PE methylation
			Individual notation	Acylcarnitines	Bile Acids	Ceramides		Cholesteryl Esters			Diacylglycerols	Diacylglycerophosphocholine	Diacylglycerophosphoethanolamine	Primary fatty amides	Free bile acids				Glycine-conjugated bile acids	PC+PE+LPC+LPE+PI+LPI+PS+PG+LPG+DAG+TAG+NEFA+SL	Lysophosphatidylcholines	Lysophosphatidylethanolamines	Lysophosphatidylinositols	Total Monoacylglycerols	Monoacylglycerophosphocholine	Monoacylglycerophosphoethanolamine	Monoacylglycerophosphoinositol	1-ether, 2-acylglycerophosphocholines	1-ether, 2-acylglycerophosphocholines O_plasmanyles	1-ether, 2-acylglycerophosphocholines P_plasmenyles	1-ether, 2-acylglycerophosphoethanolamine	1-ether, 2-acylglycerophosphoethanolamine O_plasmanyles	1-ether, 2-acylglycerophosphoethanolamine P_plasmenyles	PC+PE+LPC+LPE+PI+LPI+PS+PG+LPG(+DAG)	1-Monoetherglycerophosphocholine O_plasmanyles	1-Monoetherglycerophosphocholine P_plasmenyles	1-Monoetherglycerophosphoethanolamine O_plasmanyles	1-Monoetherglycerophosphoethanolamine P_plasmenyles	Monounsaturated fatty acids	N-Acyl ethanolamines	NEFA omega 3	NEFA omega 6	NEFA omega 9	Non-esterified fatty acids	Phosphatidylcholines	PC-DHA	PC 20:4	PE PEMT	Phosphatidylethanolamines
		PD	Mean	17.4202	43.9855	14.2574	206.898	0.374704	556.256	192.64	4.10064	184.056	2.3792	4.0313	16.4707	19.2355	233.468	83.8507	27.5148	2136.36	555.882	814.113	83.3952	0.579329	529.968	670.341	83.3952	8.58387	3.42379	5.16008	3.45719	0.651065	2.5105	1716.57	7.13294	18.7812	8.40423	135.368	254.824	50.3495	206.567	457.962	234.917	2126.05	192.64	2.81011	23.0859	122.5	5.83639
			90% Winsored mean	17.3579	43.6244	13.9249	197.502	0.265437	477.163	184.011	3.39208	175.933	2.32332	3.70251	11.3899	18.5644	232.589	65.8377	20.0859	2079.81	476.826	800.59	81.9209	0.569838	450.274	658.249	81.9209	8.17658	3.24348	5.00233	3.45202	0.651512	2.43373	1681.4	7.05524	18.5154	8.23369	135.812	253.068	50.1995	203.592	451.598	234.261	2103.65	184.011	2.72393	21.8869	117.805	5.79766
			Median	18.245	13.9868	4.45781	209.543	0.13537	470.023	191.593	2.23108	180.532	2.49716	1.727	5.65474	14.9353	224.95	63.6584	8.51825	2042.57	469.892	796.522	71.714	0.270556	445.908	652.198	71.714	8.12716	2.91055	4.79446	3.345	0.558509	2.50093	1660.9	7.46648	19.7452	8.07192	133.5	238.312	47.4113	176.836	453.948	229.415	2054.85	191.593	2.64137	24.2896	107.065	5.98402
			SEM	2.29907	16.3825	6.37204	29.9212	0.159958	102.621	29.3549	1.26678	28.208	0.435672	1.32941	7.59443	3.2356	19.455	22.4327	12.3056	157.552	102.595	55.0184	9.08554	0.188238	101.764	49.3688	9.08554	1.31574	0.549097	0.789334	0.649577	0.157552	0.440863	135.563	0.705191	1.67169	0.913587	9.55927	21.6021	6.21037	20.1835	46.1801	20.0799	145.957	29.3549	0.386009	3.04984	19.6862	1.08095
			SD	10.2818	73.2646	28.4966	133.811	0.715356	458.936	131.279	5.66521	126.15	1.94838	5.9453	33.9633	14.47	87.0053	100.322	55.0325	704.592	458.819	246.05	40.6318	0.841826	455.103	220.784	40.6318	5.88419	2.45564	3.53001	2.905	0.686753	1.9716	606.257	3.15371	7.47602	4.08568	42.7504	96.6075	27.7736	90.2635	206.524	89.7999	652.737	131.279	1.72629	13.6393	88.0394	4.83417
			Coefficient of Variation	0.590222	1.66566	1.99872	0.646752	1.90912	0.825045	0.681472	1.38154	0.685389	0.818924	1.47478	2.06205	0.752256	0.372665	1.19644	2.00011	0.32981	0.825389	0.30223	0.48722	1.4531	0.858736	0.329361	0.48722	0.685493	0.717227	0.6841	0.840278	1.05482	0.785343	0.353179	0.442133	0.398059	0.486146	0.315809	0.379115	0.551617	0.436969	0.450963	0.382263	0.307019	0.681472	0.614313	0.590807	0.718688	0.828281
			IQR	14.7261	24.2208	7.30961	146.476	0.148125	226.677	141.921	3.90313	140.694	1.77585	2.1679	9.95215	12.4009	99.1127	35.09	16.229	556.787	226.651	332.892	39.3368	0.315593	227.821	314.659	39.3368	4.40307	1.58209	3.12295	2.39495	0.461182	1.68683	454.376	4.01834	7.90572	3.67806	48.9676	120.053	43.0954	96.4802	232.147	99.8293	858.655	141.921	1.67929	18.1066	91.2938	4.24392
			Kurtosis	-1.22482	2.65703	3.99476	1.92086	9.59049	10.3334	2.09076	6.51624	1.98278	1.14238	2.22797	9.74802	1.3472	-0.83008	10.7252	7.65948	1.60342	10.3288	-0.437365	-0.348471	2.15487	10.4968	-0.692296	-0.348471	2.26735	2.80487	1.67553	1.66432	4.60299	1.56125	2.04648	-0.803637	-0.378242	1.08211	-0.733787	-0.942861	-1.28914	-0.0675022	-0.605129	-0.667868	-0.0930261	2.09076	0.300314	0.439985	1.66747	1.39214
			Skewness	-0.328538	1.9978	2.35784	1.17855	3.15667	3.23831	1.31554	2.53244	1.29279	1.22443	1.80452	3.18735	1.46563	0.161355	3.3127	2.81733	1.27276	3.23739	0.353578	0.609603	1.85008	3.27031	0.331233	0.609603	1.46637	1.62577	1.33624	1.47933	2.19089	1.34762	1.29743	0.12784	-0.139107	1.05097	0.0543566	0.256563	0.254351	0.591698	0.499844	0.117748	0.611125	1.31554	0.701728	0.583758	1.29152	1.36918
			Shapiro test (W)	0.937175	0.594514	0.494197	0.889074	0.473761	0.517093	0.872648	0.647159	0.875843	0.850575	0.667095	0.477125	0.805894	0.971166	0.503157	0.522057	0.872709	0.51713	0.963451	0.950746	0.646021	0.508306	0.954488	0.950746	0.835322	0.829137	0.861938	0.792655	0.702482	0.845047	0.878278	0.98155	0.97817	0.920352	0.97455	0.974015	0.939094	0.947803	0.961355	0.979717	0.961106	0.872648	0.95177	0.934854	0.882012	0.816153
			Shapiro test (p)	0.211929	2.58493e-06	2.81808e-07	0.0258591	1.85655e-07	4.55545e-07	0.013082	9.44996e-06	0.0149066	0.00545001	1.58918e-05	1.98715e-07	0.00105917	0.779285	3.39521e-07	5.0647e-07	0.0131149	4.55903e-07	0.614835	0.378557	9.17841e-06	3.78242e-07	0.440371	0.378557	0.00305539	0.00243068	0.008505	0.000672759	5.95165e-05	0.00440802	0.0164771	0.952503	0.908346	0.100642	0.846472	0.836316	0.230499	0.334975	0.571271	0.930392	0.566167	0.013082	0.39476	0.191375	0.0192335	0.00151989
			Box-Cox Transformation (lambda)	1.4	-0.1	-0.1	0.5	-0.2	-0.9	0.4	0.1	0.4	0.4	0.1	0	-0.3	0.8	-0.2	-0.1	-0.6	-0.9	0.4	0.5	0.1	-0.9	0.5	0.5	0.4	0.3	0.4	0.3	0.1	0.4	-0.2	0.8	1.2	0.2	0.9	0.6	0.7	0.6	0.4	0.9	0.1	0.4	0.6	0.6	0.4	0.3
		Control	Mean	25.4122	38.1098	2.86772	98.6159	0.0658292	435.575	95.7482	0.696111	91.9134	1.56139	0.466686	25.9103	9.03618	179.261	58.5285	12.1995	1744.67	435.509	850.868	106.339	0.0870913	408.027	696.508	106.339	3.83482	1.56673	2.26809	1.95749	0.371041	1.40349	1510.82	8.53721	18.9446	8.54163	145.818	189.112	31.0254	172.25	333.001	181.107	1447.54	95.7482	1.7478	10.9384	59.0803	3.51889
			90% Winsored mean	25.4122	38.1098	2.86772	98.6159	0.0658292	435.575	95.7482	0.696111	91.9134	1.56139	0.466686	25.9103	9.03618	179.261	58.5285	12.1995	1744.67	435.509	850.868	106.339	0.0870913	408.027	696.508	106.339	3.83482	1.56673	2.26809	1.95749	0.371041	1.40349	1510.82	8.53721	18.9446	8.54163	145.818	189.112	31.0254	172.25	333.001	181.107	1447.54	95.7482	1.7478	10.9384	59.0803	3.51889
			Median	15.2494	15.5704	0.728351	84.6782	0.0492915	431.495	83.5588	0.255833	79.9211	1.23225	0.180343	4.04163	8.41231	152.061	54.312	10.1296	1771.93	431.33	817.298	99.8529	0.0396728	403.458	669.841	99.8529	3.63765	1.52986	2.10779	1.74513	0.29716	1.27442	1471.98	5.64881	13.5319	8.58776	136.522	161.731	24.4922	174.34	328.719	153.297	1204.57	83.5588	1.48975	10.7026	48.5681	2.97737
			SEM	9.78541	18.5634	1.51869	29.0252	0.0189821	62.4725	28.0841	0.332735	27.0279	0.373161	0.223412	18.2106	1.90931	31.2297	12.6408	3.6838	247.47	62.4666	134.676	11.206	0.0439501	59.127	112.705	11.206	1.07056	0.429464	0.645171	0.539109	0.113735	0.394558	196.517	1.79503	3.79872	1.2826	22.2354	33.211	6.81061	19.5833	40.923	31.3187	287.917	28.0841	0.326825	2.8213	18.2362	0.901201
			SD	30.9442	58.7027	4.80252	91.7857	0.0600267	197.555	88.8096	1.0522	85.4696	1.18004	0.706491	57.587	6.03777	98.7571	39.9738	11.6492	782.568	197.537	425.882	35.4363	0.138983	186.976	356.404	35.4363	3.38541	1.35808	2.04021	1.70481	0.35966	1.2477	621.441	5.67639	12.0126	4.05595	70.3144	105.022	21.537	61.9277	129.41	99.0385	910.474	88.8096	1.03351	8.92174	57.6681	2.84985
			Coefficient of Variation	1.21769	1.54036	1.67468	0.930739	0.911856	0.453551	0.927533	1.51154	0.929893	0.75576	1.51385	2.22255	0.668177	0.550914	0.682981	0.95489	0.448548	0.453577	0.500527	0.33324	1.59583	0.458244	0.511701	0.33324	0.88281	0.866829	0.899528	0.870916	0.969328	0.888999	0.411327	0.6649	0.634089	0.474845	0.482205	0.555345	0.694174	0.359522	0.388617	0.546849	0.628982	0.927533	0.591323	0.815632	0.976096	0.809872
			IQR	19.4431	21.7781	1.60731	123.295	0.0559403	260.504	112.734	0.727284	108.881	1.97028	0.508439	10.668	6.56146	122.582	39.2299	12.5528	1010.03	260.513	549.087	61.2651	0.0477688	220.826	401.369	61.2651	4.13388	1.4994	2.63294	1.77543	0.237409	1.24265	858.522	8.74367	14.1716	5.64169	80.1273	129.202	20.7696	93.898	137.932	121.826	1070.28	112.734	1.1472	11.4604	65.8157	3.74571
			Kurtosis	1.05924	2.39649	0.506635	-0.804394	-0.304267	-1.11029	-0.791942	1.90873	-0.815453	-1.50704	1.50348	3.13295	-1.0168	-1.38597	0.423111	-0.880004	-1.03781	-1.11052	-1.13721	-1.65871	1.74553	-0.966671	-1.06948	-1.65871	-0.220481	-0.514933	-0.0445916	-0.642227	-0.48185	-0.191427	-0.913359	-1.7301	-0.466585	-1.4328	-1.26694	-1.34764	-0.328453	-1.47966	-0.8595	-1.32453	-0.583801	-0.791942	-1.33765	-0.978345	-0.454804	-1.01786
			Skewness	1.49746	1.91438	1.45076	0.670068	0.959777	-0.244	0.673921	1.75757	0.665713	0.338598	1.63973	2.14108	0.618652	0.495654	1.0949	0.761831	-0.092403	-0.243638	0.126884	0.0916792	1.74043	-0.330057	0.118238	0.0916792	0.858267	0.773821	0.921544	0.780975	0.98845	0.924012	-0.322016	0.376139	0.895266	0.191971	0.328417	0.512343	0.833373	-0.220025	0.227104	0.52715	0.778687	0.673921	0.2317	0.532224	0.843436	0.576357
			Shapiro test (W)	0.747295	0.615388	0.645921	0.891099	0.88572	0.980724	0.889369	0.659499	0.888786	0.931776	0.690473	0.500285	0.910173	0.898659	0.873562	0.867435	0.979856	0.980716	0.988378	0.939573	0.647051	0.980985	0.989374	0.939573	0.889735	0.901026	0.871177	0.902316	0.837446	0.891675	0.951727	0.861045	0.874743	0.930918	0.956772	0.90283	0.91107	0.952093	0.986289	0.894828	0.90793	0.889369	0.963221	0.916932	0.873787	0.936906
			Shapiro test (p)	0.00330804	8.44198e-05	0.000196037	0.174475	0.151684	0.968922	0.166822	0.000285539	0.164316	0.465589	0.000675425	3.66483e-06	0.282182	0.21178	0.10997	0.0933048	0.964391	0.968883	0.994424	0.548274	0.000202266	0.970221	0.995996	0.548274	0.168414	0.224845	0.103172	0.232259	0.0411204	0.177091	0.68896	0.0785041	0.113491	0.456985	0.748537	0.235275	0.288423	0.693298	0.989932	0.192061	0.267075	0.166822	0.821878	0.332074	0.110633	0.519127
			Box-Cox Transformation (lambda)	0.1	-0.1	0	0.4	0.4	1.3	0.4	0	0.4	0.6	0.2	-0.1	0.2	-0.2	0.2	0.3	1.1	1.3	0.9	0.5	0.2	1.4	0.9	0.5	0.4	0.4	0.3	0.4	0.3	0.4	1.4	-0.1	-0.2	0.5	0.5	-0.2	0.3	1.6	0.7	-0.3	0.1	0.4	0.7	0.5	0.3	0.5
		COMPARISON	ANALYSIS	AC	BAs_total	Cer	Cer_PC	ChoE	ChoE_LPC	Chol_PC	DAG	DAPC	DAPE	FAA	FBA	FFA.16.1	FFA.18.1	FFA.18.2	GCBA	Lipids	LPC	LPE	LPI	MAG	MAPC_total	MAPE_total	MAPI	MEMAPC	MEMAPC.O_plasmanyles	MEMAPC.P_plasmenyles	MEMAPE	MEMAPE.O_plasmanyles	MEMAPE.P_plasmenyles	Membrane.Lipids	MEPC.O_plasmanyles	MEPC.P_plasmenyles	MEPE.O_plasmanyles	MEPE.P_plasmenyles	MUFA	NAE	NEFA_omega_3	NEFA_omega_6	NEFA_omega_9	NEFA_total	PC	PC.DHA	PC_20.4	PC_PEMT	PE
			Class	Acylcarnitines	Bile Acids	Sphingolipids	Ceramides and PC	Sterols	ChoE and LPC	Cho01 and PC	Glycerolipids	Glycerophospholipids	Glycerophospholipids	Fatty amides	Bile Acids	Non-esterified fatty acids	Non-esterified fatty acids	Non-esterified fatty acids	Bile Acids	All the lipids	Glycerophospholipids	Glycerophospholipids	Glycerophospholipids	Glycerolipids	Glycerophospholipids	Glycerophospholipids	Glycerophospholipids	Glycerophospholipids	Glycerophospholipids	Glycerophospholipids	Glycerophospholipids	Glycerophospholipids	Glycerophospholipids	Glycerophospholipids + Diacylglycerols	Glycerophospholipids	Glycerophospholipids	Glycerophospholipids	Glycerophospholipids	Non-esterified fatty acids	Fatty amides	Non-esterified fatty acids	Non-esterified fatty acids	Non-esterified fatty acids	Non-esterified fatty acids	Glycerophospholipids	Glycerophospholipids	Glycerophospholipids	Glycerophospholipids	Glycerophospholipids
			Common name or function			Hepatic fatty acid uptake is regulated by the sphingolipid acyl chain length. Biochim Biophys Acta. 2014 Dec;1841(12):1754-66.	Cer and PC		ChoE and LPC	UC and PC	Promote curvature elastic stress in membranes. Proc Natl Acad Sci U S A. 2000 Aug 1;97(16):9032-6.					FFA with 16:1 FA chains	FFA with 18:1 FA chains	FFA with 18:2 FA chains																												PC with 22:6 FA	PC with 20:4 FA(arachidonic acid)	Glycerophospholipids potentially derived from PE methylation
			Individual notation	Acylcarnitines	Bile Acids	Ceramides		Cholesteryl Esters			Diacylglycerols	Diacylglycerophosphocholine	Diacylglycerophosphoethanolamine	Primary fatty amides	Free bile acids				Glycine-conjugated bile acids	PC+PE+LPC+LPE+PI+LPI+PS+PG+LPG+DAG+TAG+NEFA+SL	Lysophosphatidylcholines	Lysophosphatidylethanolamines	Lysophosphatidylinositols	Total Monoacylglycerols	Monoacylglycerophosphocholine	Monoacylglycerophosphoethanolamine	Monoacylglycerophosphoinositol	1-ether, 2-acylglycerophosphocholines	1-ether, 2-acylglycerophosphocholines O_plasmanyles	1-ether, 2-acylglycerophosphocholines P_plasmenyles	1-ether, 2-acylglycerophosphoethanolamine	1-ether, 2-acylglycerophosphoethanolamine O_plasmanyles	1-ether, 2-acylglycerophosphoethanolamine P_plasmenyles	PC+PE+LPC+LPE+PI+LPI+PS+PG+LPG(+DAG)	1-Monoetherglycerophosphocholine O_plasmanyles	1-Monoetherglycerophosphocholine P_plasmenyles	1-Monoetherglycerophosphoethanolamine O_plasmanyles	1-Monoetherglycerophosphoethanolamine P_plasmenyles	Monounsaturated fatty acids	N-Acyl ethanolamines	NEFA omega 3	NEFA omega 6	NEFA omega 9	Non-esterified fatty acids	Phosphatidylcholines	PC-DHA	PC 20:4	PE PEMT	Phosphatidylethanolamines
			Individual composition or probable ID
		PD Vs. Control	Diff mean	-7.99201	5.87561	11.3897	108.282	0.308875	120.682	96.8921	3.40453	92.143	0.817807	3.56462	-9.43966	10.1994	54.2074	25.3222	15.3153	391.693	120.373	-36.7544	-22.9437	0.492238	121.941	-26.1665	-22.9437	4.74905	1.85707	2.89199	1.49969	0.280024	1.107	205.753	-1.40427	-0.16349	-0.137407	-10.4505	65.7122	19.3241	34.317	124.961	53.8094	678.512	96.8921	1.06231	12.1475	63.4197	2.3175
			Effect size (Glass's Delta)	-0.258272	0.100091	2.37161	1.17972	5.14562	0.610875	1.09101	3.23563	1.07808	0.693035	5.04553	-0.16392	1.68926	0.548897	0.63347	1.31471	0.500523	0.609369	-0.0863018	-0.647464	3.54172	0.652172	-0.0734181	-0.647464	1.4028	1.36742	1.41749	0.879683	0.778579	0.887235	0.33109	-0.247389	-0.0136099	-0.0338778	-0.148626	0.625698	0.897248	0.554145	0.965619	0.543318	0.745229	1.09101	1.02786	1.36156	1.09974	0.813202
			F test to compare two variances (F)	0.110402	1.55766	35.2087	2.12538	142.022	5.39669	2.1851	28.9892	2.17847	2.7262	70.8166	0.347834	5.74362	0.776166	6.29857	22.3175	0.810648	5.39494	0.333785	1.31472	36.688	5.92442	0.383752	1.31472	3.02099	3.26945	2.99366	2.90361	3.64599	2.49698	0.951731	0.308673	0.387317	1.01472	0.369651	0.846173	1.663	2.12449	2.54686	0.822136	0.513975	2.1851	2.78994	2.33715	2.33068	2.8774
			F test to compare two variances (p)	6.5727e-05	0.503282	6.50493e-06	0.246806	1.3721e-08	0.0135161	0.229949	1.51011e-05	0.23175	0.125709	3.02549e-07	0.0503799	0.0107866	0.610481	0.00768228	4.63893e-05	0.665012	0.0135319	0.0421698	0.694836	5.43833e-06	0.00963082	0.0754659	0.694836	0.0929062	0.072967	0.0954774	0.104571	0.0524912	0.161055	0.877679	0.0296879	0.0782769	0.965055	0.0649134	0.720385	0.438727	0.247069	0.152452	0.683023	0.212577	0.229949	0.117575	0.192761	0.194192	0.107411
			Student's t-test (t)	-0.795077	0.22012	1.73875	2.29366	1.91751	1.0045	2.09722	2.59937	2.07495	1.21435	2.64427	-0.566865	2.71481	1.53893	0.983421	1.1923	1.38434	1.00214	-0.252641	-1.51754	2.54649	1.03608	-0.248518	-1.51754	2.35206	2.21534	2.38605	1.50037	1.1987	1.6135	0.869226	-0.728137	-0.0459736	-0.0870386	-0.507283	1.70709	1.92397	1.07757	1.74149	1.49602	2.35041	2.09722	1.78337	2.54551	2.05839	1.39239
			Student's t-test (p)	0.445017	0.827375	0.096667	0.0295226	0.0699164	0.323843	0.0451277	0.0165504	0.0472958	0.234756	0.0155365	0.575322	0.0113199	0.135048	0.33407	0.245745	0.17719	0.32496	0.804788	0.140342	0.0187881	0.309223	0.805547	0.140342	0.0259333	0.0350418	0.0240321	0.144711	0.241059	0.117852	0.392114	0.480661	0.963658	0.93126	0.615929	0.0988723	0.0645777	0.290421	0.0925768	0.145835	0.0260293	0.0451277	0.0853702	0.0167035	0.048967	0.174763
			Student's t-test (power)	0.0987379	0.0571723	0.99996	0.836486	1	0.331424	0.776156	1	0.766413	0.408407	1	0.0693656	0.987704	0.277652	0.352039	0.905923	0.238991	0.330067	0.0553265	0.365039	1	0.369449	0.0538515	0.365039	0.937639	0.926082	0.942003	0.59215	0.484839	0.599435	0.13104	0.0946399	0.0501321	0.0508186	0.0658912	0.344894	0.609041	0.282031	0.67259	0.273035	0.459488	0.776156	0.726433	0.92402	0.7826	0.526919
			Wilcoxon signed-rank test (W)	103	96	152	152	163	108	148	166	148	122	163	107	153	135	120	96	131	107	97	64	166	111	98	64	159	156	159	134	124	138	114	98	110	94	93	140	140	116	138	135	148	148	140	155	147	130
			Wilcoxon signed-rank test (p)	0.913961	0.879765	0.0215566	0.0215566	0.00451489	0.745709	0.0349888	0.00275334	0.0349888	0.350371	0.00451489	0.778694	0.0189741	0.130729	0.397431	0.879765	0.182884	0.778694	0.913961	0.119629	0.00275334	0.649616	0.948316	0.119629	0.00831925	0.0127294	0.00831925	0.142583	0.194569	0.0995765	0.558848	0.948316	0.681119	0.812072	0.778694	0.0822094	0.0822094	0.501847	0.0995765	0.130729	0.0349888	0.0349888	0.0822094	0.0145815	0.0392466	0.197971
			fold change	0.685505	1.15418	4.97169	2.09802	5.69206	1.27706	2.01195	5.89078	2.0025	1.52377	8.63816	0.63568	2.12872	1.30239	1.43265	2.2554	1.22451	1.2764	0.956804	0.784239	6.65198	1.29885	0.962432	0.784239	2.2384	2.18531	2.27508	1.76613	1.7547	1.78875	1.13619	0.835511	0.99137	0.983913	0.928332	1.34748	1.62285	1.19923	1.37526	1.29711	1.46874	2.01195	1.6078	2.11053	2.07345	1.65859
			log2(fold change)	-0.544762	0.206863	2.31374	1.06903	2.50895	0.35283	1.00859	2.55846	1.0018	0.607643	3.11072	-0.653628	1.08999	0.381167	0.518684	1.17338	0.292203	0.352076	-0.0637052	-0.350634	2.73378	0.377239	-0.0552436	-0.350634	1.16247	1.12784	1.18592	0.820592	0.811223	0.838952	0.1842	-0.259268	-0.0125043	-0.0233969	-0.107287	0.430262	0.698526	0.262105	0.4597	0.375304	0.554575	1.00859	0.685087	1.07761	1.05203	0.729957
			robust fold change	1.19644	0.898295	6.12041	2.47458	2.74631	1.08929	2.29291	8.72082	2.25888	2.02651	9.57616	1.39913	1.77541	1.47934	1.17209	0.84093	1.15274	1.0894	0.97458	0.718196	6.81968	1.10522	0.973661	0.718196	2.23418	1.9025	2.27464	1.91676	1.87949	1.96241	1.12835	1.32178	1.45916	0.939933	0.977861	1.4735	1.93577	1.01432	1.38096	1.49654	1.70588	2.29291	1.77304	2.26951	2.20442	2.00983
			log2(robust fold change)	0.258749	-0.15474	2.61363	1.30719	1.45749	0.12339	1.19718	3.12446	1.17561	1.019	3.25945	0.484525	0.828156	0.564951	0.229079	-0.249942	0.205063	0.123537	-0.0371473	-0.47755	2.7697	0.144328	-0.0385085	-0.47755	1.15974	0.927894	1.18564	0.938672	0.910338	0.972627	0.174211	0.40248	0.545136	-0.0893695	-0.0322987	0.559249	0.952906	0.0205087	0.465674	0.581632	0.770514	1.19718	0.826222	1.18238	1.1404	1.00708
			fold change - bootsrap resampling method	0.816996	1.6066	8.13779	2.38696	6.48133	1.30113	2.24272	8.06244	2.26068	1.60174	11.6185	1.42739	2.25056	1.34855	1.50611	2.49368	1.25218	1.3201	0.980955	0.793083	10.3637	1.33534	0.993387	0.792698	2.42683	2.44913	2.51917	1.94057	2.02809	1.99253	1.15613	0.885975	1.03062	1.01511	0.942431	1.40676	1.69917	1.22503	1.38905	1.34335	1.53763	2.25394	1.6761	2.30697	2.33837	1.81091
			log2(fold change) - bootstrap resampling method	-0.291599	0.684011	3.02464	1.25517	2.69629	0.379762	1.16525	3.01122	1.17675	0.679643	3.53835	0.513384	1.17028	0.431414	0.590832	1.31827	0.32444	0.400648	-0.027741	-0.334456	3.37347	0.417211	-0.00957261	-0.335157	1.27908	1.29227	1.33295	0.956479	1.02012	0.994602	0.209299	-0.174662	0.0435118	0.0216426	-0.0855411	0.492374	0.764834	0.292823	0.474103	0.425837	0.62071	1.17245	0.745108	1.206	1.2255	0.856717
			95% lower confidence interval	-1.59436	-1.60629	0.118407	0.218576	0.739836	-0.279964	0.115817	0.951957	0.0991181	-0.244092	1.40206	-3.12416	0.331021	-0.140166	-0.411862	-0.90097	-0.158002	-0.291416	-0.562846	-0.827519	1.01231	-0.295562	-0.565262	-0.852359	0.218844	0.236934	0.29966	-0.115209	-0.392213	-0.122338	-0.226325	-0.860128	-0.639661	-0.546079	-0.583248	-0.149911	-0.068397	-0.173972	-0.0289084	-0.131453	-0.0128665	0.0994514	0.0118196	0.242366	0.114077	-0.221658
			95% upper confidence interval	0.939218	2.2658	5.17349	2.35483	3.98648	1.08017	2.18934	4.59121	2.19281	1.58368	5.22147	2.86421	2.01503	0.991435	1.56694	2.614	0.871299	1.08797	0.528234	0.110229	5.1648	1.14415	0.572208	0.128688	2.24424	2.32162	2.32231	1.95688	2.24646	2.06933	0.716951	0.554122	0.692406	0.56191	0.423703	1.06692	1.55736	0.766025	0.94914	1.01056	1.31983	2.23664	1.49278	2.07733	2.41924	1.85938
		ROC Analysis	AUC	0.515	0.52	0.76	0.76	0.815	0.54	0.74	0.83	0.74	0.61	0.815	0.535	0.765	0.675	0.6	0.52	0.655	0.535	0.515	0.68	0.83	0.555	0.51	0.68	0.795	0.78	0.795	0.67	0.652632	0.69	0.57	0.51	0.55	0.53	0.535	0.7	0.7	0.58	0.69	0.675	0.74	0.74	0.7	0.775	0.735	0.65
			AUC (se)	0.113223	0.113053	0.0883752	0.0883752	0.0776962	0.112234	0.0917376	0.0743841	0.0917376	0.107642	0.0776962	0.112459	0.087493	0.10093	0.108463	0.113053	0.103252	0.112459	0.113223	0.100314	0.0743841	0.111477	0.11338	0.100314	0.0818352	0.0847437	0.0818352	0.101533	0.104742	0.0990359	0.110596	0.11338	0.111743	0.112671	0.112459	0.0976986	0.0976986	0.10994	0.0990359	0.10093	0.0917376	0.0917376	0.0976986	0.0856775	0.0925376	0.103796
			AUC(p)	0.473593	0.464758	0.0706454	0.0706454	0.0213248	0.429284	0.0954233	0.01327	0.0954233	0.304692	0.0213248	0.43817	0.0649614	0.192989	0.322405	0.464758	0.22645	0.43817	0.473593	0.18481	0.01327	0.402575	0.482412	0.18481	0.035741	0.0492633	0.035741	0.201249	0.233122	0.168717	0.375824	0.482412	0.411485	0.447045	0.43817	0.153023	0.153023	0.357991	0.168717	0.192989	0.0954233	0.0954233	0.153023	0.0542629	0.102086	0.234973
			Sensitivity	0.7	0.8	0.7	0.6	0.9	0.65	0.55	0.7	0.55	0.55	0.65	0.75	0.7	0.75	0.6	0.6	0.7	0.65	0.3	0.9	0.85	0.65	0.3	0.9	0.7	0.8	0.7	0.65	0.578947	0.65	0.75	0.4	0.75	0.5	0.2	0.9	0.6	0.25	0.55	0.9	0.85	0.55	0.8	0.65	0.65	0.55
			Specificity	0.5	0.35	0.8	0.9	0.7	0.6	0.9	0.9	0.9	0.7	0.9	0.5	0.8	0.6	0.7	0.65	0.7	0.6	0.95	0.45	0.8	0.6	0.95	0.45	0.9	0.8	0.9	0.8	0.8	0.8	0.5	0.95	0.6	0.8	1	0.5	0.8	1	0.9	0.5	0.7	0.9	0.6	0.9	0.8	0.8
			Positive predictive value	0.736842	0.380952	0.875	0.923077	0.857143	0.764706	0.916667	0.933333	0.916667	0.785714	0.928571	0.75	0.875	0.789474	0.8	0.461538	0.823529	0.764706	0.75	0.45	0.894737	0.764706	0.75	0.45	0.933333	0.888889	0.933333	0.866667	0.846154	0.866667	0.75	0.8	0.789474	0.555556	1	0.782609	0.857143	1	0.916667	0.782609	0.85	0.916667	0.8	0.928571	0.866667	0.846154
			Negative predictive value	0.454545	0.777778	0.571429	0.529412	0.777778	0.461538	0.5	0.6	0.5	0.4375	0.5625	0.5	0.571429	0.545455	0.466667	0.764706	0.538462	0.461538	0.730769	0.9	0.727273	0.461538	0.730769	0.9	0.6	0.666667	0.6	0.533333	0.5	0.533333	0.5	0.76	0.545455	0.761905	0.714286	0.714286	0.5	0.4	0.5	0.714286	0.7	0.5	0.6	0.5625	0.533333	0.470588
			Precision	0.736842	0.380952	0.875	0.923077	0.857143	0.764706	0.916667	0.933333	0.916667	0.785714	0.928571	0.75	0.875	0.789474	0.8	0.461538	0.823529	0.764706	0.75	0.45	0.894737	0.764706	0.75	0.45	0.933333	0.888889	0.933333	0.866667	0.846154	0.866667	0.75	0.8	0.789474	0.555556	1	0.782609	0.857143	1	0.916667	0.782609	0.85	0.916667	0.8	0.928571	0.866667	0.846154
			Recall	0.7	0.8	0.7	0.6	0.9	0.65	0.55	0.7	0.55	0.55	0.65	0.75	0.7	0.75	0.6	0.6	0.7	0.65	0.3	0.9	0.85	0.65	0.3	0.9	0.7	0.8	0.7	0.65	0.578947	0.65	0.75	0.4	0.75	0.5	0.2	0.9	0.6	0.25	0.55	0.9	0.85	0.55	0.8	0.65	0.65	0.55
			Youden Index	0.2	0.15	0.5	0.5	0.6	0.25	0.45	0.6	0.45	0.25	0.55	0.25	0.5	0.35	0.3	0.25	0.4	0.25	0.25	0.35	0.65	0.25	0.25	0.35	0.6	0.6	0.6	0.45	0.378947	0.45	0.25	0.35	0.35	0.3	0.2	0.4	0.4	0.25	0.45	0.4	0.55	0.45	0.4	0.55	0.45	0.35
			Cutoff	13.3283	11.5227	2.44682	193.394	0.0728562	458.18	189.13	1.67471	176.349	2.46257	1.53936	2.58016	11.9941	195.505	60.6789	9.96447	1881.44	458.138	1198.91	69.5565	0.0627821	426.78	937.662	69.5565	7.0937	2.06608	4.05316	2.55294	0.404571	1.90564	1381.39	13.0845	15.6609	10.76	245.595	130.059	40.1738	261.098	447.04	115.409	1556.18	189.13	1.73043	18.992	97.2644	5.95979
[truncated: 55 more columns]

## Sheet: Raw data per metabolite_2
SQRT TRASFORMED DATA
	SAMPLE.ID	Group	AC02	AC04	AC11	BA03	BA05	BA06_BA07	BA15	BA16H	BA18	Cer_02	Cer_03	Cer_04	Cer_05	Cer_06	Cer_07	Cer_09	Cer_10_Cer_11	Cer_12	Cer_13	Cer_16	ChoE_07	ChoE_08	ChoE_12	ChoE_17	DAPC03	DAPC04	DAPC05	DAPC06	DAPC07	DAPC08	DAPC09	DAPC11	DAPC12	DAPC13	DAPC14	DAPC15	DAPC18	DAPC19	DAPC20	DAPC23	DAPC24	DAPC26	DAPC28	DAPC29	DAPC30	DAPC32	DAPC34
CLASS			Fatty esters	Fatty esters	Fatty esters	Bile acids	Bile acids	Bile acids	Bile acids	Bile acids	Bile acids	Sphingolipids	Sphingolipids	Sphingolipids	Sphingolipids	Sphingolipids	Sphingolipids	Sphingolipids	Sphingolipids	Sphingolipids	Sphingolipids	Sphingolipids	Sterols	Sterols	Sterols	Sterols	Glycerophospholipids	Glycerophospholipids	Glycerophospholipids	Glycerophospholipids	Glycerophospholipids	Glycerophospholipids	Glycerophospholipids	Glycerophospholipids	Glycerophospholipids	Glycerophospholipids	Glycerophospholipids	Glycerophospholipids	Glycerophospholipids	Glycerophospholipids	Glycerophospholipids	Glycerophospholipids	Glycerophospholipids	Glycerophospholipids	Glycerophospholipids	Glycerophospholipids	Glycerophospholipids	Glycerophospholipids	Glycerophospholipids
SUBCLASS A			Acylcarnitines	Acylcarnitines	Acylcarnitines	Primary bile acids	Primary bile acids		Glycine-conjugated bile acids	Glycine-conjugated bile acids	Glycine-conjugated bile acids	Ceramides	Ceramides	Ceramides	Ceramides	Ceramides	Ceramides	Ceramides	Ceramides	Ceramides	Ceramides	Ceramides	Cholesteryl Ester	Cholesteryl Ester	Cholesteryl Ester	Cholesteryl Ester	Diacylglycerophosphocholine	Diacylglycerophosphocholine	Diacylglycerophosphocholine	Diacylglycerophosphocholine	Diacylglycerophosphocholine	Diacylglycerophosphocholine	Diacylglycerophosphocholine	Diacylglycerophosphocholine	Diacylglycerophosphocholine	Diacylglycerophosphocholine	Diacylglycerophosphocholine	Diacylglycerophosphocholine	Diacylglycerophosphocholine	Diacylglycerophosphocholine	Diacylglycerophosphocholine	Diacylglycerophosphocholine	Diacylglycerophosphocholine	Diacylglycerophosphocholine	Diacylglycerophosphocholine	Diacylglycerophosphocholine	Diacylglycerophosphocholine	Diacylglycerophosphocholine	Diacylglycerophosphocholine
SUBCLASS B												CER[NS]	CER[NS]	CER[NS]	CER[NS]	CER[NS]	CER[NS]	CER[NS]	CER[NS]	CER[NS]	CER[NS]	CER[NS]
SUBCLASS C												Sphingoid base d18:1	Sphingoid base d18:1	Sphingoid base d18:1	Sphingoid base d18:1	Mixed sphingoid base	Sphingoid base d18:1	Sphingoid base d18:1	Mixed sphingoid base	Mixed sphingoid base	Sphingoid base d18:1	Sphingoid base d18:1
COMMON NAME OR FUNCTION			L-Octanoylcarnitine	Decanoylcarnitine	Oleoylcarnitine	CA (31% bile)	CDCA (45% bile)	UDCA + HDCA	GCA	GCDCA	GDCA
INDIVIDUAL NOTATION			AC(8:0)	AC(10:0)	AC(18:1n-9)	Cholic acid	Chenodeoxycholic acid	Ursodeoxycholic + Hyodeoxycholic acid	Glycocholic acid	Glycochenodeoxycholic acid	Glycodeoxycholic acid	Cer(d18:1/16:0)	Cer(d18:1/20:0)	Cer(d18:1/21:0)	Cer(d18:1/22:0)	Cer(40:2)	Cer(d18:1/23:0)	Cer(d18:1/24:0)	Cer(d18:1/24:1)+Cer(d18:2/24:0)	Cer(42:3)	Cer(d18:1/18:0)	Cer(d18:1/19:0)	ChoE(18:1)	ChoE(18:2)	ChoE(20:4)	ChoE(22:6)	PC(16:0/16:0)	PC(32:1)	PC(14:0/18:2)	PC(16:0/18:0)	PC(16:0/18:1)	PC(16:0/18:2)	PC(14:0/20:4)	PC(18:0/18:1)	PC(18:0/18:2)	PC(18:2/18:2)	PC(16:0/20:4)	PC(16:0/20:5)	PC(18:0/20:3)	PC(18:0/20:4)	PC(38:5)	PC(18:2/20:4)	PC(16:0/22:6)	PC(18:0/22:4)	PC(40:5)	PC(18:0/22:5)	PC(18:0/22:6)	PC(18:1/22:6)	PC(40:8)
INDIVIDUAL COMPOSITION OR PROBABLE ID																												PC(16:0/16:1) + PC(14:1/18:0) + PC(14:0/18:1)													PC(18:1/20:4) + PC(16:0/22:5)								PC(20:4/20:4) + PC(18:2/22:6) + PC(18:0/22:8)
SIMPLIFIED NAME			AC	AC	AC	BA	BA	BA	BA	BA	BA	Cer	Cer	Cer	Cer	Cer	Cer	Cer	Cer	Cer	Cer	Cer	ChoE	ChoE	ChoE	ChoE	PC_DAPC	PC_DAPC	PC_DAPC	PC_DAPC	PC_DAPC	PC_DAPC	PC_DAPC	PC_DAPC	PC_DAPC	PC_DAPC	PC_DAPC	PC_DAPC	PC_DAPC	PC_DAPC	PC_DAPC	PC_DAPC	PC_DAPC	PC_DAPC	PC_DAPC	PC_DAPC	PC_DAPC	PC_DAPC	PC_DAPC
SIMPLE NAME			AC	AC	AC	BA	BA	BA	BA	BA	BA	Cer	Cer	Cer	Cer	Cer	Cer	Cer	Cer	Cer	Cer	Cer	ChoE	ChoE	ChoE	ChoE	PC	PC	PC	PC	PC	PC	PC	PC	PC	PC	PC	PC	PC	PC	PC	PC	PC	PC	PC	PC	PC	PC	PC
HMDB			HMDB00791	HMDB00651	HMDB05065	HMDB00619	HMDB00518	HMDB00946	HMDB00138	HMDB00637	HMDB00631	HMDB04949	HMDB04951		HMDB04952		HMDB00950	HMDB04956			HMDB04950		HMDB00918	HMDB00610	HMDB06726	HMDB06733	HMDB00564		HMDB07874	HMDB07970	HMDB07972	HMDB07973	HMDB07883	HMDB08038	HMDB08039	HMDB08138	HMDB07982	HMDB07984	HMDB08046	HMDB08048		HMDB08147	HMDB07991	HMDB08054		HMDB08056	HMDB08057	HMDB08123
KEGG			C02838			C00695	C02528	C07880	C01921	C05466	C05464	C00195	C00195		C00195			C00195			C00195		C14641	C15441	C02530	C02530	C00157		C00157	C00157	C00157	C00157	C00157	C00157	C00157	C00157	C00157	C00157	C00157	C00157		C00157	C00157	C00157		C00157	C00157	C00157
CHEMICAL FORMULA			C15H29NO4	C17H33NO4	C25H47NO4	C24H40O5	C24H40O4	C24H40O4	C26H43NO6	C26H43NO5	C26H43NO5	C34H67NO3	C38H75NO3		C40H79NO3		C41H81NO3	C42H83NO3			C36H71NO3		C45H78O2	C45H76O2	C47H76O2	C49H76O2	C40H80NO8P		C40H76NO8P	C42H84NO8P	C42H82NO8P	C42H80NO8P	C42H76NO8P	C44H86NO8P	C44H84NO8P	C44H80NO8P	C44H80NO8P	C44H78NO8P	C46H86NO8P	C46H84NO8P		C46H80NO8P	C46H80NO8P	C48H88NO8P		C48H86NO8P	C48H84NO8P	C48H82NO8P
COMMON NAME			L-Octanoylcarnitine	Decanoylcarnitine	Oleoylcarnitine	Cholic acid	Chenodeoxycholic acid	Ursodeoxycholic acid	Glycocholic acid	Chenodeoxycholic acid glycine conjugate	Deoxycholic acid glycine conjugate	Ceramide (d18:1/16:0)	Ceramide (d18:1/20:0)		Ceramide (d18:1/22:0)		Cer(d18:1/23:0)	Ceramide (d18:1/24:0)			Ceramide (d18:1/18:0)		CE(18:1(9Z))	CE(18:2(9Z,12Z))	CE(20:4(5Z,8Z,11Z,14Z)	CE(22:6(4Z,7Z,10Z,13Z,16Z,19Z))	PC(16:0/16:0)		PC(14:0/18:2(9Z,12Z))	PC(16:0/18:0)	PC(16:0/18:1(9Z))	PC(16:0/18:2(9Z,12Z))	PC(14:0/20:4(5Z,8Z,11Z,14Z))	PC(18:0/18:1(9Z))	PC(18:0/18:2(9Z,12Z))	PC(18:2(9Z,12Z)/18:2(9Z,12Z))	PC(16:0/20:4(5Z,8Z,11Z,14Z))	PC(16:0/20:5(5Z,8Z,11Z,14Z,17Z))	PC(18:0/20:3(5Z,8Z,11Z))	PC(18:0/20:4(5Z,8Z,11Z,14Z))		PC(18:2(9Z,12Z)/20:4(5Z,8Z,11Z,14Z))	PC(16:0/22:6(4Z,7Z,10Z,13Z,16Z,19Z))	PC(18:0/22:4(7Z,10Z,13Z,16Z))		PC(18:0/22:5(7Z,10Z,13Z,16Z,19Z))	PC(18:0/22:6(4Z,7Z,10Z,13Z,16Z,19Z))	PC(18:1(9Z)/22:6(4Z,7Z,10Z,13Z,16Z,19Z))
BIOFUNCTION			Cell signaling	Cell signaling	Cell signaling	Cell signaling	Cell signaling	Cell signaling	Cell signaling	Cell signaling	Cell signaling	Cell signaling	Cell signaling		Cell signaling		Cell signaling	Cell signaling			Cell signaling		Cell signaling	Cell signaling	Cell signaling	Cell signaling	Cell signaling		Cell signaling	Cell signaling	Cell signaling	Cell signaling	Cell signaling	Cell signaling	Cell signaling	Cell signaling	Cell signaling	Cell signaling	Cell signaling	Cell signaling		Cell signaling	Cell signaling	Cell signaling		Cell signaling	Cell signaling	Cell signaling
CLASS (HMDB)			Fatty Acid Esters	Fatty Acid Esters	Fatty Acid Esters	Steroids and Steroid Derivatives	Steroids and Steroid Derivatives	Steroids and Steroid Derivatives	Steroids and Steroid Derivatives	Steroids and Steroid Derivatives	Steroids and Steroid Derivatives	Sphingolipids	Sphingolipids		Sphingolipids		Sphingolipids	Sphingolipids			Sphingolipids		Steroids and Steroid Derivatives	Steroids and Steroid Derivatives	Steroids and Steroid Derivatives	Steroids and Steroid Derivatives	Glycerophospholipids		Glycerophospholipids	Glycerophospholipids	Glycerophospholipids	Glycerophospholipids	Glycerophospholipids	Glycerophospholipids	Glycerophospholipids	Glycerophospholipids	Glycerophospholipids	Glycerophospholipids	Glycerophospholipids	Glycerophospholipids		Glycerophospholipids	Glycerophospholipids	Glycerophospholipids		Glycerophospholipids	Glycerophospholipids	Glycerophospholipids
SUPER CLASS (HMDB)			Lipids	Lipids	Lipids	Lipids	Lipids	Lipids	Lipids	Lipids	Lipids	Lipids	Lipids		Lipids		Lipids	Lipids			Lipids		Lipids	Lipids	Lipids	Lipids	Lipids		Lipids	Lipids	Lipids	Lipids	Lipids	Lipids	Lipids	Lipids	Lipids	Lipids	Lipids	Lipids		Lipids	Lipids	Lipids		Lipids	Lipids	Lipids
	PD354	PD	0.258728		0.486066	1.14251	0.926505	0.645297	1.12908	0.43248	0.678754	4.76329	2.71544	1.05264	4.01277	2.60073	1.65625	2.82304	4.02372	1.61961	2.98713	0.650247	0.283203	0.321295	0.225716	0.343548	6.21411	1.91224		1.99901	8.45995	2.78189		3.98391	2.81572	0.827722	2.45052	0.820433	0.987203	2.43341	0.975413	0.60643	0.975242	0.622006		0.521624	0.761871	0.442849
	PD423	PD	2.35271	2.10372	2.86326	2.30093	2.0611	1.18374	0.925183	0.94216	0.712206	0.66673	0.372092	0.14214	0.482949	0.338337	0.221676	0.370502	0.613832	0.329931	0.48246	0.284446	0.483535	0.674368	0.378506	0.426641	5.96219	3.26212	0.585574	1.77531	14.7641	4.29297	0.246289	4.67134	4.03991	0.728444	3.37592	0.851565	1.41424	3.90162	1.38757	0.652344	1.69043	0.716948	0.46836	0.671	1.43656	0.683338	0.267247
	PD436	PD	1.61252	1.3126	1.51964	0.310599	0.656588		0.749833	0.591363	0.342892	1.29769	1.05004	0.360069	1.46297	0.853102	0.521993	0.758261	0.938723	0.393552	0.992758	0.228821	0.0883332	0.0895569	0.0602783	0.14965	4.69432	2.11792	0.420647	2.17457	9.56293	1.95067	0.190463	4.92042	3.06538	0.284413	2.4149	0.545759	0.617791	2.63751	1.15918	0.609489	1.26412	0.901667	0.321199	0.343931	1.23354	0.649501	0.256099
	PD520	PD	1.22661	1.13693	2.10913	0.313555	0.53937	0.485093	1.36882	0.758015	0.753751	0.754726	0.402074	0.164924	0.547906	0.452783	0.245668	0.441219	0.733555	0.406184	0.545856	0.10683	0.105358	0.198871	0.112747	0.097438	4.67815	2.22463	0.402183	1.42396	7.64864	3.07798	0.26667	3.24419	3.02238	0.56779	3.93712	1.06128	0.885356	3.28347	1.74324	0.671973	1.18333	0.622033	0.356629	0.529332	1.23642	0.530408	0.298218
	PD530	PD	2.16626	1.53374	2.63142	2.08828	1.94315	3.13363	1.88965	1.71037	1.65116	1.09349	0.7919	0.30131	1.03936	0.70287	0.398946	0.594756	0.915122	0.411826	0.629396	0.24461	0.38822	0.542264	0.443052	0.387666	5.1016	2.11653	0.364007	1.41275	11.8843	2.78757	0.241999	4.27868	2.71497	0.501233	3.5472	0.876374	1.04696	3.74191	1.352	0.631101	1.49398	0.728335	0.338258	0.572364	1.31707	0.524062	0.213671
	PD357	PD	0.483377		0.58452	0.417299	0.425148		0.469498	0.670577	0.485652	5.0009	2.58678	1.31831	3.75499	2.20506	1.55224	2.69471	4.08792	1.9091	4.11129	0.730645	0.744326	1.23647	0.671954	0.8288	3.61379	1.18755	0.497449	1.13565	3.59516	2.39081		1.97108	3.05853	5.31337	0.95904	0.209926	0.406216	0.718731	0.389889	0.626429	0.356903	0.223908	0.176971		0.296777		0.175567
	PD450	PD	3.29179	2.33682	4.02504	2.73292	2.91212	3.02404	3.81842	4.32985	6.63801	1.94816	1.55936	0.514762	1.84082	1.17579	0.635959	1.0685	1.57946	0.725275	1.24682	0.426324	0.178722	0.226217	0.13949	0.170675	8.02887	3.58845	0.688114	2.3597	17.4748	4.73979	0.413195	6.95828	5.45772	0.638342	4.29974	0.82038	1.23913	5.05159	2.19592	0.677821	1.88391	1.10595	0.533327	1.12795	1.6364	0.884375	0.378979
	PD495	PD	1.46765	2.10712	4.24309	1.27523	1.3688	0.950694	1.42778	1.50537	1.96117	1.11717	0.866089	0.344034	1.23026	0.693853	0.513026	0.748665	0.892032	0.37628	0.600992	0.212813	0.231066	0.257059	0.184743	0.185032	4.71176	1.90023	0.376081	1.29013	10.268	3.11539	0.285956	4.34298	3.62865	0.569008	3.33013	0.973904	0.858416	3.26509	1.60168	0.65495	1.2204	0.705676	0.368719	0.534335	1.17484	0.566475	0.352762
	PD501	PD	2.08144	1.76736	3.21273	0.570489	2.12863	1.25561	1.00718	1.60307	1.25561	0.318959	0.217886	0.0820539	0.298562	0.198855	0.108559	0.210624	0.289058	0.139305	0.254818	0.0755206	0.0943366	0.2077	0.175897	0.142361	2.28642	1.00181	0.188901	0.706339	4.43969	1.70393	0.110378	1.68181	1.48253	0.293546	1.63369	0.367357	0.377838	1.44828	0.633351	0.28875	0.633256	0.256355	0.14875	0.14453	0.528839	0.229984	0.123804
	PD537	PD	1.59724	1.47411	4.89037	3.56772	1.71364	1.12942	2.22697	1.42734	1.37439	0.470916	0.366329	0.124845	0.508372	0.293634	0.176345	0.273194	0.415958	0.183014	0.344038	0.0879642	0.108838	0.201704	0.186519	0.147878	2.52045	1.33988	0.223046	0.918044	4.59151	1.96966	0.112727	2.23859	1.95248	0.345554	2.04761	0.536829	0.678784	1.63175	1.03304	0.360757	0.86205	0.498966	0.227919	0.183624	0.898438	0.360874	0.150797
	PD550	PD	2.42413	2.73512	3.61496	0.569746	1.06459	0.491059	1.56654	1.59471	0.853805	0.766689	0.3465	0.147616	0.567023	0.359382	0.204125	0.545918	0.730128	0.34284	0.517782	0.0898183	0.11792	0.275544	0.164532	0.148005	3.23193	1.84544	0.408022	1.24375	5.90601	3.0094	0.220085	2.63564	3.0412	0.616457	3.06081	0.866966	0.95527	3.02085	1.38797	0.634072	0.96586	0.449212	0.2609	0.34297	1.04926	0.409191	0.239281
	PD562	PD	3.28613	2.1193	2.57168	0.770833	1.22408	1.00007	0.801349	0.996376	0.923322	0.502151	0.363998	0.125661	0.492055	0.341386	0.192269	0.309411	0.411056	0.212185	0.311034	0.119333	0.144254	0.144032	0.158103	0.132472	2.87872	1.26847	0.245564	0.857565	7.01622	1.53132	0.147378	2.39519	1.80222	0.175403	1.84926	0.241032	0.511579	2.17911	0.794961	0.252907	0.818829	0.441591	0.23359	0.436494	0.737701	0.341198	0.14157
	PD636	PD	1.56345	1.54362	4.72363	3.22839	9.09887	7.66803	2.64809	3.62523	8.26552	0.202537	0.126095	0.0496435	0.190526	0.11772	0.0761258	0.145512	0.222352	0.0999844	0.11755	0.0302712	0.0371987	0.0924968	0.0678143	0.0720573	1.21914	0.627447	0.115395	0.39405	2.21972	1.25838	0.0618569	0.923194	1.07821	0.214756	1.04994	0.335418	0.25138	0.805284	0.531708	0.196111	0.391975	0.195284	0.0947439	0.131699	0.357705	0.152463	0.0777801
	PD295	PD	2.03637	1.42072	3.48792	1.17904	1.6172	2.12323	1.45351	2.2681	2.28706	0.756419	0.481982	0.181355	0.706582	0.482801	0.276238	0.501819	0.712421	0.327076	0.58092	0.147382	0.218213	0.289206	0.198197	0.160687	5.08392	2.40502	0.459824	1.46114	9.92841	3.27322	0.243796	3.95515	3.73119	0.594062	3.47581	0.914207	0.94473	3.46123	1.51096	0.749611	1.12424	0.636072	0.376078	0.533549	1.03605	0.557816	0.290244
	PD340	PD	2.22232	1.7062	4.16258	2.26106	2.09913	1.15449	9.03131	10.2075	7.16884	0.897192	0.59622	0.170376	0.774081	0.46531	0.268619	0.485474	0.770476	0.331768	0.642946	0.147222	0.140282	0.172562	0.119624	0.102178	5.41502	2.2234	0.400139	1.56498	10.4345	3.70634	0.197358	3.72464	3.79775	0.615607	3.00129	0.573948	0.868191	3.19129	1.35068	0.654637	1.16424	0.604566	0.369693	0.481312	1.12594	0.515594	0.271944
	PD356	PD	0.548777		0.514114	1.28575	1.45193	1.1178	2.34574	1.42857	1.49165	1.72203	1.27566	0.424862	1.62951	0.79454	0.56107	0.808052	1.36471	0.596468	1.78636	0.291771	0.242021	0.421519	0.278652	0.205395	5.11734	2.0664	0.284555	1.44766	9.64022	3.95735	0.156054	3.68356	3.54957	0.511108	2.89649	0.938179	0.849831	3.04966	1.1979	0.546128	1.10273	0.639014	0.295081	0.582469	0.978946	0.432736	0.153824
	PD541	PD	1.65992	1.34203	2.71642	0.563206	1.61228	0.845604	2.12131	2.92191	1.31982	1.10655	0.749757	0.309622	1.06229	0.602001	0.426547	0.605615	0.875211	0.404933	0.917341	0.227987	0.217618	0.253298	0.221032	0.225693	5.34283	2.18943	0.401581	1.43246	11.2628	2.89859	0.237521	3.98628	3.06843	0.560737	3.58289	1.02569	1.12644	3.91083	1.51645	0.792864	1.48026	0.650906	0.358269	0.721415	1.25388	0.578295	0.253587
	PD546	PD	1.64945	1.54787	5.08649	0.858355	1.79854	1.52553	3.98527	3.38003	1.72749	0.308787	0.219842	0.0701328	0.262199	0.244004	0.101495	0.198521	0.331884	0.180444	0.318312	0.068776	0.114239	0.217759	0.166055	0.127763	3.19112	1.44711	0.234776	1.1774	5.80591	2.6766	0.122373	2.47517	2.43011	0.421257	2.44601	0.383746	0.603434	2.12313	1.05986	0.401946	0.925467	0.443036	0.27168	0.200352	0.944416	0.409826	0.166937
	PD579	PD	2.7191	2.03039	3.27034	5.06978	3.78963	3.18734	4.77292	2.24528	1.60206	1.47283	1.10711	0.449901	1.44345	1.19081	0.565887	0.774582	1.00605	0.522984	0.861833	0.316834	0.245809	0.149233	0.178221	0.192619	4.94778	2.03176	0.431538	1.34505	11.5296	2.32304	0.234859	4.92161	3.47697	0.348806	3.07506	0.543061	0.895362	3.6519	1.43209	0.592146	1.17064	0.823592	0.364105	0.611818	1.26669	0.572847	0.278452
	PD591	PD	1.39118	0.926288	3.24575	0.998887	0.994993	0.484649	0.525024	0.577829	0.444974	1.22494	0.915144	0.311225	1.27984	0.796966	0.46543	0.666748	1.01092	0.461444	0.624652	0.205212	0.158311	0.247504	0.168952	0.130645	3.88084	1.77141	0.350371	1.16074	8.25984	3.37408	0.185972	3.95087	3.33665	0.519719	3.36043	0.695939	0.697224	2.69117	1.43668	0.567059	1.01832	0.705269	0.235461	0.421266	0.859542	0.389316	0.23673
	C022	Control	1.38755	1.38904	4.75447	1.02413	0.994286		2.67758	2.54516	0.995329	0.452969	0.404078	0.128025	0.557129	0.283402	0.17347	0.316748	0.510623	0.206176	0.375914	0.081705	0.0820137	0.177718	0.151361	0.102543	1.98871	1.17296	0.190431	0.782523	3.94025	2.2693	0.116391	2.17624	1.96784	0.45132	1.85064	0.65137	0.558198	1.28819	0.850139	0.380687	0.727628	0.413721	0.154795	0.139224	0.71458	0.286512	0.149946
	C023	Control	0.625441	0.722729	3.08975	0.638306	0.80939	0.406844	1.36783	2.34487	1.71034	0.0467934	0.0203837	0.0125139	0.0391445	0.0305825	0.0254023	0.0524294	0.0800462	0.0414465	0.0310657	0.00641798	0.003337	0.0231808	0.0105938	0.0274951	0.321771	0.246225	0.0577838	0.145832	0.722346	0.710426	0.0252061	0.346884	0.540377	0.155531	0.542365	0.243782	0.158097	0.294095	0.288946	0.125218	0.428458	0.0816224	0.0375638	0.0448182	0.226791	0.0860079	0.0331797
	C030	Control	1.66661	1.93926	3.40161	2.25862	2.01062	1.80522	1.19008	0.803908		1.41705	0.924654	0.334375	1.36302	0.836353	0.555441	0.851792	1.13087	0.504257	0.823586	0.221351	0.173759	0.226894	0.170977	0.146777	5.83763	2.23152	0.442193	1.42856	11.9293	3.79037	0.207809	4.08861	4.0245	0.674605	3.34824	0.849192	0.71024	3.23958	1.46223	0.722057	1.30663	0.587507	0.196434	0.516449	1.09943	0.59967	0.347545
	C008	Control	2.34787	1.87166	3.61546	7.77897	8.76584	7.04191	2.42637	1.52588	1.32246	0.647159	0.466942	0.16212	0.635587	0.398235	0.23279	0.357333	0.534792	0.272891	0.469288	0.136918	0.208482	0.300881	0.185156	0.171404	4.30615	2.24774	0.429415	1.27834	9.12439	3.02008	0.145435	3.30474	3.25356	0.46038	2.72474	0.597179	0.719434	2.65394	1.20326	0.524251	1.06884	0.463658	0.283621	0.318018	0.956841	0.476243	0.164546
	C015	Control	0.746774	0.591721	1.87175	3.60283	4.26729	2.17493	2.20475	3.04931	3.74548	0.272506	0.247637	0.0459795	0.188111	0.124323	0.0837708	0.241054	0.309918	0.141275	0.449306	0.0598046	0.0595328	0.0845242	0.0567434	0.0451381	4.35912	2.12385	0.377344	1.91253	7.1694	3.12351	0.154284	3.19813	2.61535	0.55052	2.62786	0.640634	0.72693	2.15161	0.990114	0.44323	1.24079	0.508944	0.300096	0.235135	1.11447	0.453177	0.162702
	C026	Control	3.54078	3.0627	8.9951	0.907095	1.09651	0.73533	3.38661	3.48195	3.40885	0.171362	0.0856301	0.0295854	0.132729	0.0931271	0.0504434	0.142226	0.261746	0.119446	0.147818	0.0239957	0.0324486	0.103202	0.0706371	0.0867948	0.911708	0.582743	0.0974034	0.370062	2.09599	1.553	0.0398452	0.965233	1.13737	0.248578	1.10486	0.472335	0.330188	0.739566	0.386948	0.162852	0.620178	0.150386	0.0825732	0.0863604	0.442222	0.142787	0.0607629
	C032	Control	2.99708	3.13217	5.74598	1.26404	1.61958	1.13866	1.65722	1.77972	3.0553	0.14182	0.109464	0.0369313	0.144716	0.0842497	0.06482	0.106641	0.171129	0.0822076	0.155219	0.0294146	0.0800404	0.204536	0.127563	0.143987	1.24442	0.82741	0.15212	0.484766	2.7366	2.17338	0.0564186	1.03395	1.37337	0.36978	1.52305	0.710917	0.332134	0.847015	0.67286	0.210224	1.07131	0.183983	0.098516	0.117182	0.604691	0.214476	0.0596839
	C054	Control	1.18798	1.03277	3.14827	1.75384	2.73467	0.794138	0.736946	0.816121	0.169935	0.358302	0.303755	0.0850225	0.271329	0.192138	0.112373	0.19362	0.374333	0.174388	0.563292	0.072204	0.0963639	0.129451	0.100423	0.0840342	3.87937	1.87037	0.355522	1.77884	6.81589	2.71595	0.151639	2.98056	2.64239	0.428864	2.68863	0.613559	0.587562	2.22485	1.19936	0.481182	1.05597	0.535889	0.218872	0.2366	0.961365	0.437837	0.167998
	C064	Control	0.423626	0.277825	1.06384	0.280131	0.432269	0.244581	1.06005	1.67119	0.261731	1.59802	1.55036	0.445687	2.16822	0.956774	0.616353	0.756963	1.22393	0.474187	0.894821	0.244029	0.0975585	0.131353	0.139682	0.0954479	2.37976	1.57546	0.301845	0.854978	7.97679	1.96298	0.146572	5.24225	3.14431	0.368854	2.40016	0.751618	0.771087	2.22555	1.23077	0.536448	0.711607	1.02545	0.244037	0.465459	0.852514	0.337986	0.175703
	C076	Control	0.902033	0.723414	1.68558	0.32501	0.629259	0.691853	0.622993	0.629738	0.614702	0.184593	0.19598	0.0686546	0.275296	0.165344	0.0929512	0.157086	0.26399	0.118611	0.271333	0.0499901	0.0473983	0.121586	0.0848717	0.0824616	1.52266	0.949463	0.15221	0.811173	2.55283	1.36302	0.0817723	1.46498	1.2212	0.288595	1.3918	0.475346	0.38873	0.886955	0.653966	0.274956	0.789847	0.336039	0.118512	0.09328	0.723741	0.354466	0.11789
		GROUPS	ANALYSIS	AC02	AC04	AC11	BA03	BA05	BA06_BA07	BA15	BA16H	BA18	Cer_02	Cer_03	Cer_04	Cer_05	Cer_06	Cer_07	Cer_09	Cer_10_Cer_11	Cer_12	Cer_13	Cer_16	ChoE_07	ChoE_08	ChoE_12	ChoE_17	DAPC03	DAPC04	DAPC05	DAPC06	DAPC07	DAPC08	DAPC09	DAPC11	DAPC12	DAPC13	DAPC14	DAPC15	DAPC18	DAPC19	DAPC20	DAPC23	DAPC24	DAPC26	DAPC28	DAPC29	DAPC30	DAPC32
			Class	Fatty esters	Fatty esters	Fatty esters	Bile acids	Bile acids	Bile acids	Bile acids	Bile acids	Bile acids	Sphingolipids	Sphingolipids	Sphingolipids	Sphingolipids	Sphingolipids	Sphingolipids	Sphingolipids	Sphingolipids	Sphingolipids	Sphingolipids	Sphingolipids	Sterols	Sterols	Sterols	Sterols	Glycerophospholipids	Glycerophospholipids	Glycerophospholipids	Glycerophospholipids	Glycerophospholipids	Glycerophospholipids	Glycerophospholipids	Glycerophospholipids	Glycerophospholipids	Glycerophospholipids	Glycerophospholipids	Glycerophospholipids	Glycerophospholipids	Glycerophospholipids	Glycerophospholipids	Glycerophospholipids	Glycerophospholipids	Glycerophospholipids	Glycerophospholipids	Glycerophospholipids	Glycerophospholipids	Glycerophospholipids
			Subclass A	Acylcarnitines	Acylcarnitines	Acylcarnitines	Primary bile acids	Primary bile acids		Glycine-conjugated bile acids	Glycine-conjugated bile acids	Glycine-conjugated bile acids	Ceramides	Ceramides	Ceramides	Ceramides	Ceramides	Ceramides	Ceramides	Ceramides	Ceramides	Ceramides	Ceramides	Cholesteryl Ester	Cholesteryl Ester	Cholesteryl Ester	Cholesteryl Ester	Diacylglycerophosphocholine	Diacylglycerophosphocholine	Diacylglycerophosphocholine	Diacylglycerophosphocholine	Diacylglycerophosphocholine	Diacylglycerophosphocholine	Diacylglycerophosphocholine	Diacylglycerophosphocholine	Diacylglycerophosphocholine	Diacylglycerophosphocholine	Diacylglycerophosphocholine	Diacylglycerophosphocholine	Diacylglycerophosphocholine	Diacylglycerophosphocholine	Diacylglycerophosphocholine	Diacylglycerophosphocholine	Diacylglycerophosphocholine	Diacylglycerophosphocholine	Diacylglycerophosphocholine	Diacylglycerophosphocholine	Diacylglycerophosphocholine	Diacylglycerophosphocholine
			Subclass B										CER[NS]	CER[NS]	CER[NS]	CER[NS]	CER[NS]	CER[NS]	CER[NS]	CER[NS]	CER[NS]	CER[NS]	CER[NS]
			Subclass C										Sphingoid base d18:1	Sphingoid base d18:1	Sphingoid base d18:1	Sphingoid base d18:1	Mixed sphingoid base	Sphingoid base d18:1	Sphingoid base d18:1	Mixed sphingoid base	Mixed sphingoid base	Sphingoid base d18:1	Sphingoid base d18:1
			Common name or function	L-Octanoylcarnitine	Decanoylcarnitine	Oleoylcarnitine	CA (31% bile)	CDCA (45% bile)	UDCA + HDCA	GCA	GCDCA	GDCA
			Individual notation	AC(8:0)	AC(10:0)	AC(18:1n-9)	Cholic acid	Chenodeoxycholic acid	Ursodeoxycholic + Hyodeoxycholic acid	Glycocholic acid	Glycochenodeoxycholic acid	Glycodeoxycholic acid	Cer(d18:1/16:0)	Cer(d18:1/20:0)	Cer(d18:1/21:0)	Cer(d18:1/22:0)	Cer(40:2)	Cer(d18:1/23:0)	Cer(d18:1/24:0)	Cer(d18:1/24:1)+Cer(d18:2/24:0)	Cer(42:3)	Cer(d18:1/18:0)	Cer(d18:1/19:0)	ChoE(18:1)	ChoE(18:2)	ChoE(20:4)	ChoE(22:6)	PC(16:0/16:0)	PC(32:1)	PC(14:0/18:2)	PC(16:0/18:0)	PC(16:0/18:1)	PC(16:0/18:2)	PC(14:0/20:4)	PC(18:0/18:1)	PC(18:0/18:2)	PC(18:2/18:2)	PC(16:0/20:4)	PC(16:0/20:5)	PC(18:0/20:3)	PC(18:0/20:4)	PC(38:5)	PC(18:2/20:4)	PC(16:0/22:6)	PC(18:0/22:4)	PC(40:5)	PC(18:0/22:5)	PC(18:0/22:6)	PC(18:1/22:6)
			Individual composition or probable ID																										PC(16:0/16:1) + PC(14:1/18:0) + PC(14:0/18:1)													PC(18:1/20:4) + PC(16:0/22:5)
			Link	HMDB00791	HMDB00651	HMDB05065	HMDB00619	HMDB00518	HMDB00946	HMDB00138	HMDB00637	HMDB00631	HMDB04949	HMDB04951		HMDB04952		HMDB00950	HMDB04956			HMDB04950		HMDB00918	HMDB00610	HMDB06726	HMDB06733	HMDB00564		HMDB07874	HMDB07970	HMDB07972	HMDB07973	HMDB07883	HMDB08038	HMDB08039	HMDB08138	HMDB07982	HMDB07984	HMDB08046	HMDB08048		HMDB08147	HMDB07991	HMDB08054		HMDB08056	HMDB08057	HMDB08123
			Simplified name	AC	AC	AC	BA	BA	BA	BA	BA	BA	Cer	Cer	Cer	Cer	Cer	Cer	Cer	Cer	Cer	Cer	Cer	ChoE	ChoE	ChoE	ChoE	PC_DAPC	PC_DAPC	PC_DAPC	PC_DAPC	PC_DAPC	PC_DAPC	PC_DAPC	PC_DAPC	PC_DAPC	PC_DAPC	PC_DAPC	PC_DAPC	PC_DAPC	PC_DAPC	PC_DAPC	PC_DAPC	PC_DAPC	PC_DAPC	PC_DAPC	PC_DAPC	PC_DAPC	PC_DAPC
			Simple name	AC	AC	AC	BA	BA	BA	BA	BA	BA	Cer	Cer	Cer	Cer	Cer	Cer	Cer	Cer	Cer	Cer	Cer	ChoE	ChoE	ChoE	ChoE	PC	PC	PC	PC	PC	PC	PC	PC	PC	PC	PC	PC	PC	PC	PC	PC	PC	PC	PC	PC	PC	PC
		PD	Mean	1.80196	1.71435	2.99796	1.57523	1.97131	1.74474	2.21317	2.16081	2.09691	1.31961	0.855515	0.332274	1.17933	0.745497	0.458423	0.751256	1.09623	0.49871	0.943714	0.234641	0.21709	0.310933	0.215004	0.21886	4.40601	1.92636	0.372514	1.36401	8.73461	2.84095	0.204163	3.54713	3.02753	0.732367	2.78969	0.6791	0.810769	2.80989	1.23453	0.558376	1.08631	0.598519	0.305249	0.478528	1.00654	0.48585
			90% Winsored mean	1.81291		2.98955	1.50027	1.71156		2.00303	1.87419	2.04718	1.31304	0.853672	0.320015	1.17002	0.72977	0.454491	0.74749	1.09636	0.486202	0.89437	0.232547	0.206607	0.282975	0.203936	0.200021	4.36864	1.92876	0.376383	1.37037	8.66785	2.83225		3.48323	2.97685	0.510052	2.77611	0.678875	0.808336	2.75718	1.21898	0.559053	1.07839	0.589736	0.308092	0.479203	0.999599	0.48993
			Median	1.65469	1.54787	3.22924	1.16078	1.61474	1.14195	1.51002	1.55004	1.3471	0.995342	0.672989	0.241332	0.906722	0.542401	0.337592	0.570337	0.822843	0.384916	0.612822	0.209012	0.168517	0.23686	0.177059	0.155169	4.70304	1.972	0.400139	1.3789	9.01144	2.84308	0.208721	3.83776	3.06195	0.540228	3.03105	0.758159	0.863303	3.03525	1.35134	0.617959	1.11348	0.629053	0.321199	0.521624	1.04266	0.515594
			SEM	0.184082	0.113273	0.313629	0.286095	0.415558	0.406427	0.446374	0.489378	0.523876	0.291748	0.162037	0.072437	0.233183	0.143796	0.0956695	0.162474	0.238818	0.103119	0.220177	0.0414057	0.0365997	0.0582058	0.0315311	0.0384284	0.351687	0.156033	0.0316848	0.105949	0.843742	0.20463	0.0190954	0.310204	0.219439	0.244117	0.204979	0.060737	0.066033	0.24494	0.0964525	0.0373059	0.0857627	0.0503081	0.0245738	0.0541678	0.0774525	0.0380648
			SD	0.823239	0.467035	1.40259	1.27945	1.85843	1.72432	1.99625	2.18857	2.34284	1.30474	0.724654	0.323948	1.04283	0.643074	0.427847	0.726607	1.06803	0.461163	0.98466	0.185172	0.163679	0.260304	0.141011	0.171857	1.57279	0.697801	0.138111	0.473819	3.77333	0.915134	0.0810148	1.38727	0.981359	1.09173	0.916695	0.271624	0.295308	1.09541	0.431348	0.166837	0.383542	0.224984	0.107115	0.236112	0.346378	0.16592
			Coefficient of Variation	0.456858	0.272427	0.467849	0.812234	0.942738	0.988298	0.901983	1.01285	1.11729	0.98873	0.847038	0.974942	0.884257	0.862611	0.933301	0.96719	0.974273	0.924712	1.04339	0.78917	0.753967	0.837171	0.655854	0.785237	0.356965	0.362238	0.370754	0.347371	0.431997	0.322122	0.396815	0.391097	0.324145	1.49068	0.328601	0.399977	0.364233	0.38984	0.349404	0.298789	0.353069	0.375902	0.350909	0.493413	0.344126	0.341506
			IQR	0.806389	0.683007	1.60339	1.70073	1.02341	1.10193	1.43465	1.53542	1.04254	0.715889	0.698558	0.238247	0.944037	0.470376	0.330602	0.407112	0.442903	0.178476	0.488341	0.1837	0.13008	0.104934	0.0687532	0.0784543	1.95199	0.77762	0.161033	0.33263	4.76061	1.06374	0.0938004	1.83957	0.925585	0.267827	1.07782	0.387274	0.349052	1.34378	0.436617	0.144633	0.32172	0.260827	0.131886	0.233966	0.405659	0.170408
			Kurtosis	-0.593668	-0.681698	-0.887027	0.462437	7.93513	4.8719	4.09717	6.27724	1.27382	2.68603	1.01593	2.62581	1.73576	1.94194	2.3226	2.94556	2.97649	3.20258	3.37824	1.09878	2.94341	5.2914	3.11241	5.16799	-0.243076	0.189724	-0.25295	-0.231272	-0.371678	-0.726609	0.349327	-0.0661591	0.269366	12.5118	-0.768629	-1.41278	-0.681068	-0.543561	-0.278553	-0.520767	-0.325701	-0.27404	-0.430898	0.800211	-0.540137	0.135946
			Skewness	-0.0318675	0.386591	-0.422166	1.13559	2.7758	2.22921	2.01418	2.44517	1.67722	1.92575	1.38234	1.82588	1.59667	1.64995	1.7861	2.00526	2.02708	2.04218	2.0383	1.3656	1.76948	2.31292	1.81799	2.28677	0.0528157	0.469047	0.245276	0.193165	0.326463	0.191606	0.508251	0.248104	0.118753	3.66789	-0.48736	-0.285373	-0.0266845	-0.233262	-0.0895294	-0.86242	0.0115695	0.0279447	0.0446717	0.675233	-0.428349	0.196947
			Shapiro test (W)	0.961451	0.966895	0.938945	0.857584	0.626674	0.674996	0.749035	0.68092	0.660944	0.688869	0.810675	0.737334	0.772507	0.774999	0.725985	0.663964	0.647503	0.669618	0.684857	0.831054	0.791311	0.68433	0.771472	0.67775	0.971882	0.941075	0.967894	0.969214	0.976707	0.983262	0.950416	0.962927	0.95532	0.376876	0.950411	0.925887	0.982308	0.96837	0.96701	0.865819	0.971839	0.957262	0.973985	0.920619	0.964927	0.973388
			Shapiro test (p)	0.573229	0.762092	0.228997	0.00716117	5.63528e-06	4.14761e-05	0.000164783	2.30258e-05	1.35122e-05	2.86126e-05	0.00125196	0.00011538	0.000345679	0.000374766	8.22928e-05	1.46293e-05	9.53364e-06	1.69934e-05	2.56313e-05	0.00260835	0.000642927	2.52655e-05	0.000334314	2.11324e-05	0.794025	0.251249	0.7337	0.738189	0.884903	0.968967	0.431576	0.603841	0.455071	2.91922e-08	0.373369	0.128661	0.9603	0.720141	0.690914	0.00992883	0.793158	0.49071	0.852356	0.116189	0.646187	0.841578
			Box-Cox Transformation (lambda)	1	0.3	1.5	0	-0.2	-0.4	-0.2	-0.2	-0.4	-0.1	0	-0.1	-0.1	-0.1	-0.1	-0.2	-0.3	-0.2	-0.1	0.1	0	-0.3	-0.1	-0.6	0.9	0.6	0.8	0.9	0.7	0.7	0.6	0.8	0.9	-0.6	1.8	1.5	1	1.3	1.1	3	1.1	1	0.9	0.6	1.6	0.9
		Control	Mean	1.58257	1.47433	3.73718	1.9833	2.33597	1.67039	1.73304	1.86479	1.69824	0.529057	0.430888	0.134889	0.577528	0.316453	0.200782	0.317589	0.486138	0.213488	0.418164	0.092583	0.0880933	0.150333	0.109801	0.0986083	2.67513	1.38278	0.255627	0.98476	5.50638	2.2682	0.112537	2.48016	2.19202	0.399703	2.02024	0.600593	0.52826	1.65514	0.89386	0.38611	0.902127	0.42872	0.173502	0.225253	0.769664	0.338916
			90% Winsored mean	1.58257	1.47433	3.73718	1.9833	2.33597		1.73304	1.86479		0.529057	0.430888	0.134889	0.577528	0.316453	0.200782	0.317589	0.486138	0.213488	0.418164	0.092583	0.0880933	0.150333	0.109801	0.0986083	2.67513	1.38278	0.255627	0.98476	5.50638	2.2682	0.112537	2.48016	2.19202	0.399703	2.02024	0.600593	0.52826	1.65514	0.89386	0.38611	0.902127	0.42872	0.173502	0.225253	0.769664	0.338916
			Median	1.28776	1.21091	3.27494	1.14408	1.35805	0.794138	1.51252	1.72545	1.32246	0.315404	0.275696	0.0768385	0.273313	0.178741	0.102662	0.217337	0.342126	0.157832	0.41261	0.0660043	0.081027	0.130402	0.113993	0.0911214	2.18424	1.37421	0.246138	0.833075	5.37807	2.22134	0.130913	2.5784	2.29159	0.399322	2.1254	0.627097	0.57288	1.7199	0.920126	0.411958	0.92291	0.43869	0.175615	0.187179	0.788128	0.346226
			SEM	0.334046	0.319497	0.733674	0.717994	0.803154	0.703541	0.287536	0.309512	0.458981	0.172403	0.148885	0.0456579	0.215067	0.102676	0.0671014	0.0864453	0.123395	0.0502786	0.0901623	0.0260392	0.0196761	0.0250681	0.0174027	0.0142334	0.572802	0.230087	0.0449413	0.188384	1.14646	0.292006	0.0187411	0.491284	0.353976	0.0473948	0.277151	0.0538097	0.0672227	0.30683	0.123201	0.0603762	0.0907755	0.0860944	0.0281771	0.0516044	0.0907113	0.0506179
			SD	1.05635	1.01034	2.32008	2.2705	2.53979	2.11062	0.909268	0.978764	1.37694	0.545186	0.470814	0.144383	0.680102	0.324689	0.212193	0.273364	0.39021	0.158995	0.285118	0.0823432	0.0622213	0.0792722	0.0550323	0.0450099	1.81136	0.7276	0.142117	0.595724	3.62542	0.923403	0.0592646	1.55358	1.11937	0.149875	0.876428	0.170161	0.212577	0.970281	0.389595	0.190926	0.287057	0.272254	0.0891039	0.163187	0.286854	0.160068
			Coefficient of Variation	0.667487	0.685286	0.62081	1.14481	1.08725	1.26355	0.524666	0.524867	0.810807	1.03049	1.09266	1.07038	1.17761	1.02603	1.05684	0.860747	0.802674	0.744746	0.681833	0.889399	0.706312	0.527312	0.5012	0.456451	0.67711	0.526188	0.555955	0.604943	0.658403	0.407108	0.526622	0.626402	0.510655	0.374967	0.433825	0.283322	0.402409	0.586225	0.435857	0.494486	0.318201	0.63504	0.513561	0.724464	0.372701	0.472294
			IQR	1.39196	1.19946	2.29347	1.42693	1.69805	1.11337	1.2784	1.50153	2.44059	0.423941	0.320133	0.114403	0.460408	0.268601	0.148403	0.201246	0.266443	0.137393	0.355544	0.0885566	0.0468279	0.0900333	0.0742459	0.0507716	2.88547	1.20256	0.219746	0.831802	5.17617	1.28856	0.0876152	2.13638	1.75959	0.149455	1.24883	0.190226	0.370853	1.36838	0.543599	0.287077	0.355083	0.307156	0.13423	0.198408	0.328071	0.216857
			Kurtosis	-1.1993	-1.33759	-0.0220061	1.35312	1.22047	1.7122	-1.33728	-1.48616	-1.73652	-0.690933	0.43477	-0.367058	0.26324	-0.701887	-0.640716	-0.716588	-0.790627	-0.943586	-1.3032	-1.03659	-0.80812	-0.864427	-1.28101	-1.25577	-1.47863	-1.6981	-1.81024	-1.50078	-1.42487	-1.19904	-1.48269	-1.33301	-1.5057	-0.922987	-1.40621	-0.468628	-1.54787	-1.59006	-1.52061	-1.34952	-1.51045	-0.237276	-1.59783	-1.23452	-1.11414	-1.31476
			Skewness	0.626639	0.522801	0.959046	1.57626	1.54396	1.74454	0.390027	0.217465	0.335328	1.01463	1.30183	1.09381	1.29357	1.00525	1.06277	0.966418	0.912864	0.821878	0.340716	0.780757	0.62365	0.312273	-0.264737	0.0762666	0.322467	-0.117722	0.0154788	0.212198	0.281711	-0.0317013	-0.0882174	0.240169	0.0874607	0.153101	-0.163583	-0.591706	-0.3471	0.125651	-0.16135	0.133538	-0.10224	0.691001	-0.00534486	0.612134	-0.461059	-0.0733784
			Shapiro test (W)	0.904323	0.894391	0.893357	0.735444	0.735919	0.655612	0.945906	0.94246	0.891381	0.78364	0.793533	0.795585	0.758462	0.788226	0.754549	0.814559	0.82516	0.84907	0.947448	0.856951	0.925072	0.975172	0.972964	0.95283	0.936946	0.923637	0.913394	0.950048	0.943393	0.990437	0.935243	0.960536	0.959296	0.985906	0.961617	0.949558	0.902582	0.93458	0.94922	0.957443	0.946128	0.921271	0.960227	0.890472	0.945615	0.97762
			Shapiro test (p)	0.244225	0.189918	0.184939	0.00237318	0.00240496	0.000429417	0.620387	0.580695	0.206148	0.00916831	0.0120973	0.012813	0.00452458	0.0104261	0.00405422	0.0217768	0.0292537	0.0566265	0.638417	0.0702365	0.401202	0.934225	0.916886	0.702029	0.519558	0.388293	0.305131	0.669064	0.591349	0.997314	0.501387	0.791972	0.777812	0.988921	0.80414	0.663271	0.233816	0.494421	0.659284	0.756372	0.62297	0.367674	0.788452	0.171664	0.616999	0.951171
			Box-Cox Transformation (lambda)	0	0.2	0.1	-0.1	-0.3	-0.3	0.3	0.7	0.4	0	0.2	0	0	0	-0.2	0	0.1	0.1	0.6	0.3	0.6	0.8	1.3	0.9	0.5	0.9	0.6	0.7	0.6	1	1	0.7	0.8	0.8	1.2	2.1	1.5	0.7	1.2	0.8	1.1	0.4	0.9	0.1	1.7	1.1
		COMPARISON	ANALYSIS	AC02	AC04	AC11	BA03	BA05	BA06_BA07	BA15	BA16H	BA18	Cer_02	Cer_03	Cer_04	Cer_05	Cer_06	Cer_07	Cer_09	Cer_10_Cer_11	Cer_12	Cer_13	Cer_16	ChoE_07	ChoE_08	ChoE_12	ChoE_17	DAPC03	DAPC04	DAPC05	DAPC06	DAPC07	DAPC08	DAPC09	DAPC11	DAPC12	DAPC13	DAPC14	DAPC15	DAPC18	DAPC19	DAPC20	DAPC23	DAPC24	DAPC26	DAPC28	DAPC29	DAPC30	DAPC32
			Class	Fatty esters	Fatty esters	Fatty esters	Bile acids	Bile acids	Bile acids	Bile acids	Bile acids	Bile acids	Sphingolipids	Sphingolipids	Sphingolipids	Sphingolipids	Sphingolipids	Sphingolipids	Sphingolipids	Sphingolipids	Sphingolipids	Sphingolipids	Sphingolipids	Sterols	Sterols	Sterols	Sterols	Glycerophospholipids	Glycerophospholipids	Glycerophospholipids	Glycerophospholipids	Glycerophospholipids	Glycerophospholipids	Glycerophospholipids	Glycerophospholipids	Glycerophospholipids	Glycerophospholipids	Glycerophospholipids	Glycerophospholipids	Glycerophospholipids	Glycerophospholipids	Glycerophospholipids	Glycerophospholipids	Glycerophospholipids	Glycerophospholipids	Glycerophospholipids	Glycerophospholipids	Glycerophospholipids	Glycerophospholipids
			Subclass A	Acylcarnitines	Acylcarnitines	Acylcarnitines	Primary bile acids	Primary bile acids		Glycine-conjugated bile acids	Glycine-conjugated bile acids	Glycine-conjugated bile acids	Ceramides	Ceramides	Ceramides	Ceramides	Ceramides	Ceramides	Ceramides	Ceramides	Ceramides	Ceramides	Ceramides	Cholesteryl Ester	Cholesteryl Ester	Cholesteryl Ester	Cholesteryl Ester	Diacylglycerophosphocholine	Diacylglycerophosphocholine	Diacylglycerophosphocholine	Diacylglycerophosphocholine	Diacylglycerophosphocholine	Diacylglycerophosphocholine	Diacylglycerophosphocholine	Diacylglycerophosphocholine	Diacylglycerophosphocholine	Diacylglycerophosphocholine	Diacylglycerophosphocholine	Diacylglycerophosphocholine	Diacylglycerophosphocholine	Diacylglycerophosphocholine	Diacylglycerophosphocholine	Diacylglycerophosphocholine	Diacylglycerophosphocholine	Diacylglycerophosphocholine	Diacylglycerophosphocholine	Diacylglycerophosphocholine	Diacylglycerophosphocholine	Diacylglycerophosphocholine
			Subclass B										CER[NS]	CER[NS]	CER[NS]	CER[NS]	CER[NS]	CER[NS]	CER[NS]	CER[NS]	CER[NS]	CER[NS]	CER[NS]
			Subclass C										Sphingoid base d18:1	Sphingoid base d18:1	Sphingoid base d18:1	Sphingoid base d18:1	Mixed sphingoid base	Sphingoid base d18:1	Sphingoid base d18:1	Mixed sphingoid base	Mixed sphingoid base	Sphingoid base d18:1	Sphingoid base d18:1
			Common name or function	L-Octanoylcarnitine	Decanoylcarnitine	Oleoylcarnitine	CA (31% bile)	CDCA (45% bile)	UDCA + HDCA	GCA	GCDCA	GDCA
			Individual notation	AC(8:0)	AC(10:0)	AC(18:1n-9)	Cholic acid	Chenodeoxycholic acid	Ursodeoxycholic + Hyodeoxycholic acid	Glycocholic acid	Glycochenodeoxycholic acid	Glycodeoxycholic acid	Cer(d18:1/16:0)	Cer(d18:1/20:0)	Cer(d18:1/21:0)	Cer(d18:1/22:0)	Cer(40:2)	Cer(d18:1/23:0)	Cer(d18:1/24:0)	Cer(d18:1/24:1)+Cer(d18:2/24:0)	Cer(42:3)	Cer(d18:1/18:0)	Cer(d18:1/19:0)	ChoE(18:1)	ChoE(18:2)	ChoE(20:4)	ChoE(22:6)	PC(16:0/16:0)	PC(32:1)	PC(14:0/18:2)	PC(16:0/18:0)	PC(16:0/18:1)	PC(16:0/18:2)	PC(14:0/20:4)	PC(18:0/18:1)	PC(18:0/18:2)	PC(18:2/18:2)	PC(16:0/20:4)	PC(16:0/20:5)	PC(18:0/20:3)	PC(18:0/20:4)	PC(38:5)	PC(18:2/20:4)	PC(16:0/22:6)	PC(18:0/22:4)	PC(40:5)	PC(18:0/22:5)	PC(18:0/22:6)	PC(18:1/22:6)
			Individual composition or probable ID																										PC(16:0/16:1) + PC(14:1/18:0) + PC(14:0/18:1)													PC(18:1/20:4) + PC(16:0/22:5)
			Link	HMDB00791	HMDB00651	HMDB05065	HMDB00619	HMDB00518	HMDB00946	HMDB00138	HMDB00637	HMDB00631	HMDB04949	HMDB04951		HMDB04952		HMDB00950	HMDB04956			HMDB04950		HMDB00918	HMDB00610	HMDB06726	HMDB06733	HMDB00564		HMDB07874	HMDB07970	HMDB07972	HMDB07973	HMDB07883	HMDB08038	HMDB08039	HMDB08138	HMDB07982	HMDB07984	HMDB08046	HMDB08048		HMDB08147	HMDB07991	HMDB08054		HMDB08056	HMDB08057	HMDB08123
			Simplified name	AC	AC	AC	BA	BA	BA	BA	BA	BA	Cer	Cer	Cer	Cer	Cer	Cer	Cer	Cer	Cer	Cer	Cer	ChoE	ChoE	ChoE	ChoE	PC_DAPC	PC_DAPC	PC_DAPC	PC_DAPC	PC_DAPC	PC_DAPC	PC_DAPC	PC_DAPC	PC_DAPC	PC_DAPC	PC_DAPC	PC_DAPC	PC_DAPC	PC_DAPC	PC_DAPC	PC_DAPC	PC_DAPC	PC_DAPC	PC_DAPC	PC_DAPC	PC_DAPC	PC_DAPC
			Simple name	AC	AC	AC	BA	BA	BA	BA	BA	BA	Cer	Cer	Cer	Cer	Cer	Cer	Cer	Cer	Cer	Cer	Cer	ChoE	ChoE	ChoE	ChoE	PC	PC	PC	PC	PC	PC	PC	PC	PC	PC	PC	PC	PC	PC	PC	PC	PC	PC	PC	PC	PC	PC
		PD vs. Control	Diff mean	0.219383	0.24002	-0.739223	-0.408067	-0.364658	0.0743548	0.480131	0.29602	0.398671	0.790551	0.424627	0.197385	0.601799	0.429044	0.257642	0.433666	0.610092	0.285222	0.52555	0.142058	0.128997	0.1606	0.105203	0.120252	1.73088	0.543588	0.116887	0.379254	3.22824	0.572748	0.0916256	1.06697	0.835504	0.332664	0.769457	0.0785064	0.282509	1.15476	0.340667	0.172266	0.184181	0.169799	0.131747	0.253276	0.236881	0.146934
			Effect size (Glass's Delta)	0.207681	0.237564	-0.31862	-0.179726	-0.143578	0.0352289	0.528041	0.302443	0.289534	1.45006	0.901899	1.36709	0.884866	1.3214	1.21418	1.58641	1.5635	1.79391	1.84327	1.7252	2.07319	2.02594	1.91167	2.67168	0.955572	0.747096	0.822472	0.636626	0.890446	0.620258	1.54604	0.686785	0.746406	2.2196	0.877946	0.461365	1.32897	1.19012	0.874414	0.902264	0.641619	0.623677	1.47858	1.55205	0.825789	0.917946
			F test to compare two variances (F)	0.607348	0.213681	0.365474	0.317547	0.535422	0.667446	4.81997	4.99993	2.89505	5.72738	2.36898	5.03407	2.35113	3.92273	4.0655	7.06507	7.49148	8.41287	11.9268	5.05702	6.92001	10.7825	6.56558	14.5787	0.753937	0.919767	0.94442	0.632607	1.08326	0.98217	1.8687	0.797368	0.768616	53.0598	1.094	2.5481	1.92983	1.27455	1.22583	0.763577	1.78521	0.682897	1.44512	2.09346	1.45807	1.07446
			F test to compare two variances (p)	0.344351	0.00725205	0.0619621	0.0337828	0.240962	0.459059	0.020185	0.0177441	0.127203	0.0108986	0.185898	0.0173224	0.189711	0.040695	0.0361389	0.00499214	0.00399298	0.00255056	0.000634394	0.0170457	0.00539999	0.000954	0.00658057	0.000278202	0.575057	0.831376	0.871092	0.382889	0.946075	0.920567	0.341196	0.644087	0.598466	1.08125e-06	0.932759	0.152245	0.312959	0.733222	0.782621	0.590438	0.375134	0.461695	0.584542	0.258157	0.573964	0.954807
			Student's t-test (t)	0.626085	0.708061	-1.0902	-0.527973	-0.447997	0.0980939	0.904256	0.511225	0.472202	2.33283	1.67669	2.3052	1.65021	2.42823	2.20479	2.35637	2.26958	2.48616	2.20892	2.90431	3.10436	2.53415	2.92111	2.93443	2.70326	1.98375	2.14535	1.89717	2.2368	1.61128	3.13045	1.9094	2.09903	1.33774	2.19784	0.831897	2.68688	2.8213	2.10238	2.54249	1.33809	1.81773	3.32349	3.02128	1.8623	2.29337
			Student's t-test (p)	0.53633	0.493249	0.284917	0.60719	0.657602	0.92264	0.373602	0.613225	0.640577	0.0272078	0.104736	0.0288292	0.110075	0.021859	0.035855	0.0260385	0.0315904	0.0196615	0.0367861	0.00713391	0.00446065	0.0179422	0.00695902	0.00732015	0.0115389	0.0571662	0.0410761	0.0681631	0.0334434	0.118337	0.00427811	0.0665068	0.0449553	0.195705	0.0363955	0.412506	0.0119958	0.00869646	0.0446379	0.0168206	0.191633	0.079822	0.00256361	0.00545331	0.0730859	0.0298388
			Student's t-test (power)	0.0812707	0.0884514	0.124901	0.0733278	0.0648215	0.0507901	0.260599	0.117313	0.10707	0.950817	0.613481	0.925969	0.597154	0.908688	0.856763	0.976814	0.973505	0.993928	0.995739	0.990284	0.999318	0.998981	0.99745	0.999999	0.663509	0.461334	0.527978	0.354957	0.602522	0.339925	0.964966	0.402378	0.460652	0.999819	0.59047	0.210099	0.911742	0.842793	0.587048	0.613829	0.359589	0.343045	0.95419	0.969107	0.539379	0.620028
			Wilcoxon signed-rank test (W)	119	109	87	98	104	97	105	89	94	157	146	155	149	156	153	154	151	155	146	162	169	155	159	167	155	134	135	139	147	132	149	139	141	135	148	120	156	156	143	155	129	148	157	160	146	140
			Wilcoxon signed-rank test (p)	0.422273	0.24287	0.588437	0.948316	0.879765	0.432655	0.845779	0.649616	0.871432	0.0110795	0.0439194	0.0145815	0.0311152	0.0127294	0.0189741	0.0166571	0.0244242	0.0145815	0.0439194	0.00528693	0.0016219	0.0145815	0.00831925	0.00231712	0.0145815	0.142583	0.0694066	0.0905702	0.0392466	0.168639	0.00364365	0.0905702	0.0744606	0.130729	0.0349888	0.397431	0.0127294	0.0127294	0.0606921	0.0145815	0.213911	0.0349888	0.00343984	0.00200929	0.0439194	0.0396243
			fold change	1.13862	1.1628	0.802198	0.794248	0.843895	1.04451	1.27704	1.15874	1.23476	2.49426	1.98547	2.46331	2.04203	2.35579	2.28319	2.36549	2.25498	2.33601	2.2568	2.53439	2.46432	2.0683	1.95813	2.21949	1.64703	1.39311	1.45726	1.38512	1.58627	1.25251	1.81418	1.4302	1.38116	1.83228	1.38087	1.13071	1.53479	1.69768	1.38112	1.44616	1.20416	1.39606	1.75934	2.12441	1.30777	1.43354
			log2(fold change)	0.187292	0.217602	-0.31797	-0.332338	-0.244865	0.0628312	0.352809	0.21256	0.304226	1.31861	0.989479	1.3006	1.03	1.23621	1.19105	1.24214	1.17311	1.22404	1.17428	1.34164	1.30119	1.04845	0.969474	1.15023	0.719865	0.478313	0.543256	0.470014	0.665641	0.324824	0.859318	0.516221	0.465877	0.873639	0.465582	0.177235	0.618042	0.763565	0.465838	0.532224	0.268031	0.481361	0.815035	1.08706	0.387111	0.519582
			robust fold change	1.28493	1.27827	0.986046	1.01459	1.18901	1.43798	0.998348	0.898338	1.01863	3.15577	2.44105	3.14077	3.31753	3.03457	3.28839	2.62421	2.40509	2.43877	1.48523	3.16665	2.07976	1.81638	1.55324	1.70288	2.15317	1.435	1.62567	1.65519	1.67559	1.27989	1.59436	1.48843	1.33617	1.35286	1.42611	1.209	1.50695	1.76478	1.46865	1.50005	1.20649	1.43394	1.829	2.78676	1.32295	1.48918
			log2(robust fold change)	0.361692	0.354197	-0.0202731	0.0208983	0.249767	0.524044	-0.00238569	-0.15467	0.0266361	1.65799	1.2875	1.65112	1.73011	1.60149	1.71738	1.39188	1.26609	1.28616	0.57069	1.66296	1.05642	0.86107	0.635282	0.767976	1.10646	0.521054	0.70103	0.727001	0.744668	0.356022	0.672974	0.573787	0.418102	0.436016	0.512081	0.273813	0.591635	0.819491	0.554487	0.585012	0.270818	0.51998	0.871056	1.47859	0.403764	0.574521
			fold change - bootsrap resampling method	1.1897	1.22298	0.83501	0.941962	0.971439	1.25595	1.32007	1.20082	1.34902	2.86338	2.28686	2.83353	2.45968	2.67481	2.60723	2.59653	2.49588	2.53582	2.40478	2.82584	2.60647	2.11988	2.01187	2.25659	1.74758	1.44903	1.50105	1.45736	1.69343	1.26813	1.87057	1.50843	1.41648	1.835	1.40465	1.15039	1.5657	1.77358	1.40818	1.47843	1.21696	1.46263	1.82079	2.26988	1.33799	1.46691
			log2(fold change) - bootstrap resampling method	0.250593	0.290397	-0.260135	-0.0862588	-0.0418054	0.328778	0.400611	0.264018	0.431913	1.51772	1.19337	1.5026	1.29847	1.41944	1.38252	1.37658	1.31955	1.34245	1.26591	1.49868	1.3821	1.08398	1.00854	1.17414	0.805354	0.535089	0.585967	0.543357	0.75995	0.342706	0.903478	0.593048	0.502306	0.87578	0.490207	0.202121	0.646808	0.826665	0.493827	0.564066	0.283281	0.548566	0.864563	1.18262	0.420067	0.552784
			95% lower confidence interval	-0.465878	-0.379686	-0.962975	-1.42803	-1.30929	-1.27176	-0.441563	-0.607875	-0.748802	0.228333	-0.0894133	0.16371	-0.115621	0.231375	0.0505714	0.244217	0.198048	0.298034	0.211803	0.436678	0.441782	0.298307	0.361372	0.50684	0.112153	-0.0214598	0.0040233	-0.0614542	0.0477703	-0.104177	0.334918	-0.0537663	-0.0273406	-0.021744	0.0355631	-0.225768	0.180679	0.154997	0.0359384	0.0613308	-0.103962	-0.116405	0.323211	0.371483	-0.0108184	0.0504066
			95% upper confidence interval	1.0278	0.998538	0.410108	1.03609	1.06744	1.55107	1.14361	1.04064	1.58817	2.73422	2.39963	2.84159	2.62715	2.58066	2.55535	2.3709	2.31884	2.24559	2.13812	2.5068	2.18554	1.79291	1.63567	1.82075	1.53419	1.17625	1.19577	1.26778	1.58439	0.80581	1.53616	1.33145	1.09287	1.83652	0.991486	0.584047	1.13424	1.5239	0.976564	1.10414	0.677614	1.23058	1.4318	1.95586	0.860357	1.07982
		ROC Analysis	AUC	0.595	0.641176	0.565	0.51	0.52	0.598765	0.525	0.555	0.522222	0.785	0.73	0.775	0.745	0.78	0.765	0.77	0.755	0.775	0.73	0.81	0.845	0.775	0.795	0.835	0.775	0.67	0.710526	0.695	0.735	0.66	0.827778	0.695	0.705	0.675	0.74	0.6	0.78	0.78	0.715	0.775	0.645	0.74	0.826316	0.842105	0.73	0.736842
			AUC (se)	0.108853	0.108766	0.110903	0.11338	0.113053	0.114653	0.112869	0.111477	0.11707	0.0837923	0.0933216	0.0856775	0.0909216	0.0847437	0.087493	0.0865939	0.0892405	0.0856775	0.0933216	0.0787599	0.0708804	0.0856775	0.0818352	0.0732381	0.0856775	0.101533	0.0974871	0.0983747	0.0925376	0.102693	0.0774492	0.0983747	0.0970075	0.10093	0.0917376	0.108463	0.0847437	0.0847437	0.0955795	0.0856775	0.104327	0.0917376	0.0764411	0.0727788	0.0933216	0.0935111
			AUC(p)	0.331285	0.258171	0.384743	0.482412	0.464758	0.333338	0.455908	0.402575	0.462193	0.0445058	0.108919	0.0542629	0.0889393	0.0492633	0.0649614	0.059498	0.0765419	0.0542629	0.108919	0.0245336	0.00747314	0.0542629	0.035741	0.0110962	0.0542629	0.201249	0.140123	0.160816	0.102086	0.217984	0.0171689	0.160816	0.145343	0.192989	0.0954233	0.322405	0.0492633	0.0492633	0.130354	0.0542629	0.243548	0.0954233	0.0164039	0.00937889	0.108919	0.102688
			Sensitivity	0.8	0.941176	0.2	0.2	0.8	0.777778	0.2	0.6	1	0.75	0.85	0.65	0.9	0.85	0.85	0.75	0.75	0.75	0.75	0.85	0.85	0.9	0.75	0.65	0.6	0.9	0.894737	0.9	0.5	0.75	0.722222	0.6	0.75	0.65	0.6	0.4	0.6	0.6	0.55	0.75	0.55	0.65	0.842105	0.789474	0.45	0.842105
			Specificity	0.6	0.5	1	0.95	0.4	0.555556	1	0.6	0.222222	0.8	0.6	0.8	0.6	0.7	0.7	0.8	0.8	0.8	0.7	0.7	0.8	0.6	0.8	0.9	0.9	0.5	0.5	0.6	0.9	0.6	0.9	0.8	0.7	0.8	0.9	1	1	0.9	0.9	0.9	0.8	0.9	0.7	0.8	1	0.6
			Positive predictive value	0.8	0.761905	1	0.666667	0.727273	0.777778	1	0.428571	0.740741	0.882353	0.809524	0.866667	0.818182	0.85	0.85	0.882353	0.882353	0.882353	0.833333	0.85	0.894737	0.818182	0.882353	0.928571	0.923077	0.782609	0.772727	0.818182	0.909091	0.789474	0.928571	0.857143	0.833333	0.866667	0.923077	1	1	0.923077	0.916667	0.9375	0.846154	0.928571	0.842105	0.882353	1	0.8
			Negative predictive value	0.6	0.833333	0.714286	0.703704	0.5	0.555556	0.384615	0.75	1	0.615385	0.666667	0.533333	0.75	0.7	0.7	0.615385	0.615385	0.615385	0.583333	0.7	0.727273	0.75	0.615385	0.5625	0.529412	0.714286	0.714286	0.75	0.473684	0.545455	0.642857	0.5	0.583333	0.533333	0.529412	0.454545	0.555556	0.529412	0.5	0.642857	0.470588	0.5625	0.7	0.666667	0.47619	0.666667
			Precision	0.8	0.761905	1	0.666667	0.727273	0.777778	1	0.428571	0.740741	0.882353	0.809524	0.866667	0.818182	0.85	0.85	0.882353	0.882353	0.882353	0.833333	0.85	0.894737	0.818182	0.882353	0.928571	0.923077	0.782609	0.772727	0.818182	0.909091	0.789474	0.928571	0.857143	0.833333	0.866667	0.923077	1	1	0.923077	0.916667	0.9375	0.846154	0.928571	0.842105	0.882353	1	0.8
			Recall	0.8	0.941176	0.2	0.2	0.8	0.777778	0.2	0.6	1	0.75	0.85	0.65	0.9	0.85	0.85	0.75	0.75	0.75	0.75	0.85	0.85	0.9	0.75	0.65	0.6	0.9	0.894737	0.9	0.5	0.75	0.722222	0.6	0.75	0.65	0.6	0.4	0.6	0.6	0.55	0.75	0.55	0.65	0.842105	0.789474	0.45	0.842105
			Youden Index	0.4	0.441176	0.2	0.15	0.2	0.333333	0.2	0.2	0.222222	0.55	0.45	0.45	0.5	0.55	0.55	0.55	0.55	0.55	0.45	0.55	0.65	0.5	0.55	0.55	0.5	0.4	0.394737	0.5	0.4	0.35	0.622222	0.4	0.45	0.45	0.5	0.4	0.6	0.5	0.45	0.65	0.35	0.55	0.542105	0.589474	0.45	0.442105
			Cutoff	1.39118	1.13693	5.74598	3.60283	0.994993	0.845604	3.81842	1.67119	0.342892	0.66673	0.3465	0.164924	0.298562	0.293634	0.176345	0.370502	0.613832	0.327076	0.48246	0.0879642	0.105358	0.144032	0.158103	0.147878	4.67815	1.18755	0.223046	0.857565	9.56293	2.32304	0.156054	3.68356	2.71497	0.501233	2.89649	0.851565	0.849831	2.69117	1.35068	0.546128	1.10273	0.604566	0.227919	0.34297	1.12594	0.360874
[truncated: 211 more columns]

## Sheet: Raw data per chemical class_2
SQRT TRASFORMED DATA
COD.OWL	SAMPLE.ID	Group	AC	BAs_total	Cer	Cer_PC	ChoE	ChoE_LPC	Chol_PC	DAG	DAPC	DAPE	FAA	FBA	FFA.16.1	FFA.18.1	FFA.18.2	GCBA	Lipids	LPC	LPE	LPI	MAG	MAPC_total	MAPE_total	MAPI	MEMAPC	MEMAPC.O_plasmanyles	MEMAPC.P_plasmenyles	MEMAPE	MEMAPE.O_plasmanyles	MEMAPE.P_plasmenyles	Membrane.Lipids	MEPC.O_plasmanyles	MEPC.P_plasmenyles	MEPE.O_plasmanyles	MEPE.P_plasmenyles	MUFA	NAE	NEFA_omega_3	NEFA_omega_6	NEFA_omega_9	NEFA_total	PC	PC.DHA	PC_20.4	PC_PEMT	PE	PE.DHA
CLASS			Acylcarnitines	Bile Acids	Sphingolipids	Ceramides and PC	Sterols	ChoE and LPC	Cho01 and PC	Glycerolipids	Glycerophospholipids	Glycerophospholipids	Fatty amides	Bile Acids	Non-esterified fatty acids	Non-esterified fatty acids	Non-esterified fatty acids	Bile Acids	All the lipids	Glycerophospholipids	Glycerophospholipids	Glycerophospholipids	Glycerolipids	Glycerophospholipids	Glycerophospholipids	Glycerophospholipids	Glycerophospholipids	Glycerophospholipids	Glycerophospholipids	Glycerophospholipids	Glycerophospholipids	Glycerophospholipids	Glycerophospholipids + Diacylglycerols	Glycerophospholipids	Glycerophospholipids	Glycerophospholipids	Glycerophospholipids	Non-esterified fatty acids	Fatty amides	Non-esterified fatty acids	Non-esterified fatty acids	Non-esterified fatty acids	Non-esterified fatty acids	Glycerophospholipids	Glycerophospholipids	Glycerophospholipids	Glycerophospholipids	Glycerophospholipids	Glycerophospholipids
COMMON NAME OR FUNCTION					Hepatic fatty acid uptake is regulated by the sphingolipid acyl chain length. Biochim Biophys Acta. 2014 Dec;1841(12):1754-66.	Cer and PC		ChoE and LPC	UC and PC	Promote curvature elastic stress in membranes. Proc Natl Acad Sci U S A. 2000 Aug 1;97(16):9032-6.					FFA with 16:1 FA chains	FFA with 18:1 FA chains	FFA with 18:2 FA chains																												PC with 22:6 FA	PC with 20:4 FA(arachidonic acid)	Glycerophospholipids potentially derived from PE methylation		PE with 22:6 FA
INDIVIDUAL NOTATION			Acylcarnitines	Bile Acids	Ceramides		Cholesteryl Esters			Diacylglycerols	Diacylglycerophosphocholine	Diacylglycerophosphoethanolamine	Primary fatty amides	Free bile acids				Glycine-conjugated bile acids	PC+PE+LPC+LPE+PI+LPI+PS+PG+LPG+DAG+TAG+NEFA+SL	Lysophosphatidylcholines	Lysophosphatidylethanolamines	Lysophosphatidylinositols	Total Monoacylglycerols	Monoacylglycerophosphocholine	Monoacylglycerophosphoethanolamine	Monoacylglycerophosphoinositol	1-ether, 2-acylglycerophosphocholines	1-ether, 2-acylglycerophosphocholines O_plasmanyles	1-ether, 2-acylglycerophosphocholines P_plasmenyles	1-ether, 2-acylglycerophosphoethanolamine	1-ether, 2-acylglycerophosphoethanolamine O_plasmanyles	1-ether, 2-acylglycerophosphoethanolamine P_plasmenyles	PC+PE+LPC+LPE+PI+LPI+PS+PG+LPG(+DAG)	1-Monoetherglycerophosphocholine O_plasmanyles	1-Monoetherglycerophosphocholine P_plasmenyles	1-Monoetherglycerophosphoethanolamine O_plasmanyles	1-Monoetherglycerophosphoethanolamine P_plasmenyles	Monounsaturated fatty acids	N-Acyl ethanolamines	NEFA omega 3	NEFA omega 6	NEFA omega 9	Non-esterified fatty acids	Phosphatidylcholines	PC-DHA	PC 20:4	PE PEMT	Phosphatidylethanolamines	PE-DHA
INDIVIDUAL COMPOSITION OR PROBABLE ID
Owl-NBM-002	PD354	PD	0.744794	4.95463	28.9049	91.1792	1.17376	62.0794	62.2743	8.02631	47.5242	5.42864	10.9471	2.71432	6.08832	12.7785	5.20744	2.24031	435.318	60.9057	98.247	14.3864	2.40234	50.3845	77.6403	14.3864	14.7501	6.53349	8.21663	7.90178	1.73083	4.59539	345.151	3.03759	7.48364	3.87127	16.7355	20.98	11.1258	11.9745	23.6027	12.9557	106.181	62.2743	2.54042	12.1572	21.8497	13.3304	2.84485
Owl-NBM-003	PD423	PD	7.31969	8.12532	4.30509	86.418	1.96305	142.002	82.1129	6.11817	66.9479	0.591457	8.82973	5.54577	6.18094	18.8126	10.6553	2.57955	481.129	140.039	93.2087	25.0133	1.49156	130.334	76.4509	25.0133	15.165	7.71842	7.44657	0.91145		0.786262	374.771	2.83208	6.8724	2.18793	14.5699	26.2848	12.7125	13.6994	24.8522	19.4796	137.674	82.1129	4.33911	15.7629	32.8438	1.50291	0.496742
Owl-NBM-004	PD436	PD	4.44476	2.65127	8.85798	63.8531	0.387819	69.127	54.9951	3.78861	47.3757	3.44984	3.3301	0.967187	3.88992	12.6035	5.3101	1.68409	348.193	68.7392	121.732	21.3824	0.633283	64.0768	101.342	21.3824	7.61941	3.69796	3.92146	4.98216	0.878157	2.94299	304.666	1.64857	3.01385	2.70133	17.6887	17.2532	6.39605	16.8555	26.9399	13.1844	112.907	54.9951	3.5399	10.1118	20.6804	8.432	1.92611
Owl-NBM-005	PD520	PD	4.47267	4.2186	4.80173	64.4707	0.514414	63.162	59.669	2.20074	48.7429	3.81535	1.45159	1.33802	3.54757	13.6454	7.91757	2.88058	315.045	62.6476	103.572	15.1011	0.462013	54.6799	84.6332	15.1011	10.9261	4.97812	5.94794	5.07293	0.796739	3.58396	275.999	2.28888	5.67885	2.58501	16.354	18.1878	5.99564	24.2842	38.3683	16.642	118.109	59.669	3.50636	15.2278	23.7729	8.88828	1.67002
Owl-NBM-006	PD530	PD	6.33142	12.4162	7.12359	73.0002	1.7612	83.1769	65.8766	4.86764	53.8983	2.39287	4.73186	7.16506	5.53669	19.0404	9.96391	5.25118	405.194	81.4157	108.633	15.6316	0.82166	73.4309	92.2615	15.6316	11.9783	5.84907	6.12926	3.93013	0.573408	2.55906	308.47	2.29339	5.6914	2.06505	14.3065	25.6699	13.5702	19.276	34.0297	19.781	159.01	65.8766	3.78787	14.8897	27.7113	6.323	1.64917
Owl-NBM-007	PD357	PD	1.0679	2.46817	29.9519	71.756	3.48155	56.0096	41.804	12.3072	33.2183	1.43886	7.61705	0.842447	7.43264	20.7344	23.5963	1.62573	377.765	52.528	91.816	10.0199	2.32915	43.1152	67.3764	10.0199	8.58577	3.83196	4.75381	2.71263	0.588894	1.79575	281.627	2.68148	6.73135	4.4738	19.9658	31.956	6.1239	21.5719	55.3757	22.3865	174.893	41.804	0.829246	5.79258	15.2516	4.15148	0.790663
Owl-NBM-008	PD450	PD	9.65365	23.4554	12.7212	114.897	0.715103	77.5407	102.175	6.11457	82.2492	5.28688	7.6375	8.66908	6.23823	19.4689	10.7998	14.7863	503.422	76.8256	130.76	16.6955	1.56682	67.5676	109.703	16.6955	19.9263	9.69212	10.2342	8.1115	1.32637	5.2757	389.394	3.22303	6.035	3.48344	17.5743	27.0152	15.8561	23.781	40.7567	20.9875	164.068	102.175	5.19468	21.3315	39.9114	13.3984	2.66836
Owl-NBM-009	PD495	PD	7.81786	8.48904	7.59522	70.7424	0.8579	79.6507	63.1472	3.42993	52.2264	3.52485	2.93008	3.59473	3.8252	15.5273	8.47061	4.89432	411.533	78.7928	134.501	18.6587	0.71671	70.0018	114.549	18.6587	10.9208	5.15684	5.76393	4.9933	0.854904	3.30608	334.38	3.02496	5.76611	2.99537	16.9565	20.3015	9.90642	25.7639	40.2659	17.5752	143.041	63.1472	3.56401	14.3184	25.3799	8.51816	1.60212
Owl-NBM-010	PD501	PD	7.06153	7.8206	2.1942	30.6383	0.620295	66.2882	28.4441	1.92942	23.4698	1.38592	1.98727	3.95473	10.2047	19.7822	11.9281	3.86587	346.25	65.6679	121.751	14.724	0.266148	57.1762	104.48	14.724	4.97428	2.37118	2.6031	1.79773	0.255265	1.20425	247.583	2.9002	5.59148	2.46451	14.8067	31.0433	13.3798	19.1453	34.2468	19.9216	156.223	28.4441	1.60735	6.3288	11.7951	3.18365	0.729498
Owl-NBM-011	PD537	PD	7.96172	11.4395	3.24461	39.6149	0.644939	84.3533	36.3703	1.44933	29.3672	2.19463	0.972207	6.41078	4.85449	16.6693	10.0525	5.0287	330.88	83.7084	115.934	15.6188	0.217912	74.1781	97.7652	15.6188	7.00309	3.53802	3.46507	3.13731	0.487704	2.15486	273.254	3.72623	5.80398	3.02994	15.1386	22.4271	6.21126	24.8722	43.1665	19.1394	134.907	36.3703	2.43689	8.54627	13.9131	5.33194	1.04972
Owl-NBM-012	PD550	PD	8.7742	6.14045	4.61782	56.89	0.706001	81.4429	52.2722	2.42543	40.9338	3.20916	1.78074	2.1254	6.9059	21.4775	12.8152	4.01506	365.212	80.7369	108.414	21.8633	0.384683	72.0433	86.5661	21.8633	11.3384	5.00096	6.3374	3.93557	0.559037	2.87071	292.074	2.21082	6.48282	2.98886	18.8593	29.5205	8.02523	21.415	37.9071	22.7569	141.743	52.2722	2.96268	14.0162	20.5845	7.14473	1.2417
Owl-NBM-013	PD562	PD	7.9771	5.71603	3.38054	41.8066	0.578861	55.5115	38.426	3.62269	30.8893	1.47457	3.3252	2.99499	5.68948	21.8292	11.1201	2.72105	332.928	54.9327	81.711	11.4724	0.684712	48.8236	70.0878	11.4724	7.53667	3.35001	4.18666	2.66236	0.401218	1.72138	209.08	1.69448	4.41455	1.50042	10.1227	28.8468	13.088	20.7267	39.153	23.5536	169.768	38.426	2.1654	8.64561	15.9337	4.13692	0.944654
Owl-NBM-014	PD636	PD	7.8307	34.5341	1.37832	19.2572	0.269567	60.3588	17.8789	0.826361	14.5266	1.01583	0.406557	19.9953	4.98803	16.7457	10.9892	14.5388	285.85	60.0892	105.167	15.244	0.122068	52.2996	87.3644	15.244	3.3523	1.56807	1.78423	1.39464	0.238024	0.946897	208.471	2.78255	5.00705	2.41098	15.3917	22.5967	9.92984	30.6641	47.2999	19.048	147.038	17.8789	1.05398	4.19653	7.09773	2.41047	0.444774
Owl-NBM-015	PD295	PD	6.94501	10.9281	5.15499	69.7624	0.866302	97.2172	64.6074	3.79291	52.8466	3.43298	3.57702	4.91946	9.30421	22.405	13.3341	6.00866	446.614	96.3509	149.899	21.412	0.697046	85.2832	126.035	21.412	11.7608	5.62844	6.13232	4.83216	0.8619	3.16856	370.167	3.36296	7.70476	3.33364	20.531	33.0677	14.9037	28.2325	51.0137	25.2409	196.858	64.6074	3.28229	14.6871	25.4173	8.26514	1.57643
Owl-NBM-016	PD340	PD	8.09111	31.9223	5.54968	68.6718	0.534646	79.1216	63.1221	3.09219	52.3102	2.98863	2.85949	5.51469	4.82095	16.9106	8.98585	26.4076	380.107	78.5869	120.252	18.131	0.739356	70.0895	101.006	18.131	10.8119	5.58998	5.22193	4.08449	0.636059	2.67618	314.984	3.15184	5.34556	2.97433	16.2717	23.0087	12.1093	18.8003	34.3122	17.9243	139.816	63.1221	3.33508	13.1885	25.6538	7.07313	1.46521
Owl-NBM-017	PD356	PD	1.06289	9.12145	11.255	72.4665	1.14759	56.6563	61.2115	6.19094	49.9585	3.38269	3.13508	3.85548	3.31562	12.8603	5.55913	5.26597	323.548	55.5087	87.6466	8.18813	0.776149	51.4907	73.9977	8.18813	11.253	5.77763	5.47537	4.58113	0.751779	3.03366	258.076	1.30246	2.71557	1.96687	11.682	18.0369	14.5965	25.5823	41.0874	11.8653	148.49	61.2115	2.96777	12.5266	24.5984	7.96382	1.39909
Owl-NBM-018	PD541	PD	5.71838	9.38411	7.28785	73.0375	0.917641	77.504	65.7496	4.27374	55.0172	3.31087	2.95119	3.02108	5.09905	17.0868	9.50406	6.36303	382.984	76.5864	104.654	15.7175	0.954167	69.7918	88.3614	15.7175	10.7324	5.12906	5.60339	4.52517	0.749599	2.99295	303.647	2.002	4.79256	2.4555	13.8373	22.9443	10.9298	18.5374	30.6748	17.6991	136.055	65.7496	3.80588	14.9143	26.9681	7.83605	1.69172
Owl-NBM-019	PD546	PD	8.28381	13.2752	2.3044	45.4705	0.625816	77.5426	43.1661	1.45333	34.6726	2.26904	0.887015	4.18242	3.61907	15.6974	9.27895	9.09279	333.847	76.9168	126.827	13.6366	0.351538	68.607	108.728	13.6366	8.49341	4.28468	4.20873	2.99535	0.488717	1.99006	284.162	3.00663	5.30309	2.68099	15.4173	20.3778	9.12663	20.5435	38.9721	17.2916	128.407	43.1661	2.66706	10.0192	17.2218	5.26439	1.11102
Owl-NBM-020	PD579	PD	8.01983	20.667	9.71226	74.3442	0.765882	59.998	64.6319	4.41806	53.3854	3.25159	3.58231	12.0467	5.47346	16.5612	7.83015	8.62026	370.272	59.2321	124.285	12.6283	0.844632	52.7232	103.307	12.6283	11.2465	5.56118	5.68532	4.64306	0.747334	3.0462	303.638	2.35838	4.15048	3.18831	17.7898	22.927	10.2473	18.1716	31.1067	16.5505	139.246	64.6319	3.57895	14.0457	25.6281	7.89465	1.75417
Owl-NBM-021	PD591	PD	5.56321	4.02636	7.96253	63.4458	0.705412	74.0467	55.4833	3.26624	45.2869	3.34323	2.11663	2.47853	4.27282	14.9688	8.21064	1.54783	364.274	73.3413	122.746	18.1906	0.583816	64.7086	99.6965	18.1906	10.1965	4.52206	5.6744	4.63017	0.947489	3.06405	304.992	2.47359	6.15913	3.07941	19.9704	20.414	8.52184	18.3343	34.8794	16.2639	126.795	55.4833	2.71346	12.8588	22.5009	7.9734	1.26513
Owl-NBM-022	C022	Control	7.53106	8.23649	3.49024	36.6795	0.513636	89.337	33.1893	1.30272	26.4681	2.29344	0.955402	2.01841	3.85288	15.1251	8.8308	6.21808	353.329	88.8234	137.474	22.2973	0.225575	78.0281	111.386	22.2973	6.7212	3.28527	3.43593	3.12046	0.613701	2.07309	303.593	3.61725	7.17802	3.95672	22.1306	20.04	9.70132	20.193	33.2436	16.8337	121.898	33.1893	2.02174	7.49797	12.7481	5.4139	0.982055
Owl-NBM-023	C023	Control	4.43792	7.27758	0.386226	9.16519	0.0646067	31.0885	8.77896	0.333566	6.89036	0.602969	0.106264	1.85454	3.92579	12.3293	8.14088	5.42304	138.17	31.0239	47.1707	14.3	0.0196995	23.6246	35.7354	14.3	1.8886	0.907031	0.981571	0.656224	0.113505	0.454198	106.295	2.46526	4.93401	1.69004	9.74526	16.6536	5.13964	14.8873	20.6225	12.33	69.9988	8.77896	0.798167	2.12298	3.5806	1.25919	0.273207
Owl-NBM-025	C030	Control	7.00747	8.06846	8.96274	78.0963	0.718407	74.5284	69.1335	4.53142	56.1867	3.98266	3.61081	6.07447	5.56563	20.3619	10.9886	1.99399	428.914	73.8099	145.22	14.5139	0.912171	63.3932	122.683	14.5139	12.9469	6.18719	6.75966	5.66038	0.937432	3.78461	347.124	3.68023	6.73654	3.31771	19.2188	27.1031	13.8943	22.9036	37.0678	20.5896	170.911	69.1335	3.62646	14.5849	28.326	9.64304	2.00951
Owl-NBM-026	C008	Control	7.83499	28.8614	4.31406	59.4049	0.865923	68.9229	55.0909	2.62897	45.481	2.35365	2.27776	23.5867	4.69031	17.4993	8.81899	5.27471	329.129	68.057	95.4254	14.112	0.600632	61.462	81.2755	14.112	9.60989	4.88917	4.72071	3.2382	0.523405	2.08862	262.829	2.28476	4.31024	2.13751	12.0123	23.2698	11.1055	18.5199	32.7767	18.5567	139.921	55.0909	2.88687	11.2868	22.0241	5.59185	1.29196
Owl-NBM-027	C015	Control	3.21025	19.0446	2.16368	52.8284	0.245939	54.9887	50.6647	1.11055	42.1768	2.99207	0.976175	10.045	2.35725	10.2933	5.46797	8.99954	296.297	54.7428	113.568	20.6479	0.336521	47.9742	94.3301	20.6479	8.48792	3.96756	4.52036	3.64163	0.6044	2.27987	265.586	2.14239	4.62617	3.33312	15.9052	13.1214	6.43262	20.7532	30.5242	11.4359	97.9509	50.6647	3.18499	9.8575	19.8609	6.6337	1.58084
Owl-NBM-028	C026	Control	15.5986	13.0163	1.25811	19.048	0.293083	87.4331	17.7899	0.835947	14.4996	1.52258	0.686628	2.73893	6.22889	20.5295	14.1627	10.2774	368.303	87.14	163.304	21.9637	0.112395	74.1996	136.935	21.9637	3.29032	1.59424	1.69607	1.60972	0.351642	0.983344	302.085	4.21301	8.72739	3.42556	22.943	28.2245	10.2242	24.7665	42.7488	23.1853	153.834	17.7899	1.34388	3.77233	7.55396	3.13231	0.666327
Owl-NBM-029	C032	Control	11.8752	10.5145	1.12661	24.2414	0.556127	86.9456	23.1148	0.824761	19.5743	1.33301	0.449424	4.02229	4.29293	16.5715	10.0476	6.49223	315.699	86.3895	116.13	17.6247	0.156688	76.5909	95.8968	17.6247	3.54055	1.85201	1.68855	1.58053	0.242828	1.064	255.697	3.87801	5.92057	3.28024	16.9532	21.6975	8.05511	21.4985	34.9247	17.3316	123.307	23.1148	2.05015	4.89191	10.124	2.91353	0.608018
Owl-NBM-031	C054	Control	5.36902	7.00565	2.70076	50.6694	0.410273	74.3214	47.9686	1.58698	40.1917	3.24622	1.27529	5.28265	2.8734	11.9061	7.04729	1.723	332.934	73.9111	122.923	19.0242	0.326378	67.151	102.746	19.0242	7.77692	3.82208	3.95484	3.78023	0.566011	2.36401	290.099	2.22993	4.53025	2.53289	17.6439	15.5296	7.94855	15.4556	28.5635	12.8865	95.9574	47.9686	2.81383	10.1375	18.6091	7.02645	1.45888
Owl-NBM-032	C064	Control	1.76529	3.94995	10.9293	58.6567	0.464042	60.3577	47.7274	2.407	39.6053	3.27468	1.87678	0.95698	2.26038	9.40201	4.253	2.99297	277.555	59.8936	86.216	21.9425	0.341967	55.1767	70.5613	21.9425	8.12208	3.73665	4.38543	4.75634	1.06079	2.99065	249.666	1.56875	3.14815	2.287	13.3677	12.2634	4.02241	16.2664	24.2911	11.2065	81.1122	47.7274	2.24604	9.8272	18.2269	8.03102	1.29575
Owl-NBM-033	C076	Control	3.31103	3.51356	1.84383	25.782	0.336317	60.9528	23.9381	0.872078	19.5501	1.9243	0.437985	1.64612	3.0989	11.6162	6.76348	1.86743	256.468	60.6165	103.373	17.6427	0.168088	54.9013	85.4241	17.6427	4.38807	2.0811	2.30697	2.42441	0.417844	1.55516	219.735	1.623	4.09215	2.46543	15.4833	15.286	7.53867	18.6989	29.082	12.6273	98.095	23.9381	2.06027	5.23185	8.97525	4.3487	1.04477
		GROUPS	ANALYSIS	AC	BAs_total	Cer	Cer_PC	ChoE	ChoE_LPC	Chol_PC	DAG	DAPC	DAPE	FAA	FBA	FFA.16.1	FFA.18.1	FFA.18.2	GCBA	Lipids	LPC	LPE	LPI	MAG	MAPC_total	MAPE_total	MAPI	MEMAPC	MEMAPC.O_plasmanyles	MEMAPC.P_plasmenyles	MEMAPE	MEMAPE.O_plasmanyles	MEMAPE.P_plasmenyles	Membrane.Lipids	MEPC.O_plasmanyles	MEPC.P_plasmenyles	MEPE.O_plasmanyles	MEPE.P_plasmenyles	MUFA	NAE	NEFA_omega_3	NEFA_omega_6	NEFA_omega_9	NEFA_total	PC	PC.DHA	PC_20.4	PC_PEMT	PE
			Class	Acylcarnitines	Bile Acids	Sphingolipids	Ceramides and PC	Sterols	ChoE and LPC	Cho01 and PC	Glycerolipids	Glycerophospholipids	Glycerophospholipids	Fatty amides	Bile Acids	Non-esterified fatty acids	Non-esterified fatty acids	Non-esterified fatty acids	Bile Acids	All the lipids	Glycerophospholipids	Glycerophospholipids	Glycerophospholipids	Glycerolipids	Glycerophospholipids	Glycerophospholipids	Glycerophospholipids	Glycerophospholipids	Glycerophospholipids	Glycerophospholipids	Glycerophospholipids	Glycerophospholipids	Glycerophospholipids	Glycerophospholipids + Diacylglycerols	Glycerophospholipids	Glycerophospholipids	Glycerophospholipids	Glycerophospholipids	Non-esterified fatty acids	Fatty amides	Non-esterified fatty acids	Non-esterified fatty acids	Non-esterified fatty acids	Non-esterified fatty acids	Glycerophospholipids	Glycerophospholipids	Glycerophospholipids	Glycerophospholipids	Glycerophospholipids
			Common name or function			Hepatic fatty acid uptake is regulated by the sphingolipid acyl chain length. Biochim Biophys Acta. 2014 Dec;1841(12):1754-66.	Cer and PC		ChoE and LPC	UC and PC	Promote curvature elastic stress in membranes. Proc Natl Acad Sci U S A. 2000 Aug 1;97(16):9032-6.					FFA with 16:1 FA chains	FFA with 18:1 FA chains	FFA with 18:2 FA chains																												PC with 22:6 FA	PC with 20:4 FA(arachidonic acid)	Glycerophospholipids potentially derived from PE methylation
			Individual notation	Acylcarnitines	Bile Acids	Ceramides		Cholesteryl Esters			Diacylglycerols	Diacylglycerophosphocholine	Diacylglycerophosphoethanolamine	Primary fatty amides	Free bile acids				Glycine-conjugated bile acids	PC+PE+LPC+LPE+PI+LPI+PS+PG+LPG+DAG+TAG+NEFA+SL	Lysophosphatidylcholines	Lysophosphatidylethanolamines	Lysophosphatidylinositols	Total Monoacylglycerols	Monoacylglycerophosphocholine	Monoacylglycerophosphoethanolamine	Monoacylglycerophosphoinositol	1-ether, 2-acylglycerophosphocholines	1-ether, 2-acylglycerophosphocholines O_plasmanyles	1-ether, 2-acylglycerophosphocholines P_plasmenyles	1-ether, 2-acylglycerophosphoethanolamine	1-ether, 2-acylglycerophosphoethanolamine O_plasmanyles	1-ether, 2-acylglycerophosphoethanolamine P_plasmenyles	PC+PE+LPC+LPE+PI+LPI+PS+PG+LPG(+DAG)	1-Monoetherglycerophosphocholine O_plasmanyles	1-Monoetherglycerophosphocholine P_plasmenyles	1-Monoetherglycerophosphoethanolamine O_plasmanyles	1-Monoetherglycerophosphoethanolamine P_plasmenyles	Monounsaturated fatty acids	N-Acyl ethanolamines	NEFA omega 3	NEFA omega 6	NEFA omega 9	Non-esterified fatty acids	Phosphatidylcholines	PC-DHA	PC 20:4	PE PEMT	Phosphatidylethanolamines
		PD	Mean	6.25711	11.5877	8.4152	64.5861	0.961888	75.1395	56.1709	4.17969	45.7423	2.85939	3.75279	5.11681	5.56437	17.2802	10.0765	6.47089	377.018	74.1776	112.588	16.1858	0.852289	66.0403	93.5676	16.1858	10.4285	4.98896	5.43959	4.09175	0.730181	2.68575	299.229	2.60011	5.53718	2.82185	16.1985	24.143	10.6378	21.1116	37.4005	18.5124	144.061	56.1709	2.99392	12.1783	22.2357	6.95115
			90% Winsored mean	6.22904	11.4663	8.40364	63.9693	0.891875	72.9251	55.696	3.99679	45.4244	2.87352	3.67094	4.72562	5.53094	17.2602	9.56848	5.89371	377.363	72.1134	112.115	16.1199	0.853421	64.0732	93.1289	16.1199	10.2716	4.93043	5.37965	4.10542	0.731088	2.65976	298.529	2.59925	5.54104	2.81504	16.2484	24.1266	10.5966	21.0763	37.2449	18.4825	143.299	55.696	2.96238	11.9796	22.1172	6.99313
			Median	7.19061	8.80525	6.33664	69.2171	0.710552	75.7754	60.4402	3.70565	48.1336	3.23038	3.04313	3.90511	5.28625	16.8282	9.73398	4.96151	367.742	74.9638	112.283	15.6252	0.706878	66.1381	95.0134	15.6252	10.8663	5.06501	5.63889	4.30483	0.747334	2.90685	303.642	2.73202	5.68512	2.83783	16.3129	22.9357	10.5886	20.6351	38.1377	18.4862	140.78	60.4402	3.12503	13.0236	23.1369	7.49039
			SEM	0.591643	2.04982	1.74478	4.8459	0.162142	4.34405	4.1753	0.594538	3.41191	0.286493	0.635685	0.993052	0.410242	0.688547	0.876407	1.35177	12.5827	4.32189	3.87412	0.932303	0.141649	4.15938	3.52901	0.932303	0.816611	0.40239	0.423675	0.409018	0.0809323	0.24973	10.9034	0.139996	0.289438	0.152419	0.596593	1.07253	0.69642	1.03593	1.82006	0.785184	4.88217	4.1753	0.235815	0.908175	1.66616	0.692631
			SD	2.64591	9.16708	7.80288	21.6715	0.725122	19.4272	18.6725	2.65885	15.2585	1.28124	2.84287	4.44107	1.83466	3.07928	3.91941	6.04531	56.2714	19.3281	17.3256	4.16939	0.633474	18.6013	15.7822	4.16939	3.65199	1.79954	1.89473	1.82919	0.352776	1.11683	48.7613	0.626082	1.2944	0.681638	2.66804	4.79649	3.11448	4.63284	8.13954	3.51145	21.8337	18.6725	1.0546	4.06148	7.45128	3.09754
			Coefficient of Variation	0.422864	0.791104	0.927237	0.335545	0.753853	0.258548	0.332423	0.636136	0.333575	0.44808	0.757536	0.867936	0.329716	0.178196	0.388967	0.934233	0.149254	0.260565	0.153885	0.257596	0.743262	0.281666	0.168672	0.257596	0.350192	0.360705	0.348323	0.447042	0.483135	0.415834	0.162956	0.240791	0.233766	0.241557	0.16471	0.19867	0.292776	0.219445	0.217632	0.189681	0.151558	0.332423	0.352246	0.333502	0.335105	0.445616
			IQR	2.69721	7.1053	4.99759	18.9744	0.365191	18.4495	21.788	2.81012	18.6723	1.42258	1.93406	3.10665	2.01817	4.15951	2.88455	4.24167	73.1618	18.5773	20.8901	4.10866	0.429335	17.9606	20.7156	4.10866	3.16905	1.86728	1.92681	1.94499	0.334524	1.14869	44.5203	0.758748	1.28663	0.662259	2.96642	7.0682	4.76327	5.94456	7.5404	3.56894	23.6373	21.788	1.05321	5.06194	8.7348	3.32069
			Kurtosis	-0.306947	0.532164	2.38656	0.0618243	4.63308	4.29913	0.303482	1.91956	0.0961042	-0.576702	0.145658	3.75277	0.31907	-1.25489	4.44889	3.35471	-0.43049	4.05579	-0.75522	-0.533972	0.622095	4.43105	-0.953307	-0.533972	0.566473	0.586533	0.391119	-0.0184407	1.2895	-0.171872	-0.569533	-0.787281	-0.28801	0.0308814	-0.378061	-1.16814	-1.31669	-0.539698	-0.416092	-0.678812	-0.148567	0.303482	-0.234736	-0.293648	0.0165143	-0.250523
			Skewness	-0.984174	1.28541	1.82912	-0.0349383	2.17877	1.90252	0.175545	1.35971	0.118752	0.143284	1.10131	1.93682	0.985705	0.0490866	1.81473	1.90851	0.638931	1.82668	0.0971542	0.179954	1.25816	1.88825	0.0719347	0.179954	0.446914	0.51712	0.398976	0.424602	1.11386	0.292727	-0.0260603	-0.322326	-0.468119	0.374719	-0.33627	0.380531	-0.0530553	0.0953691	0.296527	-0.0654545	0.451179	0.175545	-0.261152	-0.11831	0.149457	0.312141
			Shapiro test (W)	0.844449	0.81665	0.715932	0.949652	0.706689	0.781054	0.944768	0.875596	0.955138	0.939463	0.853059	0.772461	0.902554	0.95102	0.802121	0.741618	0.950053	0.797993	0.980598	0.978162	0.828105	0.788677	0.976318	0.978162	0.943679	0.95562	0.957511	0.929996	0.896937	0.952543	0.964043	0.974915	0.961254	0.97874	0.96975	0.93983	0.948953	0.979493	0.972173	0.975257	0.974789	0.944768	0.966006	0.946811	0.970407	0.936713
			Shapiro test (p)	0.00430869	0.00154702	6.13733e-05	0.361841	4.70918e-05	0.000456886	0.294553	0.0147568	0.451831	0.234232	0.00600057	0.000345161	0.0460577	0.382835	0.00092938	0.000131339	0.367899	0.000806534	0.941591	0.908226	0.00234039	0.000588519	0.878295	0.908226	0.281135	0.460465	0.495403	0.154391	0.0428371	0.407351	0.627362	0.853258	0.569191	0.916809	0.74959	0.238011	0.351478	0.927388	0.79996	0.859521	0.850916	0.294553	0.669316	0.321264	0.763451	0.207678
			Box-Cox Transformation (lambda)	2.7	-0.1	-0.1	1	-0.4	-1.8	0.8	0.2	0.9	0.8	0.2	0	-0.6	0.9	-0.3	-0.2	-1.2	-1.6	0.6	0.7	0.1	-1.3	0.8	0.7	0.7	0.6	0.7	0.6	0.2	0.7	1.1	1.7	1.9	0.5	1.8	-0.6	1.3	0.9	0.4	1.3	-0.2	0.8	1.3	1	0.9	0.7
		Control	Mean	6.79408	10.9489	3.71756	41.4572	0.446835	68.8876	37.7396	1.6434	31.0624	2.35256	1.26525	5.82262	3.91463	14.5634	8.45213	5.12624	309.68	68.4408	113.08	18.4069	0.320011	60.2502	93.6974	18.4069	6.67724	3.23223	3.44501	3.04681	0.543156	1.96375	260.271	2.77026	5.42035	2.84262	16.5403	19.3189	8.40624	19.3943	31.3845	15.6983	115.298	37.7396	2.30324	7.92109	15.0029	5.39937
			90% Winsored mean	6.79408	10.9489	3.71756	41.4572	0.446835	68.8876	37.7396	1.6434	31.0624	2.35256	1.26525	5.82262	3.91463	14.5634	8.45213	5.12624	309.68	68.4408	113.08	18.4069	0.320011	60.2502	93.6974	18.4069	6.67724	3.23223	3.44501	3.04681	0.543156	1.96375	260.271	2.77026	5.42035	2.84262	16.5403	19.3189	8.40624	19.3943	31.3845	15.6983	115.298	37.7396	2.30324	7.92109	15.0029	5.39937
			Median	6.18825	8.15247	2.43222	43.6744	0.437157	71.6221	40.4583	1.20664	33.0367	2.32355	0.965788	3.38061	3.88934	13.7272	8.47994	5.34888	322.414	70.9335	114.849	18.3334	0.275977	62.4276	95.1135	18.3334	7.24906	3.51096	3.69539	3.17933	0.544708	2.08085	264.208	2.37501	4.78009	2.90657	16.4292	18.3468	8.00183	19.4459	31.6504	14.8601	109.996	40.4583	2.15316	8.66259	15.4875	5.50287
			SEM	1.34518	2.44907	1.10929	6.8996	0.0737667	5.68353	6.0735	0.393432	5.01466	0.328151	0.335136	2.15467	0.418222	1.28148	0.902638	0.950257	24.4886	5.64515	10.3968	1.04005	0.0831439	5.14577	8.96122	1.04005	1.0748	0.515782	0.561968	0.483098	0.091907	0.314009	20.4338	0.309638	0.535696	0.226357	1.32945	1.78763	0.926505	1.02711	1.99864	1.32973	10.265	6.0735	0.269174	1.22677	2.41518	0.807647
			SD	4.25384	7.74463	3.5079	21.8184	0.233271	17.9729	19.2061	1.24414	15.8577	1.0377	1.05979	6.81365	1.32253	4.05239	2.85439	3.00498	77.4398	17.8515	32.8777	3.28893	0.262924	16.2724	28.3379	3.28893	3.39881	1.63105	1.7771	1.52769	0.290635	0.992985	64.6172	0.97916	1.69402	0.715804	4.2041	5.653	2.92987	3.248	6.32027	4.20496	32.4609	19.2061	0.851204	3.87938	7.63747	2.554
			Coefficient of Variation	0.626109	0.707346	0.943602	0.526289	0.522051	0.260902	0.508911	0.757054	0.510513	0.441096	0.837614	1.1702	0.337844	0.278258	0.337713	0.586195	0.250064	0.260832	0.290746	0.178679	0.821608	0.27008	0.30244	0.178679	0.509014	0.504619	0.515847	0.501406	0.535086	0.505656	0.248269	0.353455	0.31253	0.251811	0.254173	0.292615	0.348534	0.167472	0.201382	0.267861	0.281538	0.508911	0.369568	0.489753	0.509067	0.473019
			IQR	4.16626	5.31725	2.70356	32.5731	0.241613	23.3348	26.67	1.35701	22.1244	1.55967	1.21769	3.98101	1.66119	5.57872	2.90893	4.17996	65.9904	23.1955	36.4238	6.32721	0.181067	17.4673	26.9137	6.32721	4.64403	2.02191	2.63783	1.93219	0.243184	1.15619	47.9152	1.50021	2.1673	0.997658	4.92848	7.52987	3.38434	4.4824	5.81131	5.84613	39.3115	26.67	0.839771	5.0906	10.2856	3.49186
			Kurtosis	-0.659409	0.148492	-0.565678	-1.45309	-0.969188	-0.614305	-1.48964	0.1351	-1.54312	-1.31421	-0.280784	1.7009	-1.31707	-1.63524	-0.71983	-1.40817	0.0375358	-0.632102	-0.66433	-1.78139	-0.0604767	-0.0975003	-0.533215	-1.78139	-1.18853	-1.2186	-1.16587	-1.21337	-1.04056	-1.05185	0.608428	-1.7859	-1.00147	-1.49987	-1.28251	-1.55935	-1.00102	-1.42055	-0.873408	-1.4623	-1.37534	-1.48964	-1.12438	-1.35994	-1.33105	-1.25789
			Skewness	0.758453	1.15782	1.01693	0.0800765	0.206869	-0.631332	0.0326059	1.11738	-0.00480956	-0.0872541	0.945751	1.68815	0.321603	0.255485	0.423444	0.310341	-0.695821	-0.614374	-0.38478	-0.137308	1.01794	-0.886712	-0.431197	-0.137308	0.230327	0.229581	0.24072	0.0964159	0.34698	0.208349	-1.06825	0.205689	0.560332	-0.0672423	0.0240263	0.290775	0.260674	0.0768622	0.0261715	0.414803	0.276248	0.0326059	-0.16394	0.0778683	0.14724	0.010232
			Shapiro test (W)	0.914248	0.83264	0.815826	0.95847	0.987618	0.918462	0.955985	0.846552	0.950558	0.979297	0.887324	0.700056	0.952016	0.917086	0.974112	0.914344	0.93693	0.919741	0.978238	0.87624	0.873217	0.89994	0.97282	0.87624	0.958865	0.961722	0.949109	0.979192	0.956576	0.973563	0.874937	0.886717	0.936927	0.940911	0.976285	0.930737	0.981705	0.965328	0.989624	0.898011	0.957869	0.955985	0.969958	0.96073	0.968781	0.987987
			Shapiro test (p)	0.311463	0.0360013	0.0225596	0.768299	0.992985	0.344305	0.739305	0.0528461	0.675105	0.961294	0.158175	0.000882288	0.692387	0.333291	0.926133	0.312183	0.519381	0.3548	0.955043	0.118106	0.108962	0.218764	0.915686	0.118106	0.772862	0.805322	0.657972	0.960699	0.746236	0.921774	0.114081	0.155689	0.519358	0.563196	0.94224	0.455184	0.973637	0.844475	0.996338	0.208323	0.761328	0.739305	0.89046	0.794166	0.879322	0.99371
			Box-Cox Transformation (lambda)	0.2	-0.2	0.1	0.8	0.9	2.2	0.8	0.1	0.9	1.1	0.3	-0.3	0.2	-0.5	0.3	0.6	2.1	2.2	1.7	2.3	0.4	2.7	1.7	2.3	0.6	0.7	0.6	0.9	0.6	0.8	2.8	-0.2	-0.3	1	0.8	-0.3	0.6	0.9	1	-0.7	0.1	0.8	1.3	0.8	0.7	1
		COMPARISON	ANALYSIS	AC	BAs_total	Cer	Cer_PC	ChoE	ChoE_LPC	Chol_PC	DAG	DAPC	DAPE	FAA	FBA	FFA.16.1	FFA.18.1	FFA.18.2	GCBA	Lipids	LPC	LPE	LPI	MAG	MAPC_total	MAPE_total	MAPI	MEMAPC	MEMAPC.O_plasmanyles	MEMAPC.P_plasmenyles	MEMAPE	MEMAPE.O_plasmanyles	MEMAPE.P_plasmenyles	Membrane.Lipids	MEPC.O_plasmanyles	MEPC.P_plasmenyles	MEPE.O_plasmanyles	MEPE.P_plasmenyles	MUFA	NAE	NEFA_omega_3	NEFA_omega_6	NEFA_omega_9	NEFA_total	PC	PC.DHA	PC_20.4	PC_PEMT	PE
			Class	Acylcarnitines	Bile Acids	Sphingolipids	Ceramides and PC	Sterols	ChoE and LPC	Cho01 and PC	Glycerolipids	Glycerophospholipids	Glycerophospholipids	Fatty amides	Bile Acids	Non-esterified fatty acids	Non-esterified fatty acids	Non-esterified fatty acids	Bile Acids	All the lipids	Glycerophospholipids	Glycerophospholipids	Glycerophospholipids	Glycerolipids	Glycerophospholipids	Glycerophospholipids	Glycerophospholipids	Glycerophospholipids	Glycerophospholipids	Glycerophospholipids	Glycerophospholipids	Glycerophospholipids	Glycerophospholipids	Glycerophospholipids + Diacylglycerols	Glycerophospholipids	Glycerophospholipids	Glycerophospholipids	Glycerophospholipids	Non-esterified fatty acids	Fatty amides	Non-esterified fatty acids	Non-esterified fatty acids	Non-esterified fatty acids	Non-esterified fatty acids	Glycerophospholipids	Glycerophospholipids	Glycerophospholipids	Glycerophospholipids	Glycerophospholipids
			Common name or function			Hepatic fatty acid uptake is regulated by the sphingolipid acyl chain length. Biochim Biophys Acta. 2014 Dec;1841(12):1754-66.	Cer and PC		ChoE and LPC	UC and PC	Promote curvature elastic stress in membranes. Proc Natl Acad Sci U S A. 2000 Aug 1;97(16):9032-6.					FFA with 16:1 FA chains	FFA with 18:1 FA chains	FFA with 18:2 FA chains																												PC with 22:6 FA	PC with 20:4 FA(arachidonic acid)	Glycerophospholipids potentially derived from PE methylation
			Individual notation	Acylcarnitines	Bile Acids	Ceramides		Cholesteryl Esters			Diacylglycerols	Diacylglycerophosphocholine	Diacylglycerophosphoethanolamine	Primary fatty amides	Free bile acids				Glycine-conjugated bile acids	PC+PE+LPC+LPE+PI+LPI+PS+PG+LPG+DAG+TAG+NEFA+SL	Lysophosphatidylcholines	Lysophosphatidylethanolamines	Lysophosphatidylinositols	Total Monoacylglycerols	Monoacylglycerophosphocholine	Monoacylglycerophosphoethanolamine	Monoacylglycerophosphoinositol	1-ether, 2-acylglycerophosphocholines	1-ether, 2-acylglycerophosphocholines O_plasmanyles	1-ether, 2-acylglycerophosphocholines P_plasmenyles	1-ether, 2-acylglycerophosphoethanolamine	1-ether, 2-acylglycerophosphoethanolamine O_plasmanyles	1-ether, 2-acylglycerophosphoethanolamine P_plasmenyles	PC+PE+LPC+LPE+PI+LPI+PS+PG+LPG(+DAG)	1-Monoetherglycerophosphocholine O_plasmanyles	1-Monoetherglycerophosphocholine P_plasmenyles	1-Monoetherglycerophosphoethanolamine O_plasmanyles	1-Monoetherglycerophosphoethanolamine P_plasmenyles	Monounsaturated fatty acids	N-Acyl ethanolamines	NEFA omega 3	NEFA omega 6	NEFA omega 9	Non-esterified fatty acids	Phosphatidylcholines	PC-DHA	PC 20:4	PE PEMT	Phosphatidylethanolamines
		PD vs. Control	Diff mean	-0.536972	0.63884	4.69764	23.1289	0.515052	6.25187	18.4313	2.53629	14.68	0.506837	2.48753	-0.705806	1.64973	2.71682	1.62432	1.34465	67.3384	5.73682	-0.492426	-2.22111	0.532277	5.79014	-0.129811	-2.22111	3.75131	1.75673	1.99458	1.04494	0.187025	0.721994	38.9584	-0.170151	0.116833	-0.0207729	-0.341842	4.82408	2.23155	1.71731	6.01605	2.81405	28.7629	18.4313	0.69068	4.25718	7.23278	1.55178
			Effect size (Glass's Delta)	-0.126233	0.0824881	1.33916	1.06006	2.20796	0.34785	0.959658	2.03859	0.925729	0.488422	2.34719	-0.103587	1.2474	0.670424	0.569059	0.447473	0.869557	0.321363	-0.0149775	-0.675328	2.02445	0.355826	-0.00458085	-0.675328	1.10371	1.07706	1.12238	0.684	0.643502	0.727095	0.602909	-0.173772	0.0689681	-0.0290204	-0.0813116	0.853368	0.761655	0.528728	0.951866	0.669221	0.886077	0.959658	0.811415	1.09739	0.947012	0.607585
			F test to compare two variances (F)	0.38689	1.40107	4.94784	0.986577	9.66275	1.16838	0.945207	4.56719	0.925852	1.52445	7.19569	0.424829	1.9244	0.577397	1.88545	4.04721	0.528015	1.17226	0.277699	1.60707	5.80493	1.30673	0.310172	1.60707	1.15453	1.21728	1.13677	1.43366	1.47333	1.26498	0.569448	0.408841	0.583852	0.906816	0.402755	0.71993	1.13	2.03451	1.65855	0.697347	0.452411	0.945207	1.53499	1.09609	0.951837	1.47092
			F test to compare two variances (p)	0.0779372	0.61915	0.0184119	0.926676	0.0014788	0.845038	0.868331	0.0243414	0.840287	0.525746	0.00465662	0.111297	0.315069	0.299977	0.330695	0.0366866	0.23101	0.84067	0.0179643	0.471782	0.0103767	0.702305	0.0303556	0.471782	0.860771	0.791614	0.881356	0.592875	0.56323	0.742667	0.28849	0.0964646	0.3094	0.812266	0.091112	0.520702	0.88932	0.275297	0.441263	0.484663	0.139417	0.868331	0.518502	0.93019	0.877832	0.564269
			Student's t-test (t)	-0.426514	0.188832	2.27207	2.74962	2.89138	0.850852	2.52521	3.55758	2.45272	1.08303	3.46155	-0.342531	2.52482	2.04969	1.16128	0.813775	2.72324	0.785134	-0.044382	-1.46744	3.24069	0.835861	-0.0134784	-1.46744	2.71117	2.59614	2.77218	1.55238	1.43606	1.72838	1.85029	-0.579794	0.210212	-0.0774179	-0.272238	2.44828	1.88519	1.04643	2.04322	1.93839	2.88603	2.52521	1.79451	2.74535	2.48614	1.36568
			Student's t-test (p)	0.672994	0.851587	0.0310013	0.0103319	0.00775625	0.40207	0.0175053	0.00135858	0.020668	0.288035	0.00182381	0.73451	0.0175213	0.0498662	0.255331	0.422643	0.0110034	0.438968	0.965357	0.1534	0.0031176	0.41031	0.98947	0.1534	0.0113241	0.0148493	0.00978843	0.131802	0.16247	0.0949347	0.0748512	0.56669	0.835025	0.938842	0.787437	0.0208781	0.0698204	0.304315	0.0505441	0.0627169	0.00743216	0.0175053	0.083537	0.0104379	0.01915	0.182911
			Student's t-test (power)	0.0614355	0.0548649	0.91573	0.752453	0.999798	0.139687	0.667213	0.999084	0.635984	0.229823	0.999948	0.0576843	0.874632	0.386709	0.294658	0.200397	0.582333	0.12623	0.0501599	0.391387	0.998968	0.143963	0.050015	0.391387	0.785498	0.765633	0.798806	0.399698	0.35539	0.441618	0.324275	0.0717908	0.0533979	0.0506006	0.0547267	0.566531	0.475749	0.261152	0.660134	0.385564	0.598321	0.667213	0.525147	0.780875	0.655695	0.328464
			Wilcoxon signed-rank test (W)	110	104	153	157	164	109	152	168	151	125	162	107	152	143	129	96	155	108	96	69	165	105	96	69	157	154	158	134	124	138	141	98	112	94	95	148	139	123	146	141	152	152	143	157	150	129
			Wilcoxon signed-rank test (p)	0.681119	0.879765	0.0189741	0.0110795	0.00384283	0.713164	0.0215566	0.00194282	0.0244242	0.286493	0.00528693	0.778694	0.0215566	0.0606921	0.213911	0.879765	0.0145815	0.745709	0.879765	0.182884	0.00325844	0.845779	0.879765	0.182884	0.0110795	0.0166571	0.00961584	0.142583	0.194569	0.0995765	0.0744606	0.948316	0.61871	0.812072	0.845779	0.0349888	0.0905702	0.328176	0.0439194	0.0744606	0.0215566	0.0215566	0.0606921	0.0110795	0.0276032	0.213911
			fold change	0.920965	1.05835	2.26363	1.5579	2.15267	1.09075	1.48838	2.54332	1.4726	1.21544	2.96604	0.878782	1.42143	1.18655	1.19218	1.26231	1.21745	1.08382	0.995645	0.879333	2.66331	1.0961	0.998615	0.879333	1.5618	1.5435	1.57898	1.34296	1.34433	1.36766	1.14968	0.938579	1.02155	0.992692	0.979333	1.24971	1.26546	1.08855	1.19169	1.17926	1.24946	1.48838	1.29987	1.53745	1.48209	1.2874
			log2(fold change)	-0.118782	0.0818136	1.17864	0.639602	1.10613	0.125327	0.573743	1.34671	0.558363	0.28148	1.56854	-0.186423	0.50734	0.246774	0.2536	0.336062	0.283857	0.116127	-0.00629616	-0.185519	1.41322	0.132382	-0.00200014	-0.185519	0.643214	0.626209	0.658988	0.425418	0.426887	0.45171	0.201237	-0.0914493	0.0307663	-0.0105814	-0.0301289	0.321591	0.339666	0.122404	0.253007	0.237879	0.32131	0.573743	0.378371	0.620539	0.567635	0.36446
			robust fold change	1.16198	1.08007	2.60529	1.58484	1.62539	1.05799	1.49389	3.07105	1.45697	1.39028	3.15093	1.15515	1.35917	1.2259	1.14788	0.927579	1.14059	1.05682	0.977658	0.85228	2.56137	1.05944	0.998948	0.85228	1.499	1.44263	1.52593	1.35401	1.37199	1.39695	1.14926	1.15032	1.18933	0.976352	0.992918	1.25012	1.32327	1.06115	1.20497	1.24401	1.27986	1.49389	1.45137	1.50343	1.49391	1.36118
			log2(robust fold change)	0.216583	0.111126	1.38144	0.66434	0.700788	0.081323	0.579072	1.61873	0.542974	0.475375	1.65578	0.208079	0.442722	0.293839	0.198977	-0.108457	0.189779	0.0797285	-0.032598	-0.230601	1.35691	0.0832978	-0.00151921	-0.230601	0.584	0.528698	0.609687	0.437235	0.456271	0.482281	0.200701	0.202034	0.250155	-0.0345266	-0.0102542	0.322065	0.404105	0.0856288	0.268993	0.315002	0.355983	0.579072	0.537416	0.588259	0.579092	0.444855
			fold change - bootsrap resampling method	0.967416	1.11195	2.5136	1.60088	2.2158	1.10352	1.53467	2.74311	1.52046	1.24268	3.29445	1.0262	1.4452	1.19686	1.21728	1.29794	1.22524	1.09549	1.00837	0.881989	2.8759	1.1122	1.00906	0.885879	1.62049	1.57324	1.62326	1.38829	1.39669	1.3979	1.16134	0.950957	1.03686	1.00328	0.991136	1.25419	1.28405	1.09155	1.19918	1.1861	1.25936	1.52516	1.31733	1.56654	1.52831	1.32601
			log2(fold change) - bootstrap resampling method	-0.0477914	0.15309	1.32975	0.678865	1.14783	0.142113	0.617928	1.45581	0.604508	0.313458	1.72004	0.0373178	0.531273	0.259254	0.283664	0.376223	0.293063	0.131573	0.0120272	-0.181167	1.52401	0.15342	0.013005	-0.174818	0.696433	0.653743	0.698898	0.473307	0.482015	0.483266	0.215792	-0.0725478	0.0522191	0.00472699	-0.0128446	0.326758	0.360701	0.126382	0.262043	0.246224	0.332688	0.608963	0.397612	0.647581	0.611937	0.407096
			95% lower confidence interval	-0.765131	-0.754566	0.159804	0.16572	0.401092	-0.1484	0.0714219	0.501686	0.0954679	-0.213164	0.702988	-1.28072	0.135795	-0.0202659	-0.151097	-0.559992	0.0615719	-0.156971	-0.28434	-0.43375	0.518974	-0.142981	-0.282439	-0.444094	0.133546	0.115877	0.180231	-0.106071	-0.163402	-0.0440959	-0.025703	-0.4446	-0.313932	-0.282616	-0.268241	0.0366989	-0.0224202	-0.108517	0.0120007	-0.0499805	0.058604	0.0544665	-0.0312258	0.128849	0.0644796	-0.147413
			95% upper confidence interval	0.608674	0.927593	2.43291	1.22103	1.83602	0.481658	1.2268	2.29837	1.16928	0.827645	2.72421	1.18835	0.909959	0.576074	0.697405	1.15877	0.56081	0.464376	0.306036	0.0703762	2.44529	0.494419	0.331149	0.0628102	1.24268	1.23457	1.27894	1.07371	1.075	1.04682	0.497364	0.29248	0.379401	0.303022	0.2534	0.632694	0.753144	0.339991	0.505496	0.537261	0.608196	1.16444	0.818531	1.11738	1.15073	0.994907
		ROC Analysis	AUC	0.55	0.52	0.765	0.785	0.82	0.545	0.76	0.84	0.755	0.625	0.81	0.535	0.76	0.715	0.645	0.52	0.775	0.54	0.52	0.655	0.825	0.525	0.52	0.655	0.785	0.77	0.79	0.67	0.652632	0.69	0.705	0.51	0.56	0.53	0.525	0.74	0.695	0.615	0.73	0.705	0.76	0.76	0.715	0.785	0.75	0.645
			AUC (se)	0.111743	0.113053	0.087493	0.0837923	0.0766127	0.111996	0.0883752	0.0720704	0.0892405	0.106305	0.0787599	0.112459	0.0883752	0.0955795	0.104327	0.113053	0.0856775	0.112234	0.113053	0.103252	0.0755087	0.112869	0.113053	0.103252	0.0837923	0.0865939	0.0828228	0.101533	0.104742	0.0990359	0.0970075	0.11338	0.111197	0.112671	0.112869	0.0917376	0.0983747	0.10721	0.0933216	0.0970075	0.0883752	0.0883752	0.0955795	0.0837923	0.0900892	0.104327
			AUC(p)	0.411485	0.464758	0.0649614	0.0445058	0.0183796	0.420388	0.0706454	0.00916697	0.0765419	0.27829	0.0245336	0.43817	0.0706454	0.130354	0.243548	0.464758	0.0542629	0.429284	0.464758	0.22645	0.015696	0.455908	0.464758	0.22645	0.0445058	0.059498	0.0399967	0.201249	0.233122	0.168717	0.145343	0.482412	0.39366	0.447045	0.455908	0.0954233	0.160816	0.295866	0.108919	0.145343	0.0706454	0.0706454	0.130354	0.0445058	0.0826427	0.243548
			Sensitivity	0.75	0.55	0.7	0.7	0.8	0.5	0.6	0.7	0.6	0.45	0.65	0.85	0.7	1	0.65	0.6	0.75	0.5	0.3	0.7	0.85	0.5	0.3	0.7	0.65	0.6	0.7	0.65	0.578947	0.65	0.55	0.4	0.75	0.5	0.2	1	0.45	0.25	0.55	0.95	0.85	0.6	0.5	0.65	0.7	0.6
			Specificity	0.5	0.6	0.8	0.9	0.8	0.7	0.9	0.9	0.9	0.9	0.9	0.4	0.8	0.5	0.7	0.65	0.7	0.7	0.95	0.65	0.8	0.7	0.9	0.65	0.9	0.9	0.9	0.8	0.8	0.8	0.9	0.95	0.6	0.8	1	0.5	0.9	1	0.9	0.5	0.7	0.9	0.9	0.9	0.8	0.8
			Positive predictive value	0.75	0.733333	0.875	0.933333	0.888889	0.769231	0.923077	0.933333	0.923077	0.9	0.928571	0.73913	0.875	0.8	0.8125	0.461538	0.833333	0.769231	0.75	0.5	0.894737	0.769231	0.6	0.5	0.928571	0.923077	0.933333	0.866667	0.846154	0.866667	0.916667	0.8	0.789474	0.555556	1	0.8	0.9	1	0.916667	0.791667	0.85	0.923077	0.909091	0.928571	0.875	0.857143
			Negative predictive value	0.5	0.4	0.571429	0.6	0.666667	0.411765	0.529412	0.6	0.529412	0.45	0.5625	0.571429	0.571429	1	0.5	0.764706	0.583333	0.411765	0.730769	0.8125	0.727273	0.411765	0.72	0.8125	0.5625	0.529412	0.6	0.533333	0.5	0.533333	0.5	0.76	0.545455	0.761905	0.714286	1	0.45	0.4	0.5	0.833333	0.7	0.529412	0.473684	0.5625	0.571429	0.5
			Precision	0.75	0.733333	0.875	0.933333	0.888889	0.769231	0.923077	0.933333	0.923077	0.9	0.928571	0.73913	0.875	0.8	0.8125	0.461538	0.833333	0.769231	0.75	0.5	0.894737	0.769231	0.6	0.5	0.928571	0.923077	0.933333	0.866667	0.846154	0.866667	0.916667	0.8	0.789474	0.555556	1	0.8	0.9	1	0.916667	0.791667	0.85	0.923077	0.909091	0.928571	0.875	0.857143
			Recall	0.75	0.55	0.7	0.7	0.8	0.5	0.6	0.7	0.6	0.45	0.65	0.85	0.7	1	0.65	0.6	0.75	0.5	0.3	0.7	0.85	0.5	0.3	0.7	0.65	0.6	0.7	0.65	0.578947	0.65	0.55	0.4	0.75	0.5	0.2	1	0.45	0.25	0.55	0.95	0.85	0.6	0.5	0.65	0.7	0.6
			Youden Index	0.25	0.15	0.5	0.6	0.6	0.2	0.5	0.6	0.5	0.35	0.55	0.25	0.5	0.5	0.35	0.25	0.45	0.2	0.25	0.35	0.65	0.2	0.2	0.35	0.55	0.5	0.6	0.45	0.378947	0.45	0.45	0.35	0.35	0.3	0.2	0.5	0.35	0.25	0.45	0.45	0.55	0.5	0.4	0.55	0.5	0.4
			Cutoff	5.56321	8.48904	4.61782	63.4458	0.578861	77.504	55.4833	3.09219	47.3757	3.31087	2.85949	2.1254	4.82095	12.6035	8.98585	5.27471	333.847	76.5864	137.474	17.6247	0.351538	67.5676	111.386	17.6247	10.1965	4.97812	4.75381	3.93013	0.636059	2.55906	303.638	3.61725	5.00705	3.28024	22.1306	17.2532	11.1258	24.8722	37.9071	12.9557	126.795	55.4833	3.28229	12.1572	20.5845	7.07313
[truncated: 55 more columns]

## Sheet: Heatmap
HEATMAP
																UNTRANSFORMED DATA										SQRT TRANSFORMED DATA									UNTRANSFORMED DATA				SQRT TRANSFORMED DATA
COD.OWL	Class	Subclass A	Subclass B	Subclass C	Common name or function	Individual notation	Individual composition or probable ID	Link	Simplified name	Simple name	Orden.Heat.map				PD					Control					PD					Control					PD vs. Control				PD Vs. Control
GROUPS											0		Mean	SEM	SD	Coefficient of Variation		Mean	SEM	SD	Coefficient of Variation		Mean	SEM	SD	Coefficient of Variation		Mean	SEM	SD	Coefficient of Variation			fold change	log2(fold change)	Student's t-test (p)		fold change	log2(fold change)	Student's t-test (p)
FFA02	Non-esterified fatty acids	Saturated fatty acids			Myristic acid	14:0		HMDB00806	SFA	SFA	20002		8.19669	0.884564	3.95589	0.48262		4.4945	0.945776	2.99081	0.665437		2.78009	0.156911	0.701729	0.252412		2.0243	0.209955	0.663935	0.327983			1.82372	0.866881	0.0146406		1.37336	0.457711	0.00853655
FFA33	Non-esterified fatty acids	Saturated fatty acids			Pentadecylic acid	15:0		HMDB00826	SFA	SFA	20003		3.91008	0.953067	4.26225	1.09007		1.41302	0.323145	1.02188	0.723186		1.82464	0.174835	0.781886	0.428516		1.12574	0.127248	0.402393	0.357448			2.76718	1.46842	0.0208436		1.62083	0.696736	0.00314621
FFA03	Non-esterified fatty acids	Saturated fatty acids			Palmitic acid	16:0		HMDB00220	SFA	SFA	20004		672.14	68.1384	304.724	0.453364		418.347	118.007	373.17	0.892012		25.283	1.31612	5.88585	0.232799		18.7743	2.70543	8.55532	0.455694			1.60666	0.684063	0.0557307		1.34668	0.429411	0.0207761
FFA34	Non-esterified fatty acids	Saturated fatty acids			Margaric acid	17:0		HMDB02259	SFA	SFA	20005		7.60073	0.806061	3.60482	0.474272		4.42181	1.15663	3.65758	0.82717		2.67558	0.152528	0.682126	0.254946		1.96875	0.246263	0.778753	0.395556			1.71892	0.781503	0.031359		1.35902	0.442566	0.0163844
FFA07	Non-esterified fatty acids	Saturated fatty acids			Stearic acid	18:0		HMDB00827	SFA	SFA	20006		486.042	49.9043	223.179	0.459177		312.654	93.3125	295.08	0.943792		21.4869	1.13215	5.06313	0.235638		16.0741	2.45577	7.76582	0.483127			1.55457	0.636514	0.0824747		1.33674	0.418722	0.0288252
FFA37	Non-esterified fatty acids	Saturated fatty acids			Arachidic acid	20:0		HMDB02212	SFA	SFA	20007		21.2255	9.01293	40.3071	1.899		6.69256	2.03838	6.44592	0.963147		3.90377	0.561299	2.51021	0.643022		2.33194	0.373366	1.18069	0.506312			3.1715	1.66517	0.130814		1.67404	0.743336	0.0271497
FFA04	Non-esterified fatty acids	Monounsaturated fatty acids			Palmitoleic acid. Adipose tissue-derived molecule, which amongst other effects stimulates the action of insulin in muscle.	16:1n-7		HMDB03229	MUFA	MUFA	30003		8.01564	2.00514	8.96724	1.11872		5.18468	1.42476	4.50547	0.868996		2.53665	0.288466	1.29006	0.508568		2.1042	0.290025	0.917139	0.435861			1.54602	0.628562	0.259516		1.20552	0.269654	0.353347
FFA06	Non-esterified fatty acids	Monounsaturated fatty acids					16:1n-x		MUFA	MUFA	30005		11.2199	2.7385	12.2469	1.09154		3.8515	1.12584	3.56023	0.924374		3.02771	0.3287	1.46999	0.485512		1.81044	0.252504	0.798487	0.441047			2.91312	1.54257	0.0200029		1.67237	0.741893	0.0217026
FFA08	Non-esterified fatty acids	Monounsaturated fatty acids			Oleic acid. VLDL production is stimulated by oleic acid (18:1 n-9) and attenuated by EPA (20:5 n-3) and DHA (22:6 n-3). doi: 10.1186/1743-7075-7-35	18:1n-9		HMDB00207	MUFA	MUFA	30008		226.277	19.6134	87.7139	0.38764		175.935	30.7254	97.1623	0.552264		14.7398	0.68878	3.08032	0.208979		12.8159	1.13955	3.60356	0.281179			1.28614	0.363049	0.163608		1.15012	0.201785	0.138507
FFA09	Non-esterified fatty acids	Monounsaturated fatty acids					18:1n-x		MUFA	MUFA	30009		7.19129	1.2048	5.38802	0.749243		3.32592	0.68666	2.17141	0.652875		2.54041	0.197031	0.881147	0.346852		1.74752	0.173879	0.549852	0.314648			2.1622	1.1125	0.00956135		1.45373	0.539756	0.0150079
FFA38	Non-esterified fatty acids	Monounsaturated fatty acids			Nervonic acid	24:1n-9		HMDB02368	MUFA	MUFA	30015		2.12042	0.678265	3.03329	1.43052		0.815024	0.200823	0.635057	0.779188		1.29835	0.151257	0.67644	0.520998		0.840824	0.109564	0.346472	0.412063			2.60166	1.37943	0.0784072		1.54415	0.626809	0.0208266
FFA11	Non-esterified fatty acids	Polyunsaturated fatty acids	Essential		Linoleic acid (LA)	18:2n-6		HMDB00673	PUFA	PUFA	40006		79.3547	22.4685	100.482	1.26624		56.568	12.3043	38.9097	0.687839		8.09455	0.853259	3.81589	0.471415		7.15425	0.773499	2.44602	0.341897			1.40282	0.488329	0.381588		1.13143	0.17815	0.485619
FFA13	Non-esterified fatty acids	Polyunsaturated fatty acids			Linoelaidic acid	18:2n-6 trans		HMDB06270	PUFA	PUFA	40007		4.49593	0.821332	3.67311	0.816984		1.96041	0.5603	1.77182	0.903803		1.9819	0.172902	0.773239	0.390151		1.29788	0.175094	0.553694	0.426615			2.29336	1.19746	0.0165236		1.52703	0.610728	0.0191071
FFA20	Non-esterified fatty acids	Polyunsaturated fatty acids			Eicosatrienoid acid (ETE)	20:3n-3		HMDB60039	PUFA	PUFA	40015		5.68825	0.619977	2.77262	0.487429		4.24207	0.720735	2.27917	0.537277		2.31592	0.130743	0.584701	0.252471		2.00976	0.150169	0.474875	0.236285			1.34091	0.423216	0.165799		1.15234	0.204564	0.163037
FFA22	Non-esterified fatty acids	Polyunsaturated fatty acids			Mead acid	20:3n-9		HMDB10378	PUFA	PUFA	40016		6.5197	0.776652	3.47329	0.532738		4.3578	0.641542	2.02873	0.465541		2.47417	0.144769	0.647425	0.261674		2.04158	0.145208	0.459187	0.224918			1.4961	0.581206	0.0810133		1.21189	0.27726	0.0702591
FFA21	Non-esterified fatty acids	Polyunsaturated fatty acids					20:3n-x		PUFA	PUFA	40017		1.06015	0.178519	0.798359	0.753061		0.792664	0.111944	0.353997	0.446591		0.978132	0.0737743	0.329929	0.337305		0.860199	0.0765374	0.242032	0.281368			1.33746	0.419491	0.214807		1.1371	0.185359	0.325803
FFA23	Non-esterified fatty acids	Polyunsaturated fatty acids			Arachidonic acid (AA)	20:4n-6		HMDB01043	PUFA	PUFA	40019		321.719	32.8087	146.725	0.456066		243.089	29.4222	93.0413	0.382746		17.4483	0.953533	4.26433	0.244398		15.2639	1.05941	3.35014	0.219481			1.32346	0.404319	0.134905		1.14311	0.192962	0.168864
FFA26	Non-esterified fatty acids	Polyunsaturated fatty acids			Eicosapentaenoic acid (EPA, Timnodonic acid). VLDL production is stimulated by oleic acid (18:1 n-9) and attenuated by EPA (20:5 n-3) and DHA (22:6 n-3). doi: 10.1186/1743-7075-7-35	20:5n-3		HMDB01999	PUFA	PUFA	40022		6.56097	0.711189	3.18054	0.484766		6.13289	0.774201	2.44824	0.399198		2.49522	0.132756	0.593702	0.237936		2.43051	0.158287	0.500547	0.205943			1.0698	0.097341	0.712116		1.02662	0.037904	0.769823
FFA27	Non-esterified fatty acids	Polyunsaturated fatty acids			Adrenic acid	22:4n-6		HMDB02226	PUFA	PUFA	40027		33.9008	3.4014	15.2115	0.448707		21.6429	1.7275	5.46285	0.252408		5.68939	0.283923	1.26974	0.223177		4.60809	0.213024	0.673642	0.146187			1.56637	0.647423	0.00344964		1.23465	0.304104	0.0182419
FFA28	Non-esterified fatty acids	Polyunsaturated fatty acids			Docosapentaenoic acid (DPA, Clupanodonic acid)	22:5n-3		HMDB06528	PUFA	PUFA	40028		10.207	1.29968	5.81236	0.569448		8.3448	1.22984	3.88908	0.466049		3.07316	0.200357	0.896026	0.291565		2.82184	0.206025	0.651509	0.230881			1.22316	0.290611	0.369474		1.08906	0.123085	0.43836
FFA29	Non-esterified fatty acids	Polyunsaturated fatty acids			Docosapentaenoic acid (Osbond acid)	22:5n-6		HMDB01976	PUFA	PUFA	40029		18.4911	1.9329	8.64418	0.467479		9.74096	1.20394	3.8072	0.390845		4.18637	0.225405	1.00804	0.240791		3.06033	0.204218	0.645793	0.211021			1.89828	0.924692	0.000646491		1.36795	0.452014	0.00337307
FFA30	Non-esterified fatty acids	Polyunsaturated fatty acids	Peroxisomal beta-oxidation		Docosahexaenoic acid (DHA, Cervonic acid). DHA induces apoptosis in human hepatocellular carcinoma cells. Int J Clin Exp Pathol. 2013; 6(2): 281–289. VLDL production is stimulated by oleic acid (18:1 n-9) and attenuated by EPA (20:5 n-3) and DHA (22:6 n-3). doi: 10.1186/1743-7075-7-35	22:6n-3		HMDB02183	PUFA	PUFA	40030		184.111	18.4301	82.4217	0.447674		153.531	18.9564	59.9453	0.390446		13.2273	0.69395	3.10344	0.234624		12.1322	0.839389	2.65438	0.218789			1.19918	0.262051	0.307266		1.09027	0.124681	0.348658
AC02	Fatty esters	Acylcarnitines			L-Octanoylcarnitine	AC(8:0)		HMDB00791	AC	AC	60002		3.89088	0.685367	3.06505	0.787753		3.50882	1.3321	4.21248	1.20054		1.80196	0.184082	0.823239	0.456858		1.58257	0.334046	1.05635	0.667487			1.10889	0.149111	0.778619		1.13862	0.187292	0.53633
AC04	Fatty esters	Acylcarnitines			Decanoylcarnitine	AC(10:0)		HMDB00651	AC	AC	60005		3.14428	0.414699	1.70985	0.543796		3.09235	1.15738	3.65995	1.18355		1.71435	0.113273	0.467035	0.272427		1.47433	0.319497	1.01034	0.685286			1.01679	0.0240278	0.967039		1.1628	0.217602	0.493249
AC11	Fatty esters	Acylcarnitines			Oleoylcarnitine	AC(18:1n-9)		HMDB05065	AC	AC	60016		10.8566	1.74574	7.80719	0.719116		18.811	7.54615	23.863	1.26857		2.99796	0.313629	1.40259	0.467849		3.73718	0.733674	2.32008	0.62081			0.577143	-0.792999	0.328691		0.802198	-0.31797	0.284917
FAA04	Fatty amides	Primary amides	Fatty acid amides		Octadecanamide (Stearamide)	18:0 amide		HMDB34146	FAA	FAA	70004		0.165729	0.057303	0.256267	1.5463		0.0286332	0.0169414	0.0535735	1.87103		0.326816	0.0556872	0.249041	0.762021		0.127785	0.0369749	0.116925	0.915017			5.788	2.53307	0.0316361		2.55756	1.35477	0.00594204
FAA06	Fatty amides	Primary amides	Fatty acid amides			20:0 amide			FAA	FAA	70006		0.33583	0.123495	0.552288	1.64455		0.0472857	0.0237418	0.0750782	1.58776		0.45858	0.0812837	0.363512	0.79269		0.166004	0.0468193	0.148056	0.891882			7.10214	2.82825	0.0325107		2.76247	1.46596	0.00424496
FAA09	Fatty amides	Primary amides	Fatty acid amides				21:1n-x amide		FAA	FAA	70009		0.0881082	0.0304185	0.136036	1.54396		0.0101328	0.00461393	0.0145905	1.43993		0.238087	0.0406672	0.181869	0.763878		0.078345	0.0210684	0.0666242	0.850396			8.69531	3.12024	0.0197898		3.03896	1.60358	0.00171482
FAA10	Fatty amides	Primary amides	Fatty acid amides		Docosanamide (Behenamide)	22:0 amide		HMDB00583	FAA	FAA	70010		0.989455	0.310083	1.38673	1.40151		0.1073	0.051462	0.162737	1.51666		0.805124	0.134013	0.599325	0.744388		0.25825	0.0671705	0.212412	0.822505			9.22141	3.20499	0.010889		3.11762	1.64044	0.00114962
FAA11	Fatty amides	Primary amides	Fatty acid amides				22:2n-x amide		FAA	FAA	70011		0.880612	0.29055	1.29938	1.47554		0.0983488	0.0469536	0.14848	1.50973		0.751585	0.128909	0.576498	0.767043		0.247287	0.0642893	0.203301	0.822124			8.95397	3.16253	0.0151147		3.03932	1.60375	0.0016793
FAA13	Fatty amides	Primary amides	Fatty acid amides				23:1n-x amide		FAA	FAA	70013		0.0635829	0.0218385	0.0976648	1.53602		0.0068169	0.00318026	0.0100569	1.47528		0.19971	0.0353171	0.157943	0.790861		0.0649709	0.0169826	0.0537038	0.826582			9.32725	3.22145	0.0182778		3.07384	1.62004	0.00199226
FAA14	Fatty amides	Primary amides	Fatty acid amides				24:1n-x amide		FAA	FAA	70014		1.50799	0.528486	2.36346	1.56729		0.168169	0.0770958	0.243798	1.44973		0.972884	0.171906	0.768789	0.790216		0.322612	0.0843869	0.266855	0.82717			8.96712	3.16464	0.0209417		3.01565	1.59247	0.00220382
NAE_02	Fatty amides	N-acyl ethanolamines	N-acyl ethanolamines		Palmitoyl ethanolamide	NAE(16:0)		HMDB02100	NAE	NAE	75002		22.4648	2.70771	12.1092	0.539031		13.7404	3.13749	9.92161	0.722074		4.55389	0.301479	1.34826	0.296067		3.48624	0.419864	1.32773	0.380848			1.63494	0.709239	0.059157		1.30625	0.385427	0.0493556
NAE_04	Fatty amides	N-acyl ethanolamines	N-acyl ethanolamines		Stearoyl ethanolamide	NAE(18:0)		HMDB13078	NAE	NAE	75004		26.2661	3.3946	15.1811	0.577972		15.591	3.61127	11.4198	0.732463		4.90198	0.343108	1.53442	0.313021		3.68886	0.469435	1.48448	0.402423			1.6847	0.752492	0.0603464		1.32886	0.410191	0.0485302
NAE_05	Fatty amides	N-acyl ethanolamines	N-acyl ethanolamines		N-Oleoyl ethanolamide	NAE(18:1n-9)		HMDB02088	NAE	NAE	75005		1.61852	0.305013	1.36406	0.84278		1.69399	0.370759	1.17244	0.692119		1.18192	0.107992	0.482956	0.408619		1.23115	0.14074	0.44506	0.361501			0.95545	-0.0657478	0.882424		0.960018	-0.0588671	0.789307
MG02	Glycerolipids	Monoacylglycerols				MG(16:0/0:0/0:0)		HMDB11564	MAG	MAG	80006		0.194611	0.0829831	0.371112	1.90694		0.0250304	0.0102448	0.032397	1.29431		0.332974	0.0663876	0.296894	0.891643		0.131755	0.0291946	0.0923213	0.700703			7.77499	2.95884	0.0563739		2.52722	1.33755	0.0102892
MG04	Glycerolipids	Monoacylglycerols				MG(18:0/0:0/0:0)		HMDB11131	MAG	MAG	80008		0.384718	0.109873	0.491369	1.27722		0.0620609	0.0338176	0.106941	1.72316		0.519314	0.0778092	0.347973	0.670063		0.188256	0.054386	0.171984	0.913563			6.19905	2.63205	0.0101837		2.75855	1.46391	0.00162966
DG02	Glycerolipids	Diacylglycerols				DG(32:0)	DG(16:0+16:0+0:0)		DAG	DAG	90032		0.944144	0.286276	1.28027	1.35601		0.153604	0.0885476	0.280012	1.82295		0.816712	0.120771	0.540103	0.661313		0.294479	0.0862075	0.272612	0.925744			6.14663	2.6198	0.0148929		2.77341	1.47166	0.00150017
DG03	Glycerolipids	Diacylglycerols				DG(32:1)	DG(16:0+16:1+0:0)+ DG (14:0+18:1+0:0)		DAG	DAG	90033		0.297151	0.170714	0.763458	2.56926		0.0150464	0.00610959	0.0193202	1.28404		0.363219	0.0932522	0.417036	1.14817		0.10335	0.0220232	0.0696434	0.673859			19.7489	4.3037	0.115039		3.51445	1.8133	0.0130402
DG05	Glycerolipids	Diacylglycerols				DG(34:0)	DG(16:0+18:0+0:0)		DAG	DAG	90043		1.15778	0.32195	1.43981	1.24359		0.182418	0.10605	0.335358	1.83841		0.910378	0.131587	0.588476	0.646408		0.317495	0.0952277	0.301136	0.948475			6.34684	2.66604	0.00855618		2.86738	1.51973	0.00106734
DG06	Glycerolipids	Diacylglycerols				DG(34:1)	DG(16:0+18:1+0:0)		DAG	DAG	90044		0.592962	0.126344	0.565026	0.952888		0.160378	0.0720412	0.227814	1.42048		0.694307	0.0763991	0.341667	0.492098		0.323741	0.0785776	0.248484	0.76754			3.69727	1.88646	0.00608056		2.14464	1.10073	0.00508723
DG07	Glycerolipids	Diacylglycerols				DG(34:2)	DG(16:0+18:2+0:0)		DAG	DAG	90045		0.4142	0.271858	1.21579	2.93527		0.0267109	0.0132302	0.0418374	1.56631		0.425014	0.110873	0.495839	1.16664		0.133283	0.0315286	0.0997021	0.748046			15.5068	3.95483	0.170688		3.1888	1.67301	0.0190763
DG08	Glycerolipids	Diacylglycerols				DG(36:2)	DG(18:1+18:1+0:0)		DAG	DAG	90056		0.376864	0.147294	0.658717	1.74789		0.0495732	0.025319	0.0800658	1.6151		0.49717	0.0826171	0.369475	0.743156		0.176858	0.0450857	0.142574	0.806148			7.60217	2.92641	0.0404894		2.81113	1.49115	0.00209594
DG63	Glycerolipids	Diacylglycerols				DG(38:4)	DG(18:0+20:4+0:0)		DAG	DAG	90066		0.317541	0.1285	0.57467	1.80975		0.108381	0.0324367	0.102574	0.94642		0.47289	0.0703059	0.314417	0.664884		0.294191	0.0492526	0.15575	0.529419			2.92986	1.55083	0.129247		1.60742	0.684751	0.046628
TG121	Glycerolipids	Triacylglycerols				TG(40:0)	TG(12:0+16:0+12:0) + TG(10:0+16:0+14:0)		TAG	TAG	100038		0.036028	0.00966545	0.0432252	1.19977		0.00694449	0.00241877	0.00764883	1.10143		0.163863	0.0219771	0.0982844	0.599796		0.0740298	0.0127544	0.040333	0.54482			5.188	2.37518	0.00813053		2.21348	1.14631	0.00146966
TG04	Glycerolipids	Triacylglycerols				TG(44:0)	TG(16:0+16:0+12:0) + TG(16:0+14:0+14:0)		TAG	TAG	100057		0.161641	0.0465771	0.208299	1.28865		0.0273051	0.00538799	0.0170383	0.623998		0.344637	0.0474988	0.212421	0.616361		0.157084	0.017094	0.0540559	0.344122			5.91982	2.56555	0.00973408		2.19397	1.13355	0.0011123
TG05	Glycerolipids	Triacylglycerols				TG(44:1)	TG(14:0+18:1+12:0) + TG(16:0+16:1+12:0)		TAG	TAG	100058		0.167444	0.0461987	0.206607	1.23388		0.0373102	0.0105802	0.0334574	0.896735		0.351848	0.0479292	0.214346	0.609201		0.176104	0.0264529	0.0836513	0.475012			4.48789	2.16604	0.0121385		1.99796	0.998529	0.00340666
TG06	Glycerolipids	Triacylglycerols				TG(44:2)	TG(14:0+18:2+12:0)		TAG	TAG	100059		0.0603277	0.0173949	0.0777922	1.28949		0.0152595	0.00617256	0.0195194	1.27916		0.210435	0.0290598	0.129959	0.617575		0.108563	0.0196456	0.0621248	0.572245			3.95344	1.98311	0.0226097		1.93836	0.954836	0.0071108
TG84	Glycerolipids	Triacylglycerols				TG(45:1)	TG(14:0+15:0+16:1)		TAG	TAG	100069		0.189743	0.0640088	0.286256	1.50865		0.0270434	0.00817435	0.0258496	0.955853		0.36197	0.0555928	0.248618	0.686848		0.147697	0.0241042	0.0762243	0.516087			7.01623	2.8107	0.0204711		2.45077	1.29323	0.00161511
TG09	Glycerolipids	Triacylglycerols				TG(46:0)	TG(16:0+16:0+14:0)		TAG	TAG	100072		0.497926	0.141624	0.633362	1.272		0.0788893	0.018744	0.0592737	0.751353		0.611892	0.0806272	0.360576	0.58928		0.264426	0.0315672	0.0998241	0.377513			6.3117	2.65803	0.00832252		2.31404	1.21041	0.000507455
TG10	Glycerolipids	Triacylglycerols				TG(46:1)	TG(12:0+18:1+16:0)		TAG	TAG	100073		0.569135	0.154567	0.691245	1.21455		0.127798	0.028857	0.0912538	0.714049		0.652309	0.0869445	0.388828	0.596079		0.335231	0.0413893	0.130885	0.390431			4.45341	2.15491	0.0107919		1.94585	0.960399	0.00287905
TG11	Glycerolipids	Triacylglycerols				TG(46:2)	TG(14:0+18:2+14:0) + TG(16:1+18:1+12:0)		TAG	TAG	100074		0.295484	0.0774894	0.346543	1.1728		0.072183	0.0178966	0.0565939	0.784033		0.472993	0.0614568	0.274843	0.581072		0.248033	0.0344203	0.108847	0.43884			4.09355	2.03335	0.0105575		1.90698	0.93129	0.00354056
TG13_TG14	Glycerolipids	Triacylglycerols				TG(47:0)	TG(16:0+16:0+15:0)		TAG	TAG	100085		0.300023	0.0973807	0.4355	1.45155		0.0439358	0.0139273	0.0440419	1.00241		0.460613	0.0680011	0.30411	0.660228		0.191544	0.0283761	0.0897332	0.468474			6.82867	2.7716	0.017108		2.40474	1.26588	0.00122669
TG15	Glycerolipids	Triacylglycerols				TG(47:1)	TG(18:1+14:0+15:0) + TG(16:1+17:0+14:0)		TAG	TAG	100086		0.345646	0.111153	0.497091	1.43815		0.0555291	0.0134268	0.0424591	0.764629		0.498892	0.0713599	0.319131	0.63968		0.219981	0.0281614	0.089054	0.404826			6.22459	2.63798	0.0176565		2.26789	1.18135	0.00130639
TG152	Glycerolipids	Triacylglycerols				TG(47:2)	TG(12:0+18:2+17:0) + TG(12:0+18:1+17:1) + TG(14:0+18:2+15:0)		TAG	TAG	100087		0.230555	0.076476	0.342011	1.48343		0.0352554	0.0106744	0.0337555	0.957455		0.401836	0.0602985	0.269663	0.671077		0.169478	0.0269415	0.0851964	0.502699			6.53955	2.70919	0.020074		2.37102	1.24551	0.00167099
TG16	Glycerolipids	Triacylglycerols				TG(48:0)	TG(16:0/16:0/16:0)	HMDB05356	TAG	TAG	100089		0.716542	0.188051	0.84099	1.17368		0.125898	0.0293614	0.092849	0.737496		0.747191	0.0912624	0.408138	0.54623		0.336468	0.0375448	0.118727	0.352863			5.69147	2.5088	0.00562369		2.22069	1.15101	0.000337817
TG17	Glycerolipids	Triacylglycerols				TG(48:1)	TG(14:0+18:1+16:0) + TG(16:0+16:1+16:0)		TAG	TAG	100090		1.54001	0.457112	2.04427	1.32744		0.349234	0.0799885	0.252946	0.724287		1.07024	0.144111	0.644484	0.602185		0.559555	0.0633612	0.200366	0.35808			4.40968	2.14067	0.0183679		1.91266	0.935584	0.00332689
TG18	Glycerolipids	Triacylglycerols				TG(48:2)	TG(14:0+18:1+16:1) + TG(16:0+18:2+14:0)		TAG	TAG	100091		0.956283	0.265457	1.18716	1.24143		0.260364	0.0625947	0.197942	0.760248		0.845334	0.112786	0.504395	0.596682		0.476735	0.0606337	0.191741	0.402195			3.67286	1.8769	0.0185645		1.77317	0.826332	0.00774805
TG19	Glycerolipids	Triacylglycerols				TG(48:3)	TG(18:1+18:2+12:0)		TAG	TAG	100092		0.299074	0.0794181	0.355168	1.18756		0.0807555	0.0197513	0.0624589	0.773433		0.477211	0.0612771	0.27404	0.574252		0.264115	0.034958	0.110547	0.418556			3.70345	1.88887	0.0143134		1.80683	0.853461	0.00542647
TG22	Glycerolipids	Triacylglycerols				TG(49:0)	TG(16:0+17:0+16:0) + TG(18:0+17:0+14:0)		TAG	TAG	100100		0.188952	0.0570936	0.25533	1.3513		0.0272772	0.00756183	0.0239126	0.876653		0.37099	0.0519709	0.232421	0.626488		0.153955	0.0199303	0.0630253	0.409374			6.92712	2.79225	0.0110005		2.40973	1.26887	0.000683234
TG23	Glycerolipids	Triacylglycerols				TG(49:1)	TG(15:0+18:1+16:0)		TAG	TAG	100101		0.408492	0.103848	0.46442	1.13692		0.093489	0.016591	0.0524653	0.561192		0.564045	0.0689563	0.308382	0.546733		0.292673	0.0294983	0.0932817	0.318723			4.36941	2.12744	0.00716288		1.92722	0.94652	0.00132091
TG24	Glycerolipids	Triacylglycerols				TG(49:2)	TG(15:0+18:2+16:0) + TG(18:1+16:1+15:0) + TG(18:1+14:0+17:1) + TG(16:0+18:2+15:0)		TAG	TAG	100102		0.349583	0.108882	0.486935	1.3929		0.0715308	0.0130702	0.0413317	0.577817		0.508516	0.0692041	0.30949	0.608615		0.255319	0.026548	0.0839522	0.328813			4.88717	2.289	0.0198968		1.99169	0.993994	0.00227516
TG25	Glycerolipids	Triacylglycerols				TG(49:3)	TG(17:1+16:1+16:1) + TG(18:2+15:0+16:1)		TAG	TAG	100103		0.10277	0.0395333	0.176798	1.72033		0.0181644	0.00383025	0.0121123	0.666815		0.263722	0.0418144	0.187	0.709078		0.127074	0.0149691	0.0473364	0.372511			5.65774	2.50023	0.0461993		2.07534	1.05335	0.00526955
TG26	Glycerolipids	Triacylglycerols				TG(50:0)	TG(16:0+16:0+18:0)		TAG	TAG	100105		0.392726	0.104855	0.468926	1.19403		0.0713246	0.0174545	0.0551958	0.773868		0.552941	0.0676611	0.30259	0.547237		0.254091	0.0274114	0.0866824	0.341147			5.50618	2.46105	0.00670044		2.17615	1.12178	0.000405773
TG27	Glycerolipids	Triacylglycerols				TG(50:1)	TG(16:0+18:1+16:0)		TAG	TAG	100106		3.24067	0.876926	3.92173	1.21016		0.851933	0.173658	0.549153	0.644597		1.58384	0.196299	0.877878	0.554273		0.879661	0.0931728	0.294638	0.334945			3.80391	1.92748	0.0144667		1.80051	0.848404	0.00328025
TG28	Glycerolipids	Triacylglycerols				TG(50:2)	TG(16:0+18:1+16:1) + TG(18:1+18:1+14:0) + TG(16:0+18:2+16:0)		TAG	TAG	100107		3.21567	1.02028	4.56285	1.41894		0.945789	0.226778	0.717134	0.758239		1.54347	0.20943	0.936599	0.606812		0.91406	0.110696	0.350053	0.382965			3.39998	1.76553	0.041582		1.68859	0.75582	0.01314
TG29	Glycerolipids	Triacylglycerols				TG(50:3)	TG(16:1+18:1+16:1) + TG(16:0+18:2+16:1)		TAG	TAG	100108		0.902354	0.227956	1.01945	1.12977		0.36781	0.0927264	0.293227	0.797224		0.838963	0.102211	0.457102	0.544842		0.562543	0.0755387	0.238874	0.424633			2.45332	1.29473	0.0397824		1.49138	0.576643	0.0853335
TG30	Glycerolipids	Triacylglycerols				TG(50:4)	TG(16:1+18:2+16:1) + TG(16:1+18:3+16:0) + TG(18:1+18:3+14:0) + TG(14:0+18.4+18:0)		TAG	TAG	100109		0.169731	0.0429701	0.192168	1.13219		0.0673884	0.0174962	0.0553279	0.821029		0.364749	0.0439432	0.19652	0.538782		0.239324	0.0335198	0.105999	0.442909			2.51869	1.33267	0.0370446		1.52408	0.607934	0.0712004
TG33	Glycerolipids	Triacylglycerols				TG(51:1)	TG(16:0+17:0+18:1)		TAG	TAG	100114		0.250682	0.0567498	0.253793	1.01241		0.0689922	0.0136211	0.0430737	0.624327		0.444375	0.0529214	0.236672	0.532595		0.249913	0.0269478	0.0852165	0.340984			3.63348	1.86135	0.00523957		1.77812	0.83035	0.00295731
TG34	Glycerolipids	Triacylglycerols				TG(51:2)	TG(16:0+17:1+18:1)		TAG	TAG	100115		0.409965	0.0894664	0.400106	0.975952		0.13053	0.0261484	0.0826885	0.633484		0.57204	0.0659887	0.29511	0.515892		0.342324	0.0385051	0.121764	0.355698			3.14078	1.65112	0.00661657		1.67105	0.740752	0.0055964
TG35	Glycerolipids	Triacylglycerols				TG(51:3)	TG(16:0+17:1+18:2) + TG(18:2+18:1+15:0)		TAG	TAG	100116		0.173309	0.0435678	0.194841	1.12424		0.0586428	0.0116054	0.0366995	0.625815		0.369409	0.0440375	0.196942	0.533127		0.2293	0.0259574	0.0820845	0.357978			2.95534	1.56333	0.0186938		1.61102	0.687978	0.0106422
TG38	Glycerolipids	Triacylglycerols				TG(52:1)	TG(16:0+18:1+18:0)		TAG	TAG	100119		1.34533	0.394626	1.76482	1.31181		0.344406	0.0814794	0.25766	0.748129		0.98737	0.13963	0.624443	0.632431		0.553784	0.0647474	0.204749	0.369728			3.90624	1.96578	0.0216988		1.78295	0.834269	0.00921603
TG39	Glycerolipids	Triacylglycerols				TG(52:2)	TG(16:0+18:1+18:1)		TAG	TAG	100120		10.8447	3.06146	13.6912	1.26249		2.81852	0.607732	1.92182	0.681853		2.88202	0.365531	1.6347	0.567208		1.58171	0.187588	0.593205	0.375039			3.84764	1.94398	0.0180137		1.82209	0.86559	0.00387942
TG40	Glycerolipids	Triacylglycerols				TG(52:3)	TG(16:0+18:1+18:2)		TAG	TAG	100121		5.27229	1.5689	7.01635	1.3308		1.88807	0.45485	1.43836	0.761815		2.02482	0.248402	1.11089	0.548635		1.27944	0.167034	0.528206	0.412841			2.79241	1.48151	0.0502156		1.58258	0.662282	0.0189804
TG41	Glycerolipids	Triacylglycerols				TG(52:4)	TG(16:0+18:2+18:2)		TAG	TAG	100122		1.18798	0.261335	1.16873	0.983791		0.582363	0.155405	0.491435	0.843864		0.987644	0.105766	0.472998	0.478916		0.702133	0.0996504	0.315122	0.448807			2.03994	1.02852	0.0563888		1.40663	0.492247	0.0965018
TG42	Glycerolipids	Triacylglycerols				TG(52:5)	TG(16:0+18:2+18:3)		TAG	TAG	100123		0.244045	0.0529942	0.236997	0.971118		0.101345	0.0226586	0.0716527	0.70702		0.446355	0.048565	0.217189	0.486585		0.297362	0.0378899	0.119818	0.402938			2.40807	1.26788	0.0204669		1.50105	0.585973	0.0541318
TG43	Glycerolipids	Triacylglycerols				TG(53:0)	TG(17:0+18:0+18:0) + TG(20:0+17:0+16:0)		TAG	TAG	100130		0.0914799	0.0341452	0.152702	1.66924		0.0120523	0.00549544	0.0173781	1.44189		0.245746	0.0404506	0.180901	0.736128		0.0909982	0.0204712	0.0647355	0.711393			7.59025	2.92415	0.0325929		2.70056	1.43326	0.00208729
TG44	Glycerolipids	Triacylglycerols				TG(53:1)	TG(18:0+18:1+17:0)		TAG	TAG	100131		0.0853446	0.0206929	0.0925413	1.08433		0.0180607	0.0029285	0.00926072	0.512756		0.259396	0.0308293	0.137873	0.531515		0.129274	0.0122421	0.0387129	0.299463			4.72544	2.24045	0.00435078		2.00655	1.00472	0.000632933
TG45	Glycerolipids	Triacylglycerols				TG(53:2)	TG(18:1+18:1+17:0)		TAG	TAG	100132		0.249367	0.0619483	0.277041	1.11098		0.0869507	0.0183093	0.0578991	0.665884		0.441183	0.0536676	0.240009	0.544012		0.27769	0.033064	0.104558	0.376527			2.86791	1.52	0.0196994		1.58876	0.667905	0.0149925
TG83	Glycerolipids	Triacylglycerols				TG(53:4)	TG(18:2+17:1+18:1)		TAG	TAG	100134		0.0464684	0.0103059	0.0460896	0.991848		0.0214892	0.00513974	0.0162533	0.756346		0.193547	0.0217739	0.0973758	0.503111		0.135528	0.0186234	0.0588923	0.434541			2.16241	1.11264	0.0393382		1.4281	0.514097	0.0957016
TG48	Glycerolipids	Triacylglycerols				TG(54:1)	TG(18:0+18:1+18:0)		TAG	TAG	100138		0.322949	0.107026	0.478635	1.48208		0.0569996	0.0111903	0.0353869	0.620827		0.473657	0.0720373	0.322161	0.680157		0.228386	0.0231882	0.0733276	0.321068			5.66581	2.50228	0.0228655		2.07393	1.05237	0.00365862
TG49	Glycerolipids	Triacylglycerols				TG(54:2)	TG(18:0+18:1+18:1)		TAG	TAG	100139		2.32525	0.785575	3.5132	1.51089		0.52789	0.128452	0.406199	0.769478		1.26123	0.196625	0.879332	0.697204		0.682342	0.083199	0.263098	0.385581			4.40481	2.13908	0.0352814		1.84838	0.886259	0.0120017
TG50	Glycerolipids	Triacylglycerols				TG(54:3)	TG(20:2+20:1+14:0) + TG(20:2+18:1+16:0) + TG(20:1+18:2+16:0) + TG(18:2+18:1+18:0)		TAG	TAG	100140		8.97254	3.47397	15.5361	1.73151		1.54346	0.368902	1.16657	0.755815		2.42219	0.404288	1.80803	0.746444		1.16251	0.14607	0.461914	0.397342			5.81326	2.53935	0.0464824		2.08359	1.05907	0.00742835
TG51	Glycerolipids	Triacylglycerols				TG(54:4)	TG(18:2+18:1+18:1) + TG(18:2+18:2+18:0)		TAG	TAG	100141		3.04073	1.09355	4.8905	1.60833		0.764692	0.193964	0.613368	0.802112		1.44992	0.222244	0.993904	0.685487		0.812141	0.108073	0.341757	0.42081			3.97642	1.99147	0.0536581		1.78531	0.836174	0.0158586
TG53	Glycerolipids	Triacylglycerols				TG(54:5)	TG(18:1+20:4+16:0)		TAG	TAG	100143		0.195257	0.0241045	0.107799	0.552087		0.101318	0.0200166	0.0632979	0.624743		0.427175	0.0259336	0.115979	0.271502		0.303905	0.031552	0.0997762	0.328313			1.92716	0.946476	0.0172165		1.40562	0.491203	0.00779143
TG54	Glycerolipids	Triacylglycerols				TG(54:6)	TG(18:2+18:3+18:1)		TAG	TAG	100144		0.149368	0.0453007	0.197461	1.32198		0.0360315	0.0109383	0.032815	0.91073		0.324021	0.0496534	0.216434	0.667965		0.171545	0.0287313	0.086194	0.502458			4.14547	2.05154	0.0245327		1.88884	0.917501	0.01336
TG173	Glycerolipids	Triacylglycerols				TG(55:2)	TG(18:1+18:1+19:0) + TG(18:0+18:1+19:1)		TAG	TAG	100150		0.0493887	0.0125576	0.0561591	1.13709		0.0120455	0.0021753	0.00687891	0.571075		0.194296	0.0247491	0.110682	0.569656		0.105201	0.0104256	0.0329685	0.313385			4.10016	2.03568	0.00824276		1.84689	0.885101	0.00281185
TG58	Glycerolipids	Triacylglycerols				TG(56:0)	TG(20:0+18:0+18:0) + TG(22:0+20:0+14:0)		TAG	TAG	100154		0.071488	0.0289655	0.129537	1.81202		0.00713968	0.00245247	0.0077554	1.08624		0.212644	0.037184	0.166292	0.78202		0.0725431	0.0144421	0.0456701	0.629558			10.0128	3.32377	0.0391029		2.93128	1.55153	0.00178682
TG59	Glycerolipids	Triacylglycerols				TG(56:1)	TG(22:0+18:1+16:0) + TG(24:0+16:1+16:0)		TAG	TAG	100155		0.0940539	0.0350617	0.156801	1.66714		0.0111458	0.00294424	0.00931049	0.835337		0.253663	0.0395426	0.17684	0.697144		0.0979651	0.0131175	0.0414813	0.423429			8.43852	3.07699	0.0291843		2.58932	1.37258	0.00108839
TG60	Glycerolipids	Triacylglycerols				TG(56:2)	TG(18:1+20:1+18:0)		TAG	TAG	100156		0.206237	0.0636889	0.284825	1.38106		0.0369171	0.00712263	0.0225237	0.610117		0.379417	0.0572526	0.256042	0.674829		0.183585	0.0188964	0.0597556	0.325493			5.58648	2.48194	0.0158589		2.06671	1.04734	0.00357374
TG61	Glycerolipids	Triacylglycerols				TG(56:3)	TG(18:1+20:1+18:1)		TAG	TAG	100157		0.341742	0.129585	0.579521	1.69579		0.0836733	0.0206578	0.0653256	0.780722		0.481451	0.0760701	0.340196	0.706605		0.271027	0.0336941	0.10655	0.393134			4.08424	2.03007	0.0632876		1.77639	0.828952	0.0180722
TG63	Glycerolipids	Triacylglycerols				TG(56:5)	TG(20:4+18:1+18:0)		TAG	TAG	100160		0.0748365	0.0117177	0.0524031	0.700235		0.0464034	0.0133982	0.0423688	0.913053		0.260377	0.0192492	0.0860852	0.330617		0.195066	0.0304645	0.0963372	0.49387			1.61274	0.68951	0.148429		1.33482	0.416643	0.0699886
TG64	Glycerolipids	Triacylglycerols				TG(56:6)	TG(22:5+18:1+16:0) + TG(20:4+18:1+18:1)		TAG	TAG	100162		0.276937	0.0388288	0.173648	0.62703		0.157109	0.0306489	0.0969202	0.616897		0.502857	0.0355936	0.15918	0.31655		0.377166	0.0406269	0.128473	0.340628			1.7627	0.817789	0.0531447		1.33325	0.414949	0.0391799
TG65	Glycerolipids	Triacylglycerols				TG(56:7)	TG(22:5+18:2+16:0) + TG(20:4+18:2+18:1)		TAG	TAG	100163		0.0364091	0.00603049	0.0269692	0.740726		0.0239817	0.00586362	0.0185424	0.77319		0.178511	0.0154627	0.0691512	0.387377		0.143453	0.0194446	0.0614892	0.428635			1.5182	0.602366	0.202331		1.24439	0.315435	0.186123
TG66	Glycerolipids	Triacylglycerols				TG(56:7)	TG(22:6+18:1+16:0)		TAG	TAG	100164		0.0929577	0.0164105	0.0733901	0.7895		0.0686679	0.0185418	0.0586342	0.85388		0.283134	0.0259482	0.116044	0.409855		0.239273	0.0356159	0.112627	0.470707			1.35373	0.436938	0.371093		1.18331	0.242828	0.332991
TG69	Glycerolipids	Triacylglycerols				TG(58:1)	TG(24:0+18:1+16:0)		TAG	TAG	100168		0.065909	0.0312334	0.13968	2.11929		0.0072172	0.00220436	0.00697081	0.965861		0.202636	0.0361631	0.161726	0.798112		0.0761947	0.0125236	0.0396031	0.519761			9.13221	3.19096	0.0761722		2.65945	1.41113	0.00308509
TG70	Glycerolipids	Triacylglycerols				TG(58:2)	TG(18:1+22:0+18:1)		TAG	TAG	100169		0.0984677	0.03585	0.160326	1.62821		0.0103082	0.00181105	0.00572705	0.555582		0.254055	0.0422546	0.188968	0.743807		0.0977677	0.0091267	0.0288612	0.295201			9.55236	3.25586	0.0237938		2.59856	1.37771	0.00165085
TG71	Glycerolipids	Triacylglycerols				TG(58:3)	TG(22:1+18:1+18:1) + TG(22:1+18:2+18:0)		TAG	TAG	100170		0.0523272	0.0195476	0.0874196	1.67064		0.0111933	0.00235198	0.00743763	0.66447		0.186536	0.0303761	0.135846	0.728258		0.0999921	0.0115225	0.0364372	0.364401			4.67486	2.22492	0.0499859		1.86551	0.899568	0.0136334
TG74	Glycerolipids	Triacylglycerols				TG(58:7)	TG(22:5+18:2+18:0) + TG(22:4+18:2+18:1) + TG(22:5+18:1+18:1)		TAG	TAG	100174		0.041688	0.0102549	0.0422821	1.01425		0.0235195	0.0062601	0.0197962	0.841692		0.185375	0.0213951	0.0882141	0.475867		0.141094	0.0200332	0.0633507	0.448996			1.77249	0.825775	0.143446		1.31384	0.393793	0.177928
TG76	Glycerolipids	Triacylglycerols				TG(58:9)	TG(20:4+20:4+18:1) + TG(22:6+18:1+18:2)		TAG	TAG	100177		0.0563304	0.00754356	0.0320046	0.568159		0.0257106	0.00598375	0.0189223	0.73597		0.22879	0.0153118	0.0649625	0.28394		0.15344	0.0155167	0.0490681	0.319787			2.19094	1.13155	0.0105567		1.49107	0.57635	0.0037176
ChoE_07	Sterols	Cholesteryl Ester				ChoE(18:1)		HMDB00918	ChoE	ChoE	120008		0.0725794	0.0282413	0.126299	1.74015		0.0112448	0.00449456	0.0142131	1.26397		0.21709	0.0365997	0.163679	0.753967		0.0880933	0.0196761	0.0622213	0.706312			6.45449	2.6903	0.044466		2.46432	1.30119	0.00446065
ChoE_08	Sterols	Cholesteryl Ester				ChoE(18:2)		HMDB00610	ChoE	ChoE	120009		0.16105	0.0759343	0.339589	2.1086		0.0282556	0.00854505	0.0270218	0.956335		0.310933	0.0582058	0.260304	0.837171		0.150333	0.0250681	0.0792722	0.527312			5.69975	2.5109	0.0980262		2.0683	1.04845	0.0179422
ChoE_12	Sterols	Cholesteryl Ester				ChoE(20:4)		HMDB06726	ChoE	ChoE	120013		0.0651168	0.0228688	0.102273	1.5706		0.0147819	0.00365764	0.0115665	0.782473		0.215004	0.0315311	0.141011	0.655854		0.109801	0.0174027	0.0550323	0.5012			4.40516	2.13919	0.0419632		1.95813	0.969474	0.00695902
ChoE_17	Sterols	Cholesteryl Ester				ChoE(22:6)		HMDB06733	ChoE	ChoE	120017		0.0759579	0.033931	0.151744	1.99774		0.0115469	0.00293435	0.00927922	0.803611		0.21886	0.0384284	0.171857	0.785237		0.0986083	0.0142334	0.0450099	0.456451			6.5782	2.71769	0.0737131		2.21949	1.15023	0.00732015
BA03	Bile acids	Primary bile acids			CA (31% bile)	Cholic acid		HMDB00619	BA	BA	130001		4.0365	1.40079	6.26452	1.55197		8.57311	5.90222	18.6645	2.17709		1.57523	0.286095	1.27945	0.812234		1.9833	0.717994	2.2705	1.14481			0.470833	-1.08671	0.471723		0.794248	-0.332338	0.60719
BA05	Bile acids	Primary bile acids			CDCA (45% bile)	Chenodeoxycholic acid		HMDB00518	BA	BA	130003		7.16716	4.04687	18.0982	2.52515		11.2623	7.49057	23.6873	2.10324		1.97131	0.415558	1.85843	0.942738		2.33597	0.803154	2.53979	1.08725			0.636387	-0.652024	0.602372		0.843895	-0.244865	0.657602
BA06_BA07	Bile acids				UDCA + HDCA	Ursodeoxycholic + Hyodeoxycholic acid		HMDB00946	BA	BA	130007		5.85223	3.2145	13.638	2.33039		6.74995	5.38076	16.1423	2.39147		1.74474	0.406427	1.72432	0.988298		1.67039	0.703541	2.11062	1.26355			0.867004	-0.20589	0.880569		1.04451	0.0628312	0.92264
BA16H	Bile acids	Glycine-conjugated bile acids			GCDCA	Glycochenodeoxycholic acid		HMDB00637	BA	BA	130009		9.21942	5.12305	22.911	2.48508		4.33961	1.25431	3.96646	0.914014		2.16081	0.489378	2.18857	1.01285		1.86479	0.309512	0.978764	0.524867			2.12448	1.08711	0.365284		1.15874	0.21256	0.613225
BA15	Bile acids	Glycine-conjugated bile acids			GCA	Glycocholic acid		HMDB00138	BA	BA	130010		8.68388	4.06779	18.1917	2.09488		3.74753	1.13308	3.5831	0.956124		2.21317	0.446374	1.99625	0.901983		1.73304	0.287536	0.909268	0.524666			2.31723	1.2124	0.255028		1.27704	0.352809	0.373602
BA18	Bile acids	Glycine-conjugated bile acids			GDCA	Glycodeoxycholic acid		HMDB00631	BA	BA	130011		9.61149	4.43783	19.8466	2.06488		4.56931	1.84018	5.52053	1.20818		2.09691	0.523876	2.34284	1.11729		1.69824	0.458981	1.37694	0.810807			2.10349	1.07278	0.304226		1.23476	0.304226	0.640577
ST08	Sterols	Steroid sulfates				androsterone sulfate + etiocholanolone sulfate		HMDB02759	ST	ST	150001		11.053	2.50804	11.2163	1.01477		3.31764	1.45217	4.59216	1.38416		2.9743	0.340783	1.52403	0.512398		1.56609	0.310017	0.980358	0.62599			3.33158	1.73621	0.0126337		1.89919	0.925381	0.0131408
ST02	Sterols	Steroid sulfates			DHEAS	Dehydroepiandrosterone sulfate (DHEAS)		HMDB01032	ST	ST	150002		17.3011	3.50356	15.6684	0.905631		4.35251	1.42676	4.5118	1.0366		3.78259	0.396904	1.77501	0.469257		1.86998	0.308343	0.975065	0.52143			3.97497	1.99094	0.00219178		2.02279	1.01635	0.0037751
ST01	Sterols	Steroids				Cortisol (hydrocortisone)		HMDB00063	ST	ST	150007		267.177	46.0017	205.726	0.769997		155.668	67.6025	213.778	1.37329		15.211	1.37271	6.13894	0.403585		10.1858	2.40181	7.5952	0.745667			1.71632	0.779322	0.17793		1.49336	0.578561	0.060816
DAPE02	Glycerophospholipids	Diacylglycerophosphoethanolamine				PE(16:0/18:1)		HMDB08927	PE_DAPE	PE	160003		0.681489	0.236227	1.05644	1.55019		0.33435	0.0884778	0.279791	0.836822		0.706053	0.0981347	0.438872	0.621585		0.529648	0.0773327	0.244547	0.461717			2.03825	1.02733	0.181629		1.33306	0.414742	0.249363
DAPE08	Glycerophospholipids	Diacylglycerophosphoethanolamine				PE(16:0/20:4)		HMDB08937	PE_DAPE	PE	160008		0.320064	0.0636523	0.277454	0.86687		0.176378	0.0397833	0.125806	0.713273		0.517873	0.0536824	0.233996	0.451841		0.392621	0.0496954	0.157151	0.400261			1.81465	0.859691	0.0663774		1.31901	0.399459	0.141195
DAPE07	Glycerophospholipids	Diacylglycerophosphoethanolamine				PE(18:1/18:2)		HMDB09060	PE_DAPE	PE	160009		0.0802767	0.0148418	0.0663744	0.82682		0.0476481	0.0125623	0.0397254	0.833727		0.265422	0.0227434	0.101711	0.383207		0.200346	0.0288855	0.0913441	0.455931			1.68478	0.752563	0.165297		1.32481	0.40579	0.0991051
DAPE21	Glycerophospholipids	Diacylglycerophosphoethanolamine				PE(16:0/22:6)		HMDB08946	PE_DAPE	PE	160015		0.291226	0.0525302	0.234922	0.806667		0.221713	0.056768	0.179516	0.809676		0.494954	0.049336	0.220637	0.445773		0.43288	0.0617594	0.1953	0.451165			1.31352	0.393442	0.418662		1.1434	0.193325	0.457687
DAPE18	Glycerophospholipids	Diacylglycerophosphoethanolamine				PE(18:0/20:4)		HMDB09003	PE_DAPE	PE	160016		1.13572	0.183956	0.78046	0.687194		0.781303	0.202453	0.640214	0.819419		1.0011	0.0886249	0.376003	0.375591		0.797062	0.127364	0.402762	0.505308			1.45362	0.539653	0.232417		1.25598	0.328818	0.191187
MEMAPE12	Glycerophospholipids	1-ether, 2-acylglycerophosphoethanolamine				PE(18:1e/22:4)			PE_1ME2MAPE	PE	170209		0.202607	0.0494037	0.215346	1.06288		0.103369	0.0289083	0.091416	0.884362		0.403808	0.0468719	0.20431	0.505957		0.283591	0.0504929	0.159673	0.563039			1.96002	0.970871	0.0946914		1.42391	0.50986	0.118051
MEMAPE30	Glycerophospholipids	1-ether, 2-acylglycerophosphoethanolamine				PE(18:2e/22:6)			PE_1ME2MAPE	PE	170213		0.142847	0.0296975	0.129448	0.906202		0.0795922	0.0205223	0.0648972	0.815371		0.346014	0.0358403	0.156224	0.451497		0.25631	0.0392953	0.124263	0.484813			1.79474	0.843775	0.0910808		1.34998	0.432938	0.128313
MEMAPE01	Glycerophospholipids	1-ether, 2-acylglycerophosphoethanolamine				PE(O-16:0/18:1)			PE_1ME2MAPE	PE	170401		0.651065	0.157552	0.686753	1.05482		0.371041	0.113735	0.35966	0.969328		0.730181	0.0809323	0.352776	0.483135		0.543156	0.091907	0.290635	0.535086			1.7547	0.811223	0.241059		1.34433	0.426887	0.16247
MEMAPE02	Glycerophospholipids	1-ether, 2-acylglycerophosphoethanolamine			Plasmalogen	PE(P-16:0/18:2)			PE_1ME2MAPE	PE	170403		0.0870818	0.0171017	0.0725563	0.833197		0.0498071	0.0174649	0.0552289	1.10886		0.271886	0.0278227	0.118042	0.434158		0.194347	0.0365702	0.115645	0.595045			1.74838	0.806021	0.170634		1.39897	0.48437	0.105485
MEMAPE11	Glycerophospholipids	1-ether, 2-acylglycerophosphoethanolamine			Plasmalogen	PE(P-16:0/22:6)			PE_1ME2MAPE	PE	170407		0.415305	0.0844715	0.377768	0.909616		0.223468	0.0553003	0.174875	0.782552		0.59239	0.0582096	0.260321	0.439443		0.431941	0.0640265	0.20247	0.468744			1.85846	0.894105	0.0677886		1.37146	0.455713	0.0996028
MEMAPE08	Glycerophospholipids	1-ether, 2-acylglycerophosphoethanolamine			Plasmalogen	PE(P-18:0/20:4)			PE_1ME2MAPE	PE	170408		1.20768	0.223903	1.00133	0.829133		0.648662	0.179215	0.566726	0.873686		1.01432	0.0970198	0.433886	0.427762		0.728939	0.114169	0.361033	0.495285			1.8618	0.8967	0.114188		1.3915	0.476637	0.0844424
MEMAPE09	Glycerophospholipids	1-ether, 2-acylglycerophosphoethanolamine			Plasmalogen	PE(P-18:1/20:4)			PE_1ME2MAPE	PE	170409		0.809137	0.137053	0.612919	0.757497		0.481555	0.162632	0.514287	1.06797		0.834345	0.077121	0.344896	0.413373		0.608528	0.11118	0.351581	0.577757			1.68026	0.748685	0.157974		1.37109	0.455321	0.104083
MAPE08	Glycerophospholipids	1-Monoacylglycerophosphoethanolamine				PE(16:0/0:0)		HMDB11503	LPE_1MAPE	LPE	180002		45.567	6.81391	30.4727	0.668746		50.298	9.84732	31.1399	0.61911		6.48099	0.433087	1.93683	0.298847		6.80247	0.668693	2.11459	0.310856			0.905941	-0.142511	0.693619		0.952741	-0.0698445	0.680636
MAPE14	Glycerophospholipids	1-Monoacylglycerophosphoethanolamine				PE(18:0/0:0)		HMDB11130	LPE_1MAPE	LPE	180005		115.129	16.6582	74.4976	0.647081		143.414	21.1914	67.013	0.46727		10.2468	0.730275	3.26589	0.318724		11.6002	0.991615	3.13576	0.27032			0.802771	-0.316939	0.32027		0.883327	-0.178981	0.28774
MAPE16	Glycerophospholipids	1-Monoacylglycerophosphoethanolamine				PE(18:1/0:0)			LPE_1MAPE	LPE	180006		74.3459	7.42658	33.2127	0.446732		83.4124	19.299	61.0288	0.731651		8.42618	0.419612	1.87656	0.222706		8.59754	1.02712	3.24804	0.377787			0.891305	-0.166008	0.669021		0.980069	-0.0290446	0.879809
MAPE29	Glycerophospholipids	1-Monoacylglycerophosphoethanolamine				PE(20:3/0:0)		HMDB11515	LPE_1MAPE	LPE	180012		2.65323	0.272488	1.2186	0.459291		3.43022	1.12574	3.5599	1.03781		1.58687	0.0843124	0.377057	0.23761		1.67397	0.264164	0.83536	0.499029			0.773486	-0.370552	0.517418		0.947969	-0.0770875	0.759389
MAPE31	Glycerophospholipids	1-Monoacylglycerophosphoethanolamine				PE(20:4/0:0)		HMDB11517	LPE_1MAPE	LPE	180013		119.258	13.9666	62.4606	0.523742		91.6154	18.5371	58.6195	0.639844		10.5691	0.630471	2.81955	0.266773		8.98181	1.10265	3.48687	0.388215			1.30173	0.380428	0.253752		1.17672	0.234774	0.189828
MAPE32	Glycerophospholipids	Monoacylglycerophosphoethanolamine					LPE(20:5)		LPE_MAPE	LPE	180014		1.5631	0.188016	0.840833	0.537928		2.07845	0.509556	1.61136	0.775269		1.20616	0.0754902	0.337603	0.279899		1.35301	0.165935	0.524733	0.387826			0.75205	-0.4111	0.362186		0.891463	-0.165753	0.359776
MAPE35	Glycerophospholipids	1-Monoacylglycerophosphoethanolamine				PE(22:4/0:0)		HMDB11523	LPE_1MAPE	LPE	180016		21.2492	2.44588	10.9383	0.514763		20.5149	4.199	13.2784	0.647257		4.46036	0.26699	1.19402	0.267695		4.23011	0.539652	1.70653	0.403424			1.03579	0.0507384	0.872874		1.05443	0.076464	0.669844
MAPE36	Glycerophospholipids	Monoacylglycerophosphoethanolamine					PE(22:5/0:0)		LPE_MAPE	LPE	180017		7.25949	0.796201	3.56072	0.490491		8.00311	1.85449	5.86442	0.732767		2.61619	0.147802	0.66099	0.252654		2.67248	0.30929	0.97806	0.365974			0.907083	-0.140693	0.668295		0.978934	-0.0307165	0.852973
MAPE37	Glycerophospholipids	Monoacylglycerophosphoethanolamine					PE(22:5/0:0)		LPE_MAPE	LPE	180018		8.32369	0.956821	4.27903	0.514079		8.62706	2.42341	7.66349	0.888309		2.79048	0.168107	0.751796	0.269415		2.70899	0.378365	1.19649	0.441675			0.964835	-0.0516456	0.909251		1.03008	0.0427563	0.820487
MAPE38	Glycerophospholipids	Monoacylglycerophosphoethanolamine					PE(22:5/0:0)		LPE_MAPE	LPE	180019		3.1295	0.341336	1.5265	0.487778		2.34046	0.387401	1.22507	0.523431		1.72481	0.0901797	0.403296	0.23382		1.46155	0.150676	0.476478	0.326009			1.33713	0.41914	0.167165		1.18013	0.238941	0.12363
MAPE39	Glycerophospholipids	Monoacylglycerophosphoethanolamine					PE(22:5/0:0)		LPE_MAPE	LPE	180020		4.54096	0.53517	2.39336	0.527059		3.90869	0.675895	2.13737	0.546824		2.06859	0.117408	0.525065	0.253828		1.87639	0.207591	0.656461	0.349853			1.16176	0.216312	0.486361		1.10243	0.140685	0.391869
MAPE41	Glycerophospholipids	1-Monoacylglycerophosphoethanolamine				PE(22:6/0:0)		HMDB11526	LPE_1MAPE	LPE	180021		45.1798	5.27209	23.5775	0.521859		53.0595	8.60578	27.2139	0.512893		6.48809	0.40292	1.80191	0.277727		6.9372	0.740479	2.3416	0.337543			0.851493	-0.231933	0.419015		0.93526	-0.0965604	0.56502
MAPE07	Glycerophospholipids	2-Monoacylglycerophosphoethanolamine				PE(0:0/16:0)		HMDB11473	LPE_2MAPE	LPE	190001		11.1474	1.36028	6.08337	0.545721		11.6713	2.27377	7.19029	0.616068		3.24014	0.184805	0.826475	0.255074		3.27064	0.329001	1.04039	0.318101			0.955117	-0.0662507	0.83567		0.990675	-0.0135164	0.930959
MAPE13	Glycerophospholipids	2-Monoacylglycerophosphoethanolamine				PE(0:0/18:0)		HMDB11129	LPE_2MAPE	LPE	190003		19.8092	3.65192	16.3319	0.82446		24.0978	4.16177	13.1607	0.546137		4.18787	0.345722	1.54612	0.36919		4.68817	0.485205	1.53435	0.327282			0.822035	-0.282729	0.47763		0.893284	-0.162809	0.409382
MAPE15	Glycerophospholipids	2-Monoacylglycerophosphoethanolamine				PE(0:0/18:1)		HMDB11476	LPE_2MAPE	LPE	190004		38.4078	3.47019	15.5192	0.404063		45.5616	9.65524	30.5325	0.670138		6.07971	0.275766	1.23326	0.202849		6.39159	0.723352	2.28744	0.357883			0.842986	-0.246419	0.499633		0.951205	-0.0721722	0.694311
MAPE28	Glycerophospholipids	Monoacylglycerophosphoethanolamine					PE(0:0/20:3)	HMDB11485	LPE_MAPE	LPE	190006		2.15257	0.185651	0.830258	0.385706		2.55268	0.629586	1.99093	0.779935		1.4435	0.0602091	0.269263	0.186535		1.50352	0.180155	0.569702	0.378911			0.843256	-0.245957	0.554991		0.960078	-0.0587764	0.75789
MAPE30	Glycerophospholipids	2-Monoacylglycerophosphoethanolamine				PE(0:0/20:4)		HMDB11487	LPE_2MAPE	LPE	190007		90.2459	9.68661	43.3198	0.48002		79.5982	19.1605	60.5909	0.761209		9.2237	0.521604	2.33268	0.252901		8.38254	1.01824	3.21995	0.384126			1.13377	0.181125	0.583278		1.10035	0.137958	0.419464
MAPE34	Glycerophospholipids	2-Monoacylglycerophosphoethanolamine				PE(0:0/22:4)		HMDB11493	LPE_2MAPE	LPE	190008		26.6477	2.5599	11.4482	0.429613		24.781	4.46245	14.1115	0.569448		5.05221	0.243099	1.08717	0.215187		4.76352	0.48189	1.52387	0.319904			1.07533	0.104774	0.69969		1.06061	0.0848888	0.553969
MAPE40	Glycerophospholipids	2-Monoacylglycerophosphoethanolamine				PE(0:0/22:6)		HMDB11496	LPE_2MAPE	LPE	190009		33.7319	3.28045	14.6706	0.434918		37.5431	6.93405	21.9274	0.584058		5.67591	0.282474	1.26326	0.222566		5.80172	0.656858	2.07717	0.358026			0.898485	-0.154434	0.574844		0.978314	-0.0316306	0.83773
MEPE08	Glycerophospholipids	1-Monoetherglycerophosphoethanolamine				PE(O-16:0/0:0)			LPE_1MEPE	LPE	200001		8.40423	0.913587	4.08568	0.486146		8.54163	1.2826	4.05595	0.474845		2.82185	0.152419	0.681638	0.241557		2.84262	0.226357	0.715804	0.251811			0.983913	-0.0233969	0.93126		0.992692	-0.0105814	0.938842
MEPE09	Glycerophospholipids	1-Monoetherglycerophosphoethanolamine			Plasmalogen	PE(P-16:1/0:0)			LPE_1MEPE	LPE	200002		70.9854	5.73631	25.6536	0.361392		74.3069	12.2691	38.7984	0.522137		8.2861	0.349882	1.56472	0.188837		8.35243	0.710541	2.24693	0.269015			0.9553	-0.0659739	0.780657		0.992059	-0.0115026	0.925382
MEPE12	Glycerophospholipids	1-Monoetherglycerophosphoethanolamine			Plasmalogen	PE(P-18:0/0:0)			LPE_1MEPE	LPE	200003		64.3824	5.00706	22.3922	0.3478		71.5115	11.4189	36.1098	0.504951		7.91238	0.305798	1.36757	0.172839		8.18789	0.70474	2.22858	0.27218			0.900309	-0.151507	0.509619		0.966351	-0.0493805	0.677519
DAPC47	Glycerophospholipids	Diacylglycerophosphocholine				PC(30:0)	PC(16:0/14:0) + PC(14:0/16:0)		PC_DAPC	PC	220002		2.50185	0.351763	1.57313	0.628788		1.18173	0.349941	1.10661	0.936433		1.50161	0.114019	0.50991	0.339575		0.953506	0.174023	0.55031	0.577143			2.1171	1.08209	0.0250575		1.57483	0.655198	0.0114992
DAPC05	Glycerophospholipids	Diacylglycerophosphocholine				PC(14:0/18:2)		HMDB07874	PC_DAPC	PC	220005		0.156837	0.0254583	0.11097	0.707548		0.0835226	0.0234558	0.0741739	0.88807		0.372514	0.0316848	0.138111	0.370754		0.255627	0.0449413	0.142117	0.555955			1.87779	0.909032	0.0720014		1.45726	0.543256	0.0410761
DAPC03	Glycerophospholipids	Diacylglycerophosphocholine				PC(16:0/16:0)		HMDB00564	PC_DAPC	PC	220006		21.763	3.22368	14.4167	0.662444		10.1092	3.53857	11.1899	1.1069		4.40601	0.351687	1.57279	0.356965		2.67513	0.572802	1.81136	0.67711			2.15278	1.1062	0.0335892		1.64703	0.719865	0.0115389
DAPC04	Glycerophospholipids	Diacylglycerophosphocholine				PC(32:1)	PC(16:0/16:1) + PC(14:1/18:0) + PC(14:0/18:1)		PC_DAPC	PC	220007		4.17345	0.67421	3.01516	0.722462		2.38853	0.62638	1.98079	0.829291		1.92636	0.156033	0.697801	0.362238		1.38278	0.230087	0.7276	0.526188			1.74729	0.805119	0.101992		1.39311	0.478313	0.0571662
DAPE04	Glycerophospholipids	Diacylglycerophosphocholine				PC(16:0/17:0)			PC_DAPC	PC	220009		0.0892765	0.0143609	0.064224	0.719382		0.0513153	0.0163154	0.0515938	1.00543		0.281828	0.0227685	0.101824	0.361298		0.195212	0.0383078	0.12114	0.620555			1.73977	0.798893	0.116149		1.4437	0.529769	0.0485032
DAPE05	Glycerophospholipids	Diacylglycerophosphocholine				PC(33:1)	PC(15:0/18:1) + PC(16:0/17:1)		PC_DAPC	PC	220010		0.469371	0.0948877	0.413606	0.881192		0.23517	0.0621066	0.196398	0.835134		0.63477	0.0607533	0.264818	0.417186		0.436646	0.0703244	0.222385	0.509303			1.99588	0.997025	0.0486812		1.45374	0.539769	0.0537795
DAPC09	Glycerophospholipids	Diacylglycerophosphocholine				PC(14:0/20:4)		HMDB07883	PC_DAPC	PC	220011		0.0478812	0.00894454	0.0379485	0.792554		0.0158257	0.00422419	0.0133581	0.844075		0.204163	0.0190954	0.0810148	0.396815		0.112537	0.0187411	0.0592646	0.526622			3.02554	1.59719	0.00357724		1.81418	0.859318	0.00427811
DAPC06	Glycerophospholipids	Diacylglycerophosphocholine				PC(16:0/18:0)		HMDB07970	PC_DAPC	PC	220012		2.07381	0.30723	1.37398	0.662537		1.28915	0.408584	1.29205	1.00225		1.36401	0.105949	0.473819	0.347371		0.98476	0.188384	0.595724	0.604943			1.60867	0.685864	0.1441		1.38512	0.470014	0.0681631
DAPC07	Glycerophospholipids	Diacylglycerophosphocholine				PC(16:0/18:1)		HMDB07972	PC_DAPC	PC	220013		89.8196	16.3682	73.201	0.814978		42.1495	14.3856	45.4913	1.07928		8.73461	0.843742	3.77333	0.431997		5.50638	1.14646	3.62542	0.658403			2.13098	1.09152	0.0710111		1.58627	0.665641	0.0334434
DAPC08	Glycerophospholipids	Diacylglycerophosphocholine				PC(16:0/18:2)		HMDB07973	PC_DAPC	PC	220014		8.86659	1.22077	5.45944	0.615732		5.91214	1.34521	4.25394	0.719526		2.84095	0.20463	0.915134	0.322122		2.2682	0.292006	0.923403	0.407108			1.49972	0.584698	0.146142		1.25251	0.324824	0.118337
DAPE12	Glycerophospholipids	Diacylglycerophosphocholine				PC(16:0/19:1)			PC_DAPC	PC	220021		0.789301	0.135887	0.607707	0.769931		0.396368	0.107242	0.339129	0.855591		0.828107	0.0738203	0.330135	0.398662		0.562103	0.0945208	0.298901	0.531755			1.99133	0.993736	0.0688859		1.47323	0.558982	0.0409071
DAPE13	Glycerophospholipids	Diacylglycerophosphocholine				PC(17:1/18:1)			PC_DAPC	PC	220024		0.264913	0.0419439	0.187579	0.708076		0.134909	0.0311653	0.0985532	0.730516		0.485321	0.039321	0.175849	0.362335		0.342002	0.0446513	0.1412	0.412863			1.96365	0.973535	0.0505782		1.41906	0.504936	0.0335103
DAPC14	Glycerophospholipids	Diacylglycerophosphocholine				PC(16:0/20:4)		HMDB07982	PC_DAPC	PC	220027		8.58069	1.06623	4.76834	0.555706		4.77266	1.09841	3.47347	0.727785		2.78969	0.204979	0.916695	0.328601		2.02024	0.277151	0.876428	0.433825			1.79788	0.846299	0.0333786		1.38087	0.465582	0.0363955
DAPC15	Glycerophospholipids	Diacylglycerophosphocholine				PC(16:0/20:5)		HMDB07984	PC_DAPC	PC	220028		0.531267	0.0786361	0.351671	0.661948		0.386772	0.059665	0.188677	0.487826		0.6791	0.060737	0.271624	0.399977		0.600593	0.0538097	0.170161	0.283322			1.37359	0.457955	0.237098		1.13071	0.177235	0.412506
DAPC11	Glycerophospholipids	Diacylglycerophosphocholine				PC(18:0/18:1)		HMDB08038	PC_DAPC	PC	220030		14.4104	2.39449	10.7085	0.743106		8.32342	2.73605	8.65216	1.0395		3.54713	0.310204	1.38727	0.391097		2.48016	0.491284	1.55358	0.626402			1.73131	0.791866	0.130671		1.4302	0.516221	0.0665068
DAPC12	Glycerophospholipids	Diacylglycerophosphocholine				PC(18:0/18:2)		HMDB08039	PC_DAPC	PC	220031		10.0808	1.39734	6.24909	0.619897		5.93266	1.62699	5.145	0.867234		3.02753	0.219439	0.981359	0.324145		2.19202	0.353976	1.11937	0.510655			1.69921	0.764865	0.0810069		1.38116	0.465877	0.0449553
DAPC13	Glycerophospholipids	Diacylglycerophosphocholine				PC(18:2/18:2)		HMDB08138	PC_DAPC	PC	220033		1.66863	1.39856	6.25456	3.74832		0.179979	0.0399759	0.126415	0.702388		0.732367	0.244117	1.09173	1.49068		0.399703	0.0473948	0.149875	0.374967			9.27128	3.21277	0.300651		1.83228	0.873639	0.195705
DAPC41_DAPC42	Glycerophospholipids	Diacylglycerophosphocholine				PC(36:3)			PC_DAPC	PC	220035		2.26504	0.31445	1.40626	0.620857		1.22745	0.270653	0.855881	0.697282		1.43248	0.105888	0.473546	0.330577		1.03707	0.129929	0.410873	0.396185			1.84531	0.883866	0.041821		1.38127	0.466	0.0327026
DAPC24	Glycerophospholipids	Diacylglycerophosphocholine				PC(16:0/22:6)		HMDB07991	PC_DAPC	PC	220044		1.31982	0.192057	0.858905	0.650777		0.887995	0.162381	0.513494	0.578262		1.08631	0.0857627	0.383542	0.353069		0.902127	0.0907755	0.287057	0.318201			1.48629	0.571713	0.156157		1.20416	0.268031	0.191633
DAPC18	Glycerophospholipids	Diacylglycerophosphocholine				PC(18:0/20:3)		HMDB08046	PC_DAPC	PC	220045		0.740192	0.109154	0.488153	0.659495		0.319729	0.0663853	0.209929	0.656584		0.810769	0.066033	0.295308	0.364233		0.52826	0.0672227	0.212577	0.402409			2.31507	1.21105	0.00272741		1.53479	0.618042	0.0119958
DAPC19	Glycerophospholipids	Diacylglycerophosphocholine				PC(18:0/20:4)		HMDB08048	PC_DAPC	PC	220046		9.03541	1.35321	6.05173	0.669779		3.58677	1.08404	3.42803	0.955743		2.80989	0.24494	1.09541	0.38984		1.65514	0.30683	0.970281	0.586225			2.51909	1.3329	0.0137403		1.69768	0.763565	0.00869646
DAPC23	Glycerophospholipids	Diacylglycerophosphocholine				PC(18:2/20:4)		HMDB08147	PC_DAPC	PC	220047		0.338227	0.0364579	0.163045	0.482057		0.181889	0.0495717	0.156759	0.861842		0.558376	0.0373059	0.166837	0.298789		0.38611	0.0603762	0.190926	0.494486			1.85953	0.894934	0.018279		1.44616	0.532224	0.0168206
DAPC26	Glycerophospholipids	Diacylglycerophosphocholine				PC(18:0/22:4)		HMDB08054	PC_DAPC	PC	220049		0.406312	0.0625502	0.279733	0.688468		0.250511	0.0964292	0.304936	1.21725		0.598519	0.0503081	0.224984	0.375902		0.42872	0.0860944	0.272254	0.63504			1.62193	0.697713	0.173557		1.39606	0.481361	0.079822
DAPC29	Glycerophospholipids	Diacylglycerophosphocholine				PC(18:0/22:5)		HMDB08056	PC_DAPC	PC	220050		0.281804	0.0642955	0.280257	0.994512		0.0747058	0.0296997	0.0939187	1.25718		0.478528	0.0541678	0.236112	0.493413		0.225253	0.0516044	0.163187	0.724464			3.77218	1.9154	0.00737036		2.12441	1.08706	0.00545331
DAPC30	Glycerophospholipids	Diacylglycerophosphocholine				PC(18:0/22:6)		HMDB08057	PC_DAPC	PC	220051		1.12711	0.147372	0.659066	0.58474		0.666439	0.128781	0.40724	0.611069		1.00654	0.0774525	0.346378	0.344126		0.769664	0.0907113	0.286854	0.372701			1.69124	0.758085	0.0534707		1.30777	0.387111	0.0730859
DAPC32	Glycerophospholipids	Diacylglycerophosphocholine				PC(18:1/22:6)		HMDB08123	PC_DAPC	PC	220052		0.262131	0.0394899	0.172132	0.656666		0.137924	0.0345792	0.109349	0.792822		0.48585	0.0380648	0.16592	0.341506		0.338916	0.0506179	0.160068	0.472294			1.90055	0.926416	0.0488043		1.43354	0.519582	0.0298388
DAPC28	Glycerophospholipids	Diacylglycerophosphocholine				PC(40:5)			PC_DAPC	PC	220055		0.104047	0.0155247	0.0676707	0.650388		0.0372485	0.00997281	0.0315368	0.84666		0.305249	0.0245738	0.107115	0.350909		0.173502	0.0281771	0.0891039	0.513561			2.79331	1.48198	0.00120785		1.75934	0.815035	0.00256361
DAPC34	Glycerophospholipids	Diacylglycerophosphocholine				PC(40:8)	PC(20:4/20:4) + PC(18:2/22:6) + PC(18:0/22:8)		PC_DAPC	PC	220056		0.0578689	0.00846235	0.0368865	0.637416		0.0278168	0.010935	0.0345795	1.24312		0.227763	0.0182468	0.0795359	0.349205		0.143996	0.0280514	0.0887065	0.616035			2.08036	1.05683	0.042542		1.58173	0.661504	0.0151964
DAPC50	Glycerophospholipids	Diacylglycerophosphocholine				PC(40:0)	PC (20:0/20:0) + PC(16:0/24:0) + PC(18:0/22:0)		PC_DAPC	PC	220057		0.174544	0.0504063	0.225424	1.2915		0.0302664	0.0156261	0.0468782	1.54885		0.350076	0.0523103	0.233939	0.668251		0.140669	0.0361915	0.108575	0.771844			5.76692	2.5278	0.0120173		2.48865	1.31536	0.00278418
DAPC37	Glycerophospholipids	Diacylglycerophosphocholine				PC(22:4/20:4)		HMDB08640	PC_DAPC	PC	220061		0.0297341	0.00427643	0.0181434	0.610188		0.00918738	0.00247626	0.00783063	0.852324		0.163364	0.0133865	0.0567939	0.347653		0.0855584	0.0144035	0.0455477	0.532358			3.2364	1.69439	0.000329951		1.90938	0.933106	0.000990904
DAPC20	Glycerophospholipids	Diacylglycerophosphocholine				PC(38:5)	PC(18:1/20:4) + PC(16:0/22:5)		PC_DAPC	PC	220064		1.70082	0.241165	1.07852	0.63412		0.935591	0.215482	0.681414	0.728324		1.23453	0.0964525	0.431348	0.349404		0.89386	0.123201	0.389595	0.435857			1.8179	0.862277	0.0509442		1.38112	0.465838	0.0446379
MEMAPC01	Glycerophospholipids	1-ether, 2-acylglycerophosphocholine				PC(O-16:0/14:0)			PC_1ME2MAPC	PC	230501		0.0473958	0.00881507	0.0394222	0.831765		0.0196258	0.00615874	0.0194757	0.992348		0.203183	0.017936	0.0802122	0.394778		0.123681	0.0219312	0.0693525	0.560736			2.41497	1.27201	0.0153325		1.6428	0.716157	0.0124923
MEMAPC03	Glycerophospholipids	1-ether, 2-acylglycerophosphocholine				PC(O-16:0/16:0)			PC_1ME2MAPC	PC	230502		0.6025	0.099149	0.443408	0.735947		0.262339	0.0763291	0.241374	0.920084		0.728579	0.0614185	0.274672	0.376997		0.456882	0.077171	0.244036	0.534135			2.29664	1.19953	0.0323712		1.59468	0.673265	0.0132383
MEMAPC17	Glycerophospholipids	1-ether, 2-acylglycerophosphocholine				PC(O-16:0/20:4)		HMDB13407	PC_1ME2MAPC	PC	230505		0.330009	0.0546408	0.244361	0.740468		0.14081	0.0357489	0.113048	0.802843		0.539518	0.0452652	0.202432	0.375209		0.34453	0.0495633	0.156733	0.454918			2.34365	1.22876	0.00723463		1.56595	0.647041	0.0126489
MEMAPC22	Glycerophospholipids	1-ether, 2-acylglycerophosphocholine				PC(O-18:0/20:4)		HMDB13420	PC_1ME2MAPC	PC	230508		0.160083	0.0241016	0.107786	0.67331		0.066339	0.016795	0.0531104	0.80059		0.376678	0.0309471	0.138399	0.367421		0.234918	0.0352021	0.111319	0.473863			2.41311	1.27089	0.00348241		1.60345	0.681178	0.00896147
MEMAPC13	Glycerophospholipids	1-ether, 2-acylglycerophosphocholine				PC(O-18:1/18:2)			PC_1ME2MAPC	PC	230511		0.0466838	0.00768383	0.0343631	0.736083		0.028911	0.0120578	0.03813	1.31887		0.199281	0.0191542	0.0856602	0.429846		0.14239	0.0309771	0.0979581	0.687959			1.61474	0.691302	0.208155		1.39955	0.484962	0.113067
MEMAPC32	Glycerophospholipids	1-ether, 2-acylglycerophosphocholine				PC(O-18:1/22:4)			PC_1ME2MAPC	PC	230514		0.0240242	0.00597123	0.0253338	1.05451		0.00982901	0.00327283	0.0103496	1.05296		0.140904	0.0156624	0.0664497	0.471595		0.0867799	0.0159801	0.0505335	0.582318			2.44422	1.28937	0.0476598		1.6237	0.699281	0.0342476
MEMAPC31	Glycerophospholipids	1-ether, 2-acylglycerophosphocholine				PC(O-20:0/20:4)		HMDB13442	PC_1ME2MAPC	PC	230516		0.0231698	0.00480173	0.020372	0.87925		0.0101966	0.0029836	0.00943498	0.92531		0.140051	0.0144619	0.0613566	0.438102		0.0906741	0.0148128	0.0468422	0.516599			2.27231	1.18416	0.0302387		1.54455	0.627189	0.0364319
MEMAPC35	Glycerophospholipids	1-ether, 2-acylglycerophosphocholine				PC(O-22:1/20:4)			PC_1ME2MAPC	PC	230519		0.0379651	0.00639927	0.0278938	0.734721		0.0147458	0.00583503	0.0175051	1.18713		0.182689	0.0159682	0.0696039	0.380996		0.105275	0.0213978	0.0641933	0.609766			2.57464	1.36437	0.030997		1.73535	0.795226	0.00919837
MEMAPC38	Glycerophospholipids	1-ether, 2-acylglycerophosphocholine				PC(O-24:1/20:4)			PC_1ME2MAPC	PC	230520		0.0829324	0.013526	0.0589586	0.710923		0.0306084	0.0116901	0.0369673	1.20775		0.271405	0.0226958	0.0989289	0.364507		0.151304	0.0292791	0.0925885	0.611936			2.70947	1.43801	0.0170186		1.79377	0.842994	0.0037372
MEMAPC05	Glycerophospholipids	1-ether, 2-acylglycerophosphocholine				PC(O-34:0)	PC(O-16:0/18:0) + PC(O-18:0/16:0)		PC_1ME2MAPC	PC	230521		0.106728	0.0182354	0.081551	0.7641		0.0474312	0.0131277	0.0415134	0.875234		0.305439	0.0265917	0.118922	0.389348		0.193704	0.0331827	0.104933	0.541718			2.25017	1.17003	0.0134398		1.57683	0.657029	0.0178327
MEMAPC06	Glycerophospholipids	1-ether, 2-acylglycerophosphocholine				PC(O-34:1)	PC(O-16:0/18:1) + PC(18:1e/16:0)		PC_1ME2MAPC	PC	230522		1.40134	0.242701	1.08539	0.774538		0.651362	0.181625	0.574348	0.881764		1.11014	0.0942949	0.421699	0.379863		0.726044	0.117483	0.371515	0.511698			2.1514	1.10528	0.0514128		1.52902	0.612606	0.0212176
MEMAPC24_MEMAPC25	Glycerophospholipids	1-ether, 2-acylglycerophosphocholine				PC(O-38:5)	PC(O-18:1/20:4) + PC(O-18:1/20:4)		PC_1ME2MAPC	PC	230524		0.541608	0.0909204	0.406608	0.750743		0.270797	0.0735055	0.232445	0.858371		0.695411	0.0552562	0.247113	0.355349		0.474015	0.0715754	0.226341	0.477498			2.00005	1.00003	0.0621783		1.46707	0.552933	0.0246036
MEMAPC33_MEMAPC34	Glycerophospholipids	1-ether, 2-acylglycerophosphocholine				PC(O-40:5)			PC_1ME2MAPC	PC	230526		0.0376487	0.00643265	0.0257306	0.683438		0.0152074	0.00381651	0.0120689	0.793619		0.183111	0.0165709	0.0662837	0.361986		0.112562	0.0167902	0.0530954	0.471699			2.47569	1.30783	0.00643928		1.62676	0.702003	0.00909066
MEMAPC02	Glycerophospholipids	1-ether, 2-acylglycerophosphocholine			Plasmalogen	PC(P-16:0/14:0)		HMDB11203	PC_1ME2MAPC	PC	230528		0.0766995	0.0154508	0.0655522	0.854662		0.0319195	0.010363	0.0327706	1.02666		0.257298	0.024849	0.105425	0.40974		0.156177	0.0289221	0.0914596	0.585616			2.4029	1.26478	0.0235277		1.64748	0.720263	0.0172726
MEMAPC04	Glycerophospholipids	1-ether, 2-acylglycerophosphocholine			Plasmalogen	PC(P-16:0/16:0)		HMDB11206	PC_1ME2MAPC	PC	230529		0.831425	0.140303	0.627454	0.754673		0.359351	0.119172	0.376855	1.04871		0.855693	0.0722621	0.323166	0.377665		0.525941	0.0958798	0.303199	0.576488			2.31369	1.21019	0.0378748		1.62698	0.702192	0.0119973
MEMAPC08	Glycerophospholipids	1-ether, 2-acylglycerophosphocholine			Plasmalogen	PC(P-16:0/18:1)			PC_1ME2MAPC	PC	230530		1.64801	0.281264	1.25785	0.763255		0.740628	0.219309	0.693515	0.936388		1.20111	0.103959	0.464918	0.387073		0.765337	0.131185	0.414844	0.542041			2.22515	1.1539	0.0435528		1.56939	0.6502	0.0184017
MEMAPC09	Glycerophospholipids	1-ether, 2-acylglycerophosphocholine			Plasmalogen	PC(P-16:0/18:2)			PC_1ME2MAPC	PC	230531		0.212752	0.0344855	0.154224	0.724901		0.12791	0.0364738	0.11534	0.901732		0.437666	0.0334035	0.149385	0.341322		0.328428	0.0471932	0.149238	0.4544			1.66329	0.734043	0.136465		1.33261	0.414253	0.0693345
MEMAPC19	Glycerophospholipids	1-ether, 2-acylglycerophosphocholine			Plasmalogen	PC(P-16:0/20:4)			PC_1ME2MAPC	PC	230533		1.74197	0.263198	1.17706	0.675705		0.730592	0.205761	0.650675	0.890612		1.24842	0.0982526	0.439399	0.351964		0.77532	0.11994	0.379285	0.489197			2.38433	1.25358	0.0178319		1.6102	0.687239	0.00715809
MEMAPC29	Glycerophospholipids	1-ether, 2-acylglycerophosphocholine			Plasmalogen	PC(P-16:0/22:6)			PC_1ME2MAPC	PC	230534		0.062293	0.00938989	0.0409296	0.657049		0.0276216	0.00752772	0.0238047	0.861815		0.234878	0.0198962	0.0867257	0.369238		0.148537	0.0248519	0.0785886	0.529086			2.25522	1.17327	0.02077		1.58128	0.661092	0.0139988
MEMAPC26	Glycerophospholipids	1-ether, 2-acylglycerophosphocholine			Plasmalogen	PC(P-18:0/20:4)			PC_1ME2MAPC	PC	230538		0.153465	0.0315897	0.141273	0.920558		0.0523835	0.0196738	0.0622141	1.18767		0.360398	0.035227	0.15754	0.437128		0.18848	0.0432804	0.136865	0.726148			2.92964	1.55072	0.0112322		1.91213	0.935179	0.00658142
MEMAPC27	Glycerophospholipids	1-ether, 2-acylglycerophosphocholine			Plasmalogen	PC(P-18:0/20:4)			PC_1ME2MAPC	PC	230539		0.243084	0.0407345	0.18217	0.749414		0.0936885	0.0312873	0.098939	1.05604		0.460775	0.0402427	0.179971	0.390582		0.269667	0.0482682	0.152638	0.566023			2.59459	1.37551	0.0228846		1.70868	0.772886	0.00764351
MEMAPC15_MEMAPC16	Glycerophospholipids	1-ether, 2-acylglycerophosphocholine			Plasmalogen	PC(P-36:2)	PC(P-18:1/18:1) + PC(P-18:0/18:2)		PC_1ME2MAPC	PC	230541		0.201168	0.0332358	0.148635	0.73886		0.103996	0.0304043	0.096147	0.924525		0.42082	0.0355987	0.159202	0.378314		0.287123	0.0489402	0.154763	0.539011			1.93438	0.951872	0.0716837		1.46564	0.551535	0.0371955
MAPC02	Glycerophospholipids	1-Monoacylglycerophosphocholine				PC(14:0/0:0)		HMDB10379	LPC_1MAPC	LPC	240001		8.29998	1.32596	5.92987	0.714444		6.38697	0.94576	2.99075	0.468258		2.76336	0.186916	0.835914	0.302499		2.44956	0.207261	0.655417	0.267565			1.29952	0.377975	0.250073		1.1281	0.173899	0.3093
MAPC04	Glycerophospholipids	1-Monoacylglycerophosphocholine				PC(15:0/0:0)		HMDB10381	LPC_1MAPC	LPC	240002		3.47328	0.452107	2.02188	0.582125		3.59586	0.635105	2.00838	0.558525		1.80164	0.109391	0.489213	0.271537		1.83526	0.159051	0.502962	0.274055			0.965911	-0.0500383	0.87647		0.981682	-0.026673	0.86169
MAPC16	Glycerophospholipids	1-Monoacylglycerophosphocholine				PC(18:1/0:0)			LPC_1MAPC	LPC	240010		190.369	41.0719	183.679	0.964858		169.247	26.3141	83.2126	0.491663		12.9372	1.10019	4.92022	0.380315		12.5209	1.17735	3.72309	0.297351			1.1248	0.169668	0.668332		1.03325	0.0471915	0.815736
MAPC52	Glycerophospholipids	1-Monoacylglycerophosphocholine				PC(19:0/0:0)			LPC_1MAPC	LPC	240016		121.868	43.5767	194.881	1.59911		29.9955	5.50254	17.4005	0.580105		9.41521	1.32232	5.91359	0.628089		5.13945	0.630835	1.99487	0.388149			4.06288	2.0225	0.0497034		1.83195	0.873379	0.00719893
MAPC26	Glycerophospholipids	1-Monoacylglycerophosphocholine				PC(20:0/0:0)		HMDB10390	LPC_1MAPC	LPC	240017		1.9585	0.237081	1.06026	0.541362		1.50907	0.227328	0.718875	0.476369		1.35366	0.0814683	0.364337	0.269149		1.19792	0.0907181	0.286876	0.239479			1.29782	0.376092	0.238667		1.13001	0.17634	0.248701
MAPC28	Glycerophospholipids	1-Monoacylglycerophosphocholine				PC(20:1/0:0)			LPC_1MAPC	LPC	240018		6.94467	0.816819	3.65292	0.526004		7.26891	1.17649	3.7204	0.511824		2.54299	0.15859	0.709235	0.278898		2.60846	0.227264	0.718673	0.275516			0.955395	-0.0658314	0.821445		0.974902	-0.0366714	0.814138
MAPC38	Glycerophospholipids	1-Monoacylglycerophosphocholine				PC(20:4/0:0)		HMDB10395	LPC_1MAPC	LPC	240024		46.3243	7.81902	34.9677	0.754846		38.8717	6.91189	21.8573	0.562293		6.44031	0.505067	2.25873	0.350717		5.95126	0.619518	1.95909	0.329189			1.19172	0.253047	0.5444		1.08217	0.113934	0.564749
MAPC43	Glycerophospholipids	1-Monoacylglycerophosphocholine				PC(22:4/0:0)			LPC_1MAPC	LPC	240027		3.93645	0.610869	2.73189	0.693998		3.36573	0.719043	2.27381	0.675578		1.87626	0.147989	0.661826	0.352738		1.72661	0.206704	0.653655	0.378577			1.16957	0.225975	0.574436		1.08667	0.119912	0.562491
MAPC49	Glycerophospholipids	1-Monoacylglycerophosphocholine				PC(22:6/0:0)		HMDB10404	LPC_1MAPC	LPC	240030		12.6775	2.05929	9.20943	0.72644		14.2668	2.49257	7.88218	0.552485		3.35996	0.270299	1.20881	0.359771		3.62283	0.356203	1.12641	0.310921			0.888601	-0.170392	0.644772		0.927441	-0.108672	0.570715
MAPC03	Glycerophospholipids	2-Monoacylglycerophosphocholine				PC(0:0/14:0)		HMDB10379	LPC_2MAPC	LPC	250001		2.34658	0.286942	1.28324	0.546856		1.84882	0.261588	0.827214	0.447428		1.48419	0.0869878	0.389021	0.26211		1.31879	0.110362	0.348996	0.264634			1.26923	0.343958	0.275866		1.12542	0.170461	0.266439
MAPC08	Glycerophospholipids	2-Monoacylglycerophosphocholine				PC(0:0/16:1)			LPC_2MAPC	LPC	250004		1.65107	0.221007	0.988372	0.598625		1.79871	0.375786	1.18834	0.660662		1.2368	0.0799296	0.357456	0.289016		1.28622	0.126642	0.400479	0.31136			0.917918	-0.123563	0.721011		0.961579	-0.056523	0.73404
MAPC15	Glycerophospholipids	2-Monoacylglycerophosphocholine				PC(0:0/18:1)			LPC_2MAPC	LPC	250008		87.9965	10.3851	46.4435	0.527788		89.8588	14.0444	44.4122	0.494245		9.07173	0.547737	2.44955	0.270021		9.12672	0.85386	2.70014	0.29585			0.979276	-0.0302132	0.917136		0.993974	-0.00872001	0.955688
MAPC27	Glycerophospholipids	2-Monoacylglycerophosphocholine				PC(0:0/20:1)			LPC_2MAPC	LPC	250012		1.23015	0.138212	0.618103	0.502461		1.48023	0.372915	1.17926	0.796676		1.07257	0.0647823	0.289715	0.270113		1.13889	0.142659	0.451127	0.396112			0.831054	-0.266986	0.541724		0.941772	-0.0865498	0.628323
MAPC37	Glycerophospholipids	2-Monoacylglycerophosphocholine				PC(0:0/20:4)		HMDB10395	LPC_2MAPC	LPC	250017		29.5882	3.32228	14.8577	0.50215		27.1761	5.12077	16.1933	0.595864		5.23425	0.339569	1.5186	0.290127		4.98961	0.503317	1.59163	0.318989			1.08876	0.122682	0.687058		1.04903	0.0690563	0.685275
MAPC41	Glycerophospholipids	2-Monoacylglycerophosphocholine				PC(0:0/22:4)			LPC_2MAPC	LPC	250019		3.07739	0.368134	1.64634	0.53498		2.17618	0.319309	1.00974	0.463997		1.68347	0.113162	0.506075	0.300613		1.43172	0.118493	0.374707	0.261718			1.41412	0.499907	0.125175		1.17584	0.233693	0.175698
MAPC44	Glycerophospholipids	2-Monoacylglycerophosphocholine				PC(0:0/22:5)			LPC_2MAPC	LPC	250020		2.21193	0.259086	1.15867	0.523826		2.12099	0.453756	1.4349	0.676524		1.42025	0.101264	0.452865	0.318864		1.39785	0.136219	0.430763	0.30816			1.04287	0.0605661	0.852835		1.01602	0.0229284	0.897752
MAPC48	Glycerophospholipids	2-Monoacylglycerophosphocholine				PC(0:0/22:6)		HMDB10404	LPC_2MAPC	LPC	250022		6.01377	0.837359	3.74478	0.622702		7.05939	1.70994	5.40729	0.765972		2.34645	0.163503	0.731209	0.311623		2.50815	0.292231	0.924114	0.368445			0.851883	-0.231273	0.539769		0.935532	-0.0961406	0.605111
MEPC05	Glycerophospholipids	1-Monoetherglycerophosphocholine				PC(O-18:1/0:0)			LPC_1MEPC	LPC	270103		7.13294	0.705191	3.15371	0.442133		8.53721	1.79503	5.67639	0.6649		2.60011	0.139996	0.626082	0.240791		2.77026	0.309638	0.97916	0.353455			0.835511	-0.259268	0.480661		0.938579	-0.0914493	0.56669
MEPC03	Glycerophospholipids	1-Monoetherglycerophosphocholine			Plasmalogen	PC(P-16:0/0:0)		HMDB10407	LPC_1MEPC	LPC	270114		15.6901	1.34289	6.00561	0.382764		16.3162	3.27567	10.3586	0.634865		3.87399	0.1895	0.847471	0.218759		3.87297	0.382438	1.20938	0.312261			0.961626	-0.0564529	0.862541		1.00026	0.000380122	0.99787
MEPC07	Glycerophospholipids	1-Monoetherglycerophosphocholine			Plasmalogen	PC(P-18:0/0:0)		HMDB13122	LPC_1MEPC	LPC	270115		3.09106	0.540869	2.41884	0.782527		2.62843	0.551779	1.74488	0.663849		1.66319	0.130758	0.584768	0.351594		1.54738	0.16126	0.50995	0.329557			1.17601	0.233904	0.595535		1.07484	0.104128	0.598745
MAPI02	Glycerophospholipids	Monoacylglycerophosphoinositol				LPI(16:0)			LPI_MAPI	LPI	290002		6.99939	0.757372	3.38707	0.483909		9.27491	1.49127	4.71579	0.508446		2.57139	0.142784	0.638551	0.248329		2.95823	0.24125	0.762901	0.257891			0.754659	-0.406104	0.139619		0.869233	-0.202185	0.153606
MAPI04	Glycerophospholipids	Monoacylglycerophosphoinositol				LPI(18:0)			LPI_MAPI	LPI	290004		50.608	5.1658	23.1022	0.456492		67.8373	8.25741	26.1122	0.384924		6.91379	0.384399	1.71908	0.248646		8.10972	0.479554	1.51648	0.186996			0.74602	-0.422714	0.0756288		0.852531	-0.230175	0.0728517
MAPI11	Glycerophospholipids	Monoacylglycerophosphoinositol				LPI(20:4)			LPI_MAPI	LPI	290011		16.279	3.46005	15.4738	0.95054		18.1999	3.72885	11.7917	0.647898		3.71278	0.362318	1.62034	0.436421		4.0861	0.40875	1.29258	0.316336			0.894453	-0.160922	0.732975		0.908637	-0.138224	0.531855
MAPI12	Glycerophospholipids	Monoacylglycerophosphoinositol				LPI(20:4)			LPI_MAPI	LPI	290012		9.50881	0.942225	4.21376	0.443142		11.0268	1.46364	4.62842	0.419745		2.98782	0.174982	0.782543	0.261911		3.25284	0.22256	0.703796	0.216364			0.86234	-0.213671	0.375424		0.918526	-0.122607	0.37444
Cer_02	Sphingolipids	Ceramides	CER[NS]	Sphingoid base d18:1		Cer(d18:1/16:0)		HMDB04949	Cer	Cer	340001		3.35858	1.58454	7.08627	2.1099		0.547407	0.294369	0.930876	1.70052		1.31961	0.291748	1.30474	0.98873		0.529057	0.172403	0.545186	1.03049			6.13545	2.61717	0.0962459		2.49426	1.31861	0.0272078
Cer_13	Sphingolipids	Ceramides	CER[NS]	Sphingoid base d18:1		Cer(d18:1/18:0)		HMDB04950	Cer	Cer	340003		1.81167	0.911165	4.07485	2.24922		0.248025	0.0883448	0.279371	1.12638		0.943714	0.220177	0.98466	1.04339		0.418164	0.0901623	0.285118	0.681833			7.30441	2.86877	0.103609		2.2568	1.17428	0.0367861
Cer_16	Sphingolipids	Ceramides	CER[NS]	Sphingoid base d18:1		Cer(d18:1/19:0)			Cer	Cer	340004		0.0876308	0.0316806	0.14168	1.61678		0.014674	0.00686122	0.0216971	1.47861		0.234641	0.0414057	0.185172	0.78917		0.092583	0.0260392	0.0823432	0.889399			5.97185	2.57818	0.0353938		2.53439	1.34164	0.00713391
Cer_03	Sphingolipids	Ceramides	CER[NS]	Sphingoid base d18:1		Cer(d18:1/20:0)		HMDB04951	Cer	Cer	340005		1.23077	0.465613	2.08229	1.69185		0.385164	0.23835	0.75373	1.95691		0.855515	0.162037	0.724654	0.847038		0.430888	0.148885	0.470814	1.09266			3.19545	1.67602	0.117837		1.98547	0.989479	0.104736
Cer_04	Sphingolipids	Ceramides	CER[NS]	Sphingoid base d18:1		Cer(d18:1/21:0)			Cer	Cer	340006		0.210101	0.0969387	0.433523	2.0634		0.0369569	0.0209073	0.0661147	1.78897		0.332274	0.072437	0.323948	0.974942		0.134889	0.0456579	0.144383	1.07038			5.68503	2.50717	0.095631		2.46331	1.3006	0.0288292
Cer_05	Sphingolipids	Ceramides	CER[NS]	Sphingoid base d18:1		Cer(d18:1/22:0)		HMDB04952	Cer	Cer	340007		2.42393	0.99532	4.45121	1.83636		0.749823	0.473788	1.49825	1.99814		1.17933	0.233183	1.04283	0.884257		0.577528	0.215067	0.680102	1.17761			3.23266	1.69272	0.141005		2.04203	1.03	0.110075
Cer_06	Sphingolipids	Ceramides	CER[NS]	Mixed sphingoid base		Cer(40:2)			Cer	Cer	340008		0.948632	0.388834	1.73892	1.83308		0.195023	0.104403	0.330152	1.69289		0.745497	0.143796	0.643074	0.862611		0.316453	0.102676	0.324689	1.02603			4.86421	2.28221	0.0748341		2.35579	1.23621	0.021859
Cer_07	Sphingolipids	Ceramides	CER[NS]	Sphingoid base d18:1		Cer(d18:1/23:0)		HMDB00950	Cer	Cer	340009		0.384052	0.170263	0.761438	1.98264		0.0808366	0.0445101	0.140753	1.74121		0.458423	0.0956695	0.427847	0.933301		0.200782	0.0671014	0.212193	1.05684			4.75097	2.24822	0.0992661		2.28319	1.19105	0.035855
Cer_09	Sphingolipids	Ceramides	CER[NS]	Sphingoid base d18:1		Cer(d18:1/24:0)		HMDB04956	Cer	Cer	340011		1.06594	0.505215	2.25939	2.11961		0.168118	0.0819494	0.259147	1.54146		0.751256	0.162474	0.726607	0.96719		0.317589	0.0864453	0.273364	0.860747			6.34046	2.66459	0.0947216		2.36549	1.24214	0.0260385
Cer_10_Cer_11	Sphingolipids	Ceramides	CER[NS]	Mixed sphingoid base		Cer(d18:1/24:1)+Cer(d18:2/24:0)			Cer	Cer	340013		2.28537	1.09159	4.88173	2.13608		0.373367	0.172387	0.545136	1.46005		1.09623	0.238818	1.06803	0.974273		0.486138	0.123395	0.39021	0.802674			6.12097	2.61376	0.0990604		2.25498	1.17311	0.0315904
Cer_12	Sphingolipids	Ceramides	CER[NS]	Mixed sphingoid base		Cer(42:3)			Cer	Cer	340015		0.45075	0.210296	0.940472	2.08646		0.0683287	0.0293735	0.0928872	1.35942		0.49871	0.103119	0.461163	0.924712		0.213488	0.0502786	0.158995	0.744746			6.59679	2.72176	0.0870052		2.33601	1.22404	0.0196615
SphLip_34	Sphingolipids	Sphingomyelin		Sphingoid base d18:0		SM(38:0)			SM	SM	350003		0.076225	0.0261937	0.117142	1.53679		0.0245444	0.00654324	0.0206915	0.843025		0.236047	0.0328526	0.146921	0.622423		0.139125	0.024011	0.0759294	0.545766			3.1056	1.63487	0.0691447		1.69666	0.7627	0.0242827
SphLip_30	Sphingolipids	Sphingomyelin				SM(42:1)			SM	SM	350004		4.11974	1.60498	7.17771	1.74227		1.11103	0.313224	0.990501	0.891513		1.69482	0.256219	1.14585	0.676086		0.949848	0.152324	0.481691	0.507125			3.70802	1.89065	0.0803733		1.78431	0.835366	0.0186921
SphLip_32	Sphingolipids	Sphingomyelin		Sphingoid base d18:1		SM(43:1)			SM	SM	350005		0.0827415	0.034197	0.149061	1.80153		0.0195341	0.00637463	0.0191239	0.979002		0.231666	0.0401888	0.175179	0.75617		0.123771	0.022953	0.0688591	0.556342			4.23576	2.08262	0.0848391		1.87173	0.90437	0.0279118
SphLip_08	Sphingolipids	Sphingomyelin		Mixed sphingoid base		SM(32:1)	SM(d16:1/16:0) + SM(d18:1/14:0)		SM	SM	350007		0.384206	0.110725	0.495179	1.28884		0.0836139	0.0248621	0.078621	0.940286		0.535595	0.0715777	0.320105	0.597662		0.261974	0.0408024	0.129028	0.492524			4.59501	2.20007	0.0150716		2.04446	1.03172	0.00255767
SphLip_09	Sphingolipids	Sphingomyelin		Mixed sphingoid base		SM(33:1)	SM(d17:1/16:0) + SM(d18:1/15:0)		SM	SM	350008		1.17312	0.399842	1.78815	1.52426		0.365173	0.0926405	0.292955	0.802236		0.92731	0.128395	0.574201	0.619211		0.555143	0.0795747	0.251637	0.453284			3.21252	1.6837	0.0623689		1.6704	0.740192	0.0202136
SphLip_02	Sphingolipids	Sphingomyelin		Sphingoid base d18:0		SM(d18:0/14:0)		HMDB12085	SM	SM	350009		0.017802	0.00641379	0.0286833	1.61124		0.00409307	0.0012988	0.00410717	1.00345		0.11084	0.0170393	0.0762022	0.687495		0.0558466	0.0104042	0.0329009	0.58913			4.34931	2.12079	0.0487817		1.98473	0.988942	0.0102658
SphLip_04	Sphingolipids	Sphingomyelin		Sphingoid base d18:0		SM(d18:0/16:0)		HMDB10168	SM	SM	350011		0.579302	0.172616	0.771962	1.33257		0.224005	0.0563798	0.178289	0.795913		0.669383	0.0831068	0.371665	0.555235		0.432463	0.0641018	0.202708	0.468729			2.58611	1.37078	0.0627948		1.54784	0.630257	0.0718856
SphLip_05	Sphingolipids	Sphingomyelin		Sphingoid base d18:0		SM(d18:0/18:0)		HMDB12087	SM	SM	350012		0.284717	0.0859671	0.384456	1.35031		0.144448	0.0351598	0.111185	0.769726		0.464804	0.06012	0.268865	0.578447		0.345736	0.0526145	0.166382	0.48124			1.97107	0.97898	0.143805		1.34439	0.426953	0.21206
SphLip_06	Sphingolipids	Sphingomyelin		Sphingoid base d18:0		SM(d18:0/22:0)		HMDB12091	SM	SM	350013		0.109354	0.0419483	0.187599	1.71552		0.0311446	0.00955301	0.0302093	0.969969		0.271717	0.0432397	0.193374	0.711672		0.154903	0.028185	0.089129	0.575385			3.51117	1.81195	0.083445		1.75411	0.810739	0.0315884
SphLip_10	Sphingolipids	Sphingomyelin		Sphingoid base d18:1		SM(d18:1/16:0)		HMDB10169	SM	SM	350015		13.7833	4.89705	21.9003	1.5889		3.79684	0.957453	3.02773	0.797434		3.17782	0.440378	1.96943	0.619742		1.79071	0.256082	0.809802	0.452224			3.6302	1.86005	0.0588196		1.77462	0.827508	0.0111213
SphLip_12	Sphingolipids	Sphingomyelin		Sphingoid base d18:1		SM(d18:1/17:0)			SM	SM	350016		0.283906	0.0834973	0.373411	1.31526		0.0883519	0.0217668	0.0688327	0.779074		0.465959	0.0592888	0.265147	0.569036		0.274739	0.0378156	0.119583	0.435261			3.21335	1.68408	0.0338811		1.696	0.76214	0.0111339
SphLip_13	Sphingolipids	Sphingomyelin		Sphingoid base d18:1		SM(d18:1/18:0)		HMDB01348	SM	SM	350017		13.0242	3.38008	15.1162	1.16062		5.62035	1.74198	5.50862	0.98012		3.22002	0.373862	1.67196	0.519241		2.0638	0.388884	1.22976	0.59587			2.31733	1.21246	0.0622018		1.56023	0.641763	0.0632946
SphLip_14	Sphingolipids	Sphingomyelin		Mixed sphingoid base		SM(36:2)	SM(d18:1/18:1) + SM(d18:2/18:0)		SM	SM	350018		2.05338	0.57778	2.58391	1.25837		0.724408	0.210469	0.665562	0.918767		1.27666	0.149298	0.667683	0.522991		0.764697	0.124564	0.393907	0.515115			2.83456	1.50313	0.041097		1.6695	0.739418	0.0341767
SphLip_16	Sphingolipids	Sphingomyelin		Mixed sphingoid base		SM(38:1)	SM(d18:1/20:0) + SM(16:1/22:0)		SM	SM	350019		1.97256	0.487241	2.17901	1.10466		0.808908	0.206735	0.653754	0.808193		1.26054	0.142086	0.635429	0.504091		0.803379	0.13478	0.42621	0.530522			2.43854	1.28602	0.0374801		1.56905	0.649894	0.0501002
SphLip_19	Sphingolipids	Sphingomyelin		Mixed sphingoid base		SM(39:1)	SM(d18:1/21:0) + SM(d17:1/22:0) + SM(d16:1/23:0) + SM(d19:1/20:0)		SM	SM	350020		0.286815	0.0795472	0.355746	1.24033		0.0718581	0.0202026	0.0638864	0.889063		0.469962	0.058916	0.26348	0.560641		0.242124	0.0383461	0.121261	0.500821			3.99141	1.9969	0.0159014		1.94099	0.956796	0.00307408
SphLip_20	Sphingolipids	Sphingomyelin		Sphingoid base d18:1		SM(d18:1/22:0)		HMDB12103	SM	SM	350021		3.85684	1.28661	5.7539	1.49187		1.14023	0.309909	0.980017	0.859487		1.69513	0.227499	1.01741	0.600193		0.957458	0.157589	0.49834	0.520483			3.3825	1.75809	0.0526956		1.77045	0.824118	0.0126181
SphLip_23	Sphingolipids	Sphingomyelin		Sphingoid base d18:1		SM(d18:1/23:0)		HMDB12105	SM	SM	350022		0.754184	0.266516	1.19189	1.58038		0.170135	0.0493895	0.156183	0.917995		0.729455	0.108113	0.483495	0.662816		0.377579	0.0553467	0.175022	0.463537			4.43285	2.14823	0.0433765		1.93193	0.950041	0.00747212
SphLip_26_SphLip_27	Sphingolipids	Sphingomyelin		Mixed sphingoid base		SM(d18:1/24:1) + SM(d18:2/24:0)			SM	SM	350026		7.49808	2.55618	11.4316	1.5246		2.54678	0.63432	2.00589	0.78762		2.36921	0.314969	1.40859	0.594537		1.47012	0.206973	0.654505	0.445207			2.94414	1.55785	0.0738977		1.61158	0.688479	0.02407
SphLip_11	Sphingolipids	Sphingomyelin		Sphingoid base d18:2		SM(d18:2/16:0)			SM	SM	350029		0.48967	0.136812	0.61184	1.2495		0.118104	0.0350844	0.110947	0.939398		0.613639	0.0771594	0.345067	0.56233		0.314662	0.0460575	0.145647	0.462867			4.14609	2.05175	0.0154821		1.95015	0.963584	0.00249598
SphLip_17	Sphingolipids	Sphingomyelin		Sphingoid base d18:2		SM(d18:2/20:0)			SM	SM	350030		0.654507	0.165276	0.739135	1.1293		0.160952	0.0566242	0.179061	1.11251		0.722707	0.0834147	0.373042	0.516173		0.342855	0.0694447	0.219603	0.640514			4.06646	2.02377	0.00958775		2.10791	1.07581	0.00622976
SphLip_22	Sphingolipids	Sphingomyelin		Sphingoid base d18:2		SM(d18:2/22:0)			SM	SM	350031		1.9223	0.552402	2.47042	1.28513		0.462762	0.146229	0.462418	0.999257		1.22722	0.148012	0.66193	0.539376		0.611363	0.0994414	0.314461	0.514361			4.15398	2.05449	0.0182621		2.00734	1.00529	0.00177843
SphLip_25	Sphingolipids	Sphingomyelin		Sphingoid base d18:2		SM(d18:2/23:0)			SM	SM	350032		0.441626	0.142905	0.639089	1.44713		0.103198	0.0306714	0.0969914	0.939861		0.571339	0.0778656	0.348226	0.609491		0.293181	0.0437699	0.138413	0.472105			4.27942	2.09742	0.0309431		1.94875	0.962553	0.00431703
CHEMICAL CLASSES
																UNTRANSFORMED DATA										SQRT TRANSFORMED DATA									UNTRANSFORMED DATA				SQRT TRANSFORMED DATA
COD.OWL	Class	Subclass A	Subclass B	Subclass C	Common name or function	Individual notation	Individual composition or probable ID	Link	Simplified name	Simple name					Parkinsonism					Control					Parkinsonism					Control					Parkinsonism vs. Control				Parkinsonism vs. Control
GROUPS													Mean	SEM	SD	Coefficient of Variation		Mean	SEM	SD	Coefficient of Variation		Mean	SEM	SD	Coefficient of Variation		Mean	SEM	SD	Coefficient of Variation			fold change	log2(fold change)	Student's t-test (p)		fold change	log2(fold change)	Student's t-test (p)
AC	Acylcarnitines					Acylcarnitines							17.4202	2.29907	10.2818	0.590222		25.4122	9.78541	30.9442	1.21769		6.25711	0.591643	2.64591	0.422864		6.79408	1.34518	4.25384	0.626109			0.685505	-0.544762	0.445017		0.920965	-0.118782	0.672994
BAs_total	Bile Acids					Bile Acids							43.9855	16.3825	73.2646	1.66566		38.1098	18.5634	58.7027	1.54036		11.5877	2.04982	9.16708	0.791104		10.9489	2.44907	7.74463	0.707346			1.15418	0.206863	0.827375		1.05835	0.0818136	0.851587
Cer	Sphingolipids				Hepatic fatty acid uptake is regulated by the sphingolipid acyl chain length. Biochim Biophys Acta. 2014 Dec;1841(12):1754-66.	Ceramides							14.2574	6.37204	28.4966	1.99872		2.86772	1.51869	4.80252	1.67468		8.4152	1.74478	7.80288	0.927237		3.71756	1.10929	3.5079	0.943602			4.97169	2.31374	0.096667		2.26363	1.17864	0.0310013
Cer_PC	Ceramides and PC				Cer and PC								206.898	29.9212	133.811	0.646752		98.6159	29.0252	91.7857	0.930739		64.5861	4.8459	21.6715	0.335545		41.4572	6.8996	21.8184	0.526289			2.09802	1.06903	0.0295226		1.5579	0.639602	0.0103319
ChoE	Sterols					Cholesteryl Esters							0.374704	0.159958	0.715356	1.90912		0.0658292	0.0189821	0.0600267	0.911856		0.961888	0.162142	0.725122	0.753853		0.446835	0.0737667	0.233271	0.522051			5.69206	2.50895	0.0699164		2.15267	1.10613	0.00775625
ChoE_LPC	ChoE and LPC				ChoE and LPC								556.256	102.621	458.936	0.825045		435.575	62.4725	197.555	0.453551		75.1395	4.34405	19.4272	0.258548		68.8876	5.68353	17.9729	0.260902			1.27706	0.35283	0.323843		1.09075	0.125327	0.40207
Chol_PC	Cho01 and PC				UC and PC								192.64	29.3549	131.279	0.681472		95.7482	28.0841	88.8096	0.927533		56.1709	4.1753	18.6725	0.332423		37.7396	6.0735	19.2061	0.508911			2.01195	1.00859	0.0451277		1.48838	0.573743	0.0175053
DAG	Glycerolipids				Promote curvature elastic stress in membranes. Proc Natl Acad Sci U S A. 2000 Aug 1;97(16):9032-6.	Diacylglycerols							4.10064	1.26678	5.66521	1.38154		0.696111	0.332735	1.0522	1.51154		4.17969	0.594538	2.65885	0.636136		1.6434	0.393432	1.24414	0.757054			5.89078	2.55846	0.0165504		2.54332	1.34671	0.00135858
DAPC	Glycerophospholipids					Diacylglycerophosphocholine							184.056	28.208	126.15	0.685389		91.9134	27.0279	85.4696	0.929893		45.7423	3.41191	15.2585	0.333575		31.0624	5.01466	15.8577	0.510513			2.0025	1.0018	0.0472958		1.4726	0.558363	0.020668
DAPE	Glycerophospholipids					Diacylglycerophosphoethanolamine							2.3792	0.435672	1.94838	0.818924		1.56139	0.373161	1.18004	0.75576		2.85939	0.286493	1.28124	0.44808		2.35256	0.328151	1.0377	0.441096			1.52377	0.607643	0.234756		1.21544	0.28148	0.288035
FAA	Fatty amides					Primary fatty amides							4.0313	1.32941	5.9453	1.47478		0.466686	0.223412	0.706491	1.51385		3.75279	0.635685	2.84287	0.757536		1.26525	0.335136	1.05979	0.837614			8.63816	3.11072	0.0155365		2.96604	1.56854	0.00182381
FBA	Bile Acids					Free bile acids							16.4707	7.59443	33.9633	2.06205		25.9103	18.2106	57.587	2.22255		5.11681	0.993052	4.44107	0.867936		5.82262	2.15467	6.81365	1.1702			0.63568	-0.653628	0.575322		0.878782	-0.186423	0.73451
FFA.16.1	Non-esterified fatty acids				FFA with 16:1 FA chains								19.2355	3.2356	14.47	0.752256		9.03618	1.90931	6.03777	0.668177		5.56437	0.410242	1.83466	0.329716		3.91463	0.418222	1.32253	0.337844			2.12872	1.08999	0.0113199		1.42143	0.50734	0.0175213
FFA.18.1	Non-esterified fatty acids				FFA with 18:1 FA chains								233.468	19.455	87.0053	0.372665		179.261	31.2297	98.7571	0.550914		17.2802	0.688547	3.07928	0.178196		14.5634	1.28148	4.05239	0.278258			1.30239	0.381167	0.135048		1.18655	0.246774	0.0498662
FFA.18.2	Non-esterified fatty acids				FFA with 18:2 FA chains								83.8507	22.4327	100.322	1.19644		58.5285	12.6408	39.9738	0.682981		10.0765	0.876407	3.91941	0.388967		8.45213	0.902638	2.85439	0.337713			1.43265	0.518684	0.33407		1.19218	0.2536	0.255331
GCBA	Bile Acids					Glycine-conjugated bile acids							27.5148	12.3056	55.0325	2.00011		12.1995	3.6838	11.6492	0.95489		6.47089	1.35177	6.04531	0.934233		5.12624	0.950257	3.00498	0.586195			2.2554	1.17338	0.245745		1.26231	0.336062	0.422643
Lipids	All the lipids					PC+PE+LPC+LPE+PI+LPI+PS+PG+LPG+DAG+TAG+NEFA+SL							2136.36	157.552	704.592	0.32981		1744.67	247.47	782.568	0.448548		377.018	12.5827	56.2714	0.149254		309.68	24.4886	77.4398	0.250064			1.22451	0.292203	0.17719		1.21745	0.283857	0.0110034
LPC	Glycerophospholipids					Lysophosphatidylcholines							555.882	102.595	458.819	0.825389		435.509	62.4666	197.537	0.453577		74.1776	4.32189	19.3281	0.260565		68.4408	5.64515	17.8515	0.260832			1.2764	0.352076	0.32496		1.08382	0.116127	0.438968
LPE	Glycerophospholipids					Lysophosphatidylethanolamines							814.113	55.0184	246.05	0.30223		850.868	134.676	425.882	0.500527		112.588	3.87412	17.3256	0.153885		113.08	10.3968	32.8777	0.290746			0.956804	-0.0637052	0.804788		0.995645	-0.00629616	0.965357
LPI	Glycerophospholipids					Lysophosphatidylinositols							83.3952	9.08554	40.6318	0.48722		106.339	11.206	35.4363	0.33324		16.1858	0.932303	4.16939	0.257596		18.4069	1.04005	3.28893	0.178679			0.784239	-0.350634	0.140342		0.879333	-0.185519	0.1534
MAG	Glycerolipids					Total Monoacylglycerols							0.579329	0.188238	0.841826	1.4531		0.0870913	0.0439501	0.138983	1.59583		0.852289	0.141649	0.633474	0.743262		0.320011	0.0831439	0.262924	0.821608			6.65198	2.73378	0.0187881		2.66331	1.41322	0.0031176
MAPC_total	Glycerophospholipids					Monoacylglycerophosphocholine							529.968	101.764	455.103	0.858736		408.027	59.127	186.976	0.458244		66.0403	4.15938	18.6013	0.281666		60.2502	5.14577	16.2724	0.27008			1.29885	0.377239	0.309223		1.0961	0.132382	0.41031
MAPE_total	Glycerophospholipids					Monoacylglycerophosphoethanolamine							670.341	49.3688	220.784	0.329361		696.508	112.705	356.404	0.511701		93.5676	3.52901	15.7822	0.168672		93.6974	8.96122	28.3379	0.30244			0.962432	-0.0552436	0.805547		0.998615	-0.00200014	0.98947
MAPI	Glycerophospholipids					Monoacylglycerophosphoinositol							83.3952	9.08554	40.6318	0.48722		106.339	11.206	35.4363	0.33324		16.1858	0.932303	4.16939	0.257596		18.4069	1.04005	3.28893	0.178679			0.784239	-0.350634	0.140342		0.879333	-0.185519	0.1534
MEMAPC	Glycerophospholipids					1-ether, 2-acylglycerophosphocholines							8.58387	1.31574	5.88419	0.685493		3.83482	1.07056	3.38541	0.88281		10.4285	0.816611	3.65199	0.350192		6.67724	1.0748	3.39881	0.509014			2.2384	1.16247	0.0259333		1.5618	0.643214	0.0113241
MEMAPC.O_plasmanyles	Glycerophospholipids					1-ether, 2-acylglycerophosphocholines O_plasmanyles							3.42379	0.549097	2.45564	0.717227		1.56673	0.429464	1.35808	0.866829		4.98896	0.40239	1.79954	0.360705		3.23223	0.515782	1.63105	0.504619			2.18531	1.12784	0.0350418		1.5435	0.626209	0.0148493
MEMAPC.P_plasmenyles	Glycerophospholipids					1-ether, 2-acylglycerophosphocholines P_plasmenyles							5.16008	0.789334	3.53001	0.6841		2.26809	0.645171	2.04021	0.899528		5.43959	0.423675	1.89473	0.348323		3.44501	0.561968	1.7771	0.515847			2.27508	1.18592	0.0240321		1.57898	0.658988	0.00978843
MEMAPE	Glycerophospholipids					1-ether, 2-acylglycerophosphoethanolamine							3.45719	0.649577	2.905	0.840278		1.95749	0.539109	1.70481	0.870916		4.09175	0.409018	1.82919	0.447042		3.04681	0.483098	1.52769	0.501406			1.76613	0.820592	0.144711		1.34296	0.425418	0.131802
MEMAPE.O_plasmanyles	Glycerophospholipids					1-ether, 2-acylglycerophosphoethanolamine O_plasmanyles							0.651065	0.157552	0.686753	1.05482		0.371041	0.113735	0.35966	0.969328		0.730181	0.0809323	0.352776	0.483135		0.543156	0.091907	0.290635	0.535086			1.7547	0.811223	0.241059		1.34433	0.426887	0.16247
MEMAPE.P_plasmenyles	Glycerophospholipids					1-ether, 2-acylglycerophosphoethanolamine P_plasmenyles							2.5105	0.440863	1.9716	0.785343		1.40349	0.394558	1.2477	0.888999		2.68575	0.24973	1.11683	0.415834		1.96375	0.314009	0.992985	0.505656			1.78875	0.838952	0.117852		1.36766	0.45171	0.0949347
Membrane.Lipids	Glycerophospholipids + Diacylglycerols					PC+PE+LPC+LPE+PI+LPI+PS+PG+LPG(+DAG)							1716.57	135.563	606.257	0.353179		1510.82	196.517	621.441	0.411327		299.229	10.9034	48.7613	0.162956		260.271	20.4338	64.6172	0.248269			1.13619	0.1842	0.392114		1.14968	0.201237	0.0748512
MEPC.O_plasmanyles	Glycerophospholipids					1-Monoetherglycerophosphocholine O_plasmanyles							7.13294	0.705191	3.15371	0.442133		8.53721	1.79503	5.67639	0.6649		2.60011	0.139996	0.626082	0.240791		2.77026	0.309638	0.97916	0.353455			0.835511	-0.259268	0.480661		0.938579	-0.0914493	0.56669
MEPC.P_plasmenyles	Glycerophospholipids					1-Monoetherglycerophosphocholine P_plasmenyles							18.7812	1.67169	7.47602	0.398059		18.9446	3.79872	12.0126	0.634089		5.53718	0.289438	1.2944	0.233766		5.42035	0.535696	1.69402	0.31253			0.99137	-0.0125043	0.963658		1.02155	0.0307663	0.835025
MEPE.O_plasmanyles	Glycerophospholipids					1-Monoetherglycerophosphoethanolamine O_plasmanyles							8.40423	0.913587	4.08568	0.486146		8.54163	1.2826	4.05595	0.474845		2.82185	0.152419	0.681638	0.241557		2.84262	0.226357	0.715804	0.251811			0.983913	-0.0233969	0.93126		0.992692	-0.0105814	0.938842
MEPE.P_plasmenyles	Glycerophospholipids					1-Monoetherglycerophosphoethanolamine P_plasmenyles							135.368	9.55927	42.7504	0.315809		145.818	22.2354	70.3144	0.482205		16.1985	0.596593	2.66804	0.16471		16.5403	1.32945	4.2041	0.254173			0.928332	-0.107287	0.615929		0.979333	-0.0301289	0.787437
MUFA	Non-esterified fatty acids					Monounsaturated fatty acids							254.824	21.6021	96.6075	0.379115		189.112	33.211	105.022	0.555345		24.143	1.07253	4.79649	0.19867		19.3189	1.78763	5.653	0.292615			1.34748	0.430262	0.0988723		1.24971	0.321591	0.0208781
NAE	Fatty amides					N-Acyl ethanolamines							50.3495	6.21037	27.7736	0.551617		31.0254	6.81061	21.537	0.694174		10.6378	0.69642	3.11448	0.292776		8.40624	0.926505	2.92987	0.348534			1.62285	0.698526	0.0645777		1.26546	0.339666	0.0698204
NEFA_omega_3	Non-esterified fatty acids					NEFA omega 3							206.567	20.1835	90.2635	0.436969		172.25	19.5833	61.9277	0.359522		21.1116	1.03593	4.63284	0.219445		19.3943	1.02711	3.248	0.167472			1.19923	0.262105	0.290421		1.08855	0.122404	0.304315
NEFA_omega_6	Non-esterified fatty acids					NEFA omega 6							457.962	46.1801	206.524	0.450963		333.001	40.923	129.41	0.388617		37.4005	1.82006	8.13954	0.217632		31.3845	1.99864	6.32027	0.201382			1.37526	0.4597	0.0925768		1.19169	0.253007	0.0505441
NEFA_omega_9	Non-esterified fatty acids					NEFA omega 9							234.917	20.0799	89.7999	0.382263		181.107	31.3187	99.0385	0.546849		18.5124	0.785184	3.51145	0.189681		15.6983	1.32973	4.20496	0.267861			1.29711	0.375304	0.145835		1.17926	0.237879	0.0627169
NEFA_total	Non-esterified fatty acids					Non-esterified fatty acids							2126.05	145.957	652.737	0.307019		1447.54	287.917	910.474	0.628982		144.061	4.88217	21.8337	0.151558		115.298	10.265	32.4609	0.281538			1.46874	0.554575	0.0260293		1.24946	0.32131	0.00743216
PC	Glycerophospholipids					Phosphatidylcholines							192.64	29.3549	131.279	0.681472		95.7482	28.0841	88.8096	0.927533		56.1709	4.1753	18.6725	0.332423		37.7396	6.0735	19.2061	0.508911			2.01195	1.00859	0.0451277		1.48838	0.573743	0.0175053
PC.DHA	Glycerophospholipids				PC with 22:6 FA	PC-DHA							2.81011	0.386009	1.72629	0.614313		1.7478	0.326825	1.03351	0.591323		2.99392	0.235815	1.0546	0.352246		2.30324	0.269174	0.851204	0.369568			1.6078	0.685087	0.0853702		1.29987	0.378371	0.083537
PC_20.4	Glycerophospholipids				PC with 20:4 FA(arachidonic acid)	PC 20:4							23.0859	3.04984	13.6393	0.590807		10.9384	2.8213	8.92174	0.815632		12.1783	0.908175	4.06148	0.333502		7.92109	1.22677	3.87938	0.489753			2.11053	1.07761	0.0167035		1.53745	0.620539	0.0104379
PC_PEMT	Glycerophospholipids				Glycerophospholipids potentially derived from PE methylation	PE PEMT							122.5	19.6862	88.0394	0.718688		59.0803	18.2362	57.6681	0.976096		22.2357	1.66616	7.45128	0.335105		15.0029	2.41518	7.63747	0.509067			2.07345	1.05203	0.048967		1.48209	0.567635	0.01915
PE	Glycerophospholipids					Phosphatidylethanolamines							5.83639	1.08095	4.83417	0.828281		3.51889	0.901201	2.84985	0.809872		6.95115	0.692631	3.09754	0.445616		5.39937	0.807647	2.554	0.473019			1.65859	0.729957	0.174763		1.2874	0.36446	0.182911
PE.DHA	Glycerophospholipids				PE with 22:6 FA	PE-DHA							0.842236	0.16012	0.716076	0.850209		0.524773	0.131095	0.414559	0.789978		1.41606	0.139508	0.623898	0.440588		1.12113	0.162911	0.515168	0.459507			1.60495	0.68253	0.207295		1.26306	0.336924	0.208224
PE_20.4	Glycerophospholipids				PE with 20:4 FA (arachidonic acid)	PE 20:4							3.34302	0.561418	2.51074	0.751038		2.0879	0.542307	1.71493	0.821365		3.24163	0.316757	1.41658	0.436996		2.52715	0.38489	1.21713	0.481621			1.60114	0.679104	0.167215		1.28272	0.359207	0.184437
PE_PEMT	Glycerophospholipids				Glycerophospholipids susceptible of methylation	PC PEMT							5.08217	0.911277	4.07535	0.801892		3.06825	0.782423	2.47424	0.806399		5.92876	0.577131	2.58101	0.435337		4.5999	0.685168	2.16669	0.47103			1.65637	0.728028	0.164014		1.28889	0.366127	0.17329
PUFA	Non-esterified fatty acids				Inhibit SDC1 and SREBP1c gene expression	Polyunsaturated fatty acids							672.109	63.3237	283.192	0.421349		510.402	59.718	188.845	0.369993		61.9644	2.88639	12.9083	0.208319		53.6805	3.12744	9.88983	0.184235			1.31682	0.397061	0.115012		1.15432	0.207041	0.0860515
Sat.DAG	Glycerolipids					Saturated Diacylglycerols							2.10192	0.606385	2.71183	1.29017		0.336022	0.194568	0.615279	1.83107		1.72709	0.251549	1.12496	0.651362		0.611974	0.181385	0.573589	0.937276			6.25532	2.64508	0.010926		2.82216	1.4968	0.00123052
Sat.TAG	Glycerolipids					Saturated Triacylglycerols							2.45681	0.698266	3.12274	1.27106		0.400766	0.099369	0.314232	0.78408		3.71052	0.494326	2.21069	0.595791		1.59514	0.195131	0.617059	0.386837			6.13028	2.61595	0.00863285		2.32614	1.21794	0.00054864
SFA	Non-esterified fatty acids					Saturated fatty acids							1199.11	118.132	528.303	0.440577		748.022	215.255	680.697	0.909995		57.954	2.9342	13.1221	0.226423		42.2991	6.06142	19.1679	0.453152			1.60305	0.680817	0.0550109		1.3701	0.454282	0.0134908
SL	Sphingolipids					Cer+SM+CHM+FSB							60.6038	20.1268	90.0096	1.48521		18.1395	4.92651	15.579	0.858845		28.9763	4.24028	18.9631	0.654437		15.5605	2.63999	8.34839	0.53651			3.34099	1.74028	0.0530139		1.86216	0.896979	0.0120681
SM	Sphingolipids					Sphingomyelins							46.3463	14.3493	64.172	1.38462		15.2717	4.09707	12.9561	0.848368		20.5611	2.59448	11.6029	0.564312		11.843	1.8131	5.73352	0.484128			3.03478	1.60159	0.0491932		1.73614	0.795882	0.0102171
SM_DAG	SM and DAG				SM and DAG								50.447	15.1532	67.7672	1.34333		15.9679	4.37996	13.8506	0.867407		24.7408	3.08449	13.7942	0.557552		13.4864	2.15491	6.81442	0.505281			3.15928	1.6596	0.0397613		1.8345	0.875386	0.00574365
ST	Sterols					Steroids							295.532	46.4672	207.808	0.703165		163.339	67.9903	215.004	1.31631		21.9679	1.58265	7.07782	0.322189		13.6219	2.69366	8.5181	0.625326			1.80932	0.855447	0.11554		1.6127	0.689475	0.00818342
Storage.Lipids	Triacylglycerols + Cholesteryl Esters					TAG+ChoE							52.4579	14.2144	63.5685	1.2118		13.6075	2.73504	8.64895	0.635602		35.1733	4.03515	18.0458	0.513052		19.3215	1.86834	5.90822	0.305785			3.85508	1.94676	0.0141251		1.82043	0.864277	0.00146562
TAG	Glycerolipids					Triacylglycerols							52.0832	14.186	63.4419	1.21809		13.5417	2.72743	8.6249	0.636916		34.2115	3.96182	17.7178	0.51789		18.8747	1.84173	5.82407	0.308566			3.84615	1.94341	0.0146287		1.81256	0.85803	0.00167993
UFA	Non-esterified fatty acids				MUFA+PUFA	Unsaturated fatty acids. UFA and short FA lead to higher membrane fluidity.							926.933	72.8319	325.714	0.351389		699.514	89.4643	282.911	0.404439		86.1074	3.38513	15.1388	0.175813		72.9994	4.69123	14.835	0.20322			1.32511	0.406113	0.0707697		1.17956	0.238252	0.0324905
X1.MAPC	Glycerophospholipids					1-Monoacylglycerophosphocholine							395.852	92.4407	413.408	1.04435		274.508	41.4528	131.085	0.477529		42.4906	3.27341	14.6392	0.344527		37.0522	3.2979	10.4289	0.281464			1.44204	0.528114	0.242133		1.14678	0.197583	0.304729
X1.MAPE	Glycerophospholipids					1-Monoacylglycerophosphoethanolamine							423.382	33.6087	150.303	0.355005		445.744	73.9864	233.966	0.524887		48.2583	1.95012	8.72121	0.180719		48.8233	4.85621	15.3567	0.314536			0.949832	-0.0742564	0.752689		0.988429	-0.016791	0.915817
X1.MEPC	Glycerophospholipids					1-Monoetherglycerophosphocholine							25.9141	2.19757	9.82782	0.379246		27.4819	5.50957	17.4228	0.633974		8.13729	0.399348	1.78594	0.219476		8.19061	0.83214	2.63146	0.321277			0.942953	-0.0847426	0.796049		0.99349	-0.0094221	0.948081
X1.MEPE	Glycerophospholipids					1-Monoetherglycerophosphoethanolamine							143.772	10.2583	45.8766	0.319093		154.36	23.3442	73.8207	0.478237		19.0203	0.724812	3.24146	0.170421		19.3829	1.53324	4.84853	0.250144			0.931408	-0.102515	0.631587		0.981292	-0.0272455	0.808769
X2.MAPC	Glycerophospholipids					2-Monoacylglycerophosphocholine							134.116	14.5001	64.8462	0.48351		133.519	21.6304	68.4012	0.512295		23.5497	1.35494	6.05946	0.257305		23.1979	2.09237	6.61665	0.285226			1.00447	0.00642951	0.981555		1.01516	0.0217123	0.885389
X2.MAPE	Glycerophospholipids					2-Monoacylglycerophosphoethanolamine							219.99	17.9474	80.2632	0.364849		223.253	40.0843	126.758	0.567776		33.4595	1.30169	5.82135	0.173982		33.2982	3.207	10.1414	0.304564			0.985384	-0.0212419	0.931861		1.00485	0.00697431	0.963579
RATIOS
																UNTRANSFORMED DATA										SQRT TRANSFORMED DATA									UNTRANSFORMED DATA				SQRT TRANSFORMED DATA
COD.OWL	Class	Subclass A	Subclass B	Subclass C	Common name or function	Individual notation	Individual composition or probable ID	Link	Simplified name	Simple name					Parkinsonism					Control					Parkinsonism					Control					Parkinsonism vs. Control				Parkinsonism vs. Control
GROUPS													Mean	SEM	SD	Coefficient of Variation		Mean	SEM	SD	Coefficient of Variation		Mean	SEM	SD	Coefficient of Variation		Mean	SEM	SD	Coefficient of Variation			fold change	log2(fold change)	Student's t-test (p)		fold change	log2(fold change)	Student's t-test (p)
ratio SM_DG/Cer_PC	SM+DG / Cer+PC				SMS. Sphingomyelin synthase.								0.237172	0.0533106	0.238412	1.00523		0.190448	0.0159218	0.0503493	0.264373		0.37433	0.0272472	0.121853	0.325523		0.33469	0.0117067	0.0370197	0.110609			1.24534	0.31654	0.409986		1.11844	0.161485	0.193427
ratio_1-MEPC/1-MEPE	1-MEPC / 1-MEPE					1-MEPC / 1-MEPE							0.187091	0.014896	0.0666169	0.356067		0.186522	0.0304388	0.096256	0.516057		0.431504	0.0189119	0.0845767	0.196004		0.42708	0.0334008	0.105622	0.247313			1.00305	0.0043915	0.984999		1.01036	0.0148693	0.901926
ratio_Cer/SM	Cer / SM				ASM. Acid sphingomyelinase.	Cer / SM							0.204292	0.0403696	0.180538	0.883729		0.168077	0.0967165	0.305844	1.81967		0.366934	0.0334308	0.149507	0.40745		0.287903	0.0709329	0.22431	0.779116			1.21546	0.281506	0.685416		1.27451	0.34994	0.258794
ratio_DAPC/DAPE	DAPC / DAPE					DAPC / DAPE							233.565	150.167	671.566	2.87529		54.6144	10.3649	32.7767	0.600147		20.6143	4.93101	22.0521	1.06975		12.9338	0.889273	2.81213	0.217425			4.27662	2.09647	0.24901		1.59383	0.672498	0.140814
ratio_FFA (16:0/18:2n-6)	16:0/18:2n-6				Lipogenic index. J Clin Invest. 1996 May 1;97(9):2081-91.	16:0/18:2n-6							13.7196	1.83671	8.21401	0.598706		7.96736	1.56178	4.93878	0.619876		3.5166	0.266864	1.19345	0.339376		2.68481	0.290434	0.918432	0.342085			1.72198	0.784065	0.0521473		1.30982	0.389364	0.0637267
ratio_FFA (16:1n-7/16:0)	16:1n-7/16:0				SCD (n-7). Stearoyl-CoA Desaturase activity-16C. Reduced by starvation or unsaturated fat feeding and induced by carbohydrate feeding.	16:1n-7/16:0							0.0144243	0.00392543	0.0175551	1.21705		0.0312997	0.0203723	0.0644227	2.05826		0.105028	0.013364	0.0597655	0.569042		0.137294	0.0371933	0.117616	0.856671			0.460844	-1.11765	0.435556		0.76499	-0.386488	0.431021
ratio_FFA (18:0/16:0)	18:0/16:0				LCE. Long-chain elongase	18:0/16:0							0.726545	0.0204592	0.0914964	0.125934		0.716249	0.0370404	0.117132	0.163535		0.850751	0.0120705	0.0539809	0.063451		0.8434	0.0233919	0.0739716	0.0877064			1.01438	0.0205912	0.79322		1.00872	0.0125187	0.758487
ratio_FFA (18:1n-9/18:0)	18:1n-9/18:0				SCD (n-9). Stearoyl-CoA Desaturase activity-18C. Reduced by starvation or unsaturated fat feeding and induced by carbohydrate feeding.	18:1n-9/18:0							0.531011	0.0596316	0.266681	0.502213		1.11528	0.489541	1.54806	1.38805		0.708419	0.0391719	0.175182	0.247286		0.939827	0.160556	0.507723	0.54023			0.476124	-1.07059	0.265609		0.753776	-0.407793	0.191448
ratio_FFA (22:4n-6/20:4n-6)													0.113356	0.00880908	0.0393954	0.347538		0.0976578	0.00920331	0.0291034	0.298014		0.332505	0.0121319	0.0542554	0.163172		0.309474	0.0144673	0.0457497	0.147831			1.16075	0.215052	0.27503		1.07442	0.103557	0.259559
ratio_FFA (22:5n-3/20:5n-3)	22:5n-3/20:5n-3				ELOVL5,2, reduction, dehydration, reduction_2								1.52156	0.0851143	0.380643	0.250166		1.38674	0.123501	0.390544	0.281628		1.22365	0.0357127	0.159712	0.130521		1.16717	0.0521132	0.164797	0.141193			1.09722	0.133859	0.372198		1.04839	0.0681764	0.373841
ratio_FFA (22:5n-6/22:4n-6)													0.554228	0.0317787	0.142119	0.256426		0.440059	0.0305697	0.0966697	0.219674		0.738524	0.0215345	0.0963052	0.130402		0.660007	0.0222353	0.0703142	0.106535			1.25944	0.332783	0.0303933		1.11896	0.162162	0.0301991
ratio_FFA (22:6n-3/22:5n-3)	22:6n-3/22:5n-3				FADS2 D4_n-3								21.0989	2.23689	10.0037	0.474133		22.2106	3.83812	12.1372	0.54646		4.47478	0.237884	1.06385	0.237743		4.52572	0.438231	1.38581	0.306207			0.949946	-0.0740826	0.79114		0.988744	-0.016331	0.911817
ratio_index_FFA 16:1/(16:1_16:0)	FFA 16:1/Denom_SCD_C16				SCD Fatty acid ratio. Stearoyl-CoA Desaturase activity-16C. Reduced by starvation or unsaturated fat feeding and induced by carbohydrate feeding. doi:10.1038/oby.2009.326	16:1/(16:1+16:0)							0.0283593	0.00361877	0.0161836	0.570663		0.036452	0.01653	0.0522724	1.434		0.180051	0.00824458	0.0368709	0.20478		0.184713	0.020887	0.0660505	0.357585			0.77799	-0.362176	0.642886		0.974761	-0.0368796	0.839047
ratio_index_FFA 18:1/(18:1_18:0)	FFA 18:1/Denom_SCD_C18				SCD Fatty acid ratio. Stearoyl-CoA Desaturase activity-18C. Reduced by starvation or unsaturated fat feeding and induced by carbohydrate feeding. doi:10.1038/oby.2009.326	18:1/(18:1+18:0)							0.337675	0.0224722	0.100499	0.29762		0.428887	0.0521104	0.164788	0.384221		0.449072	0.0109558	0.0489959	0.109105		0.494015	0.0288607	0.0912655	0.184743			0.787327	-0.344965	0.0696124		0.909025	-0.137609	0.171807
ratio_LPC/LPE	LPC / LPE					LPC / LPE							0.76997	0.201437	0.900853	1.16998		0.543487	0.0563359	0.17815	0.32779		0.668926	0.0466934	0.208819	0.312171		0.616716	0.0282994	0.0894904	0.145108			1.41672	0.502558	0.290729		1.08466	0.117241	0.347241
ratio_LPC/PC	LPC /PC				PLA2. Phospholipase A2 activity. It is an indicator of the severity of rheumatoid arthritis in human plasma. Clin Biochem. 2005 Oct;38(10):925-33.	LPC / PC							4.30167	0.937236	4.19145	0.974377		13.1598	4.25859	13.4668	1.02333		1.46244	0.13622	0.609194	0.41656		2.35573	0.425729	1.34627	0.571489			0.32688	-1.61317	0.0699724		0.620801	-0.687797	0.0712697
ratio_LPE/PE	LPE / PE				PLA2. Phospholipase A2 activity	LPE / PE							318.918	88.6245	396.341	1.24277		516.466	165.214	522.452	1.01159		20.6797	2.93017	13.1041	0.633671		25.6093	4.20849	13.3084	0.519671			0.617501	-0.695486	0.257024		0.807506	-0.308455	0.342093
ratio_MAPC/MAPE	MAPC / MAPE					MAPC / MAPE							0.912866	0.253601	1.13414	1.24239		0.625605	0.0700589	0.221546	0.354131		0.718754	0.0549412	0.245705	0.341848		0.656189	0.033767	0.106781	0.162728			1.45917	0.545152	0.286857		1.09535	0.131386	0.34035
ratio_MEMAPC/MEMAPE	MEMAPC / MEMAPE					MEMAPC / MEMAPE							5.85876	3.33965	14.9354	2.54924		2.13833	0.258598	0.817759	0.38243		3.17642	0.713968	3.19296	1.00521		2.24766	0.12884	0.407427	0.181267			2.73988	1.45411	0.280398		1.41321	0.498975	0.214987
ratio_MUFA_PUFA/SFA	MUFA+PUFA / SFA				Desaturase activity. Membrane fluidity	MUFA_PUFA/SFA							0.952739	0.137875	0.616594	0.647181		1.52623	0.352152	1.1136	0.729642		1.56065	0.103729	0.463892	0.297242		1.945	0.198084	0.626397	0.322055			0.624242	-0.679824	0.155642		0.802394	-0.317617	0.0674675
ratio_NEFA_omega_6/omega_3	NEFA omega 6/omega 3				Increased is more pathogenic	NEFA omega 6/omega 3							2.29619	0.170636	0.763109	0.332337		1.93964	0.0927638	0.293345	0.151236		1.78513	0.0495711	0.221689	0.124186		1.61379	0.0451735	0.142851	0.088519			1.18382	0.243452	0.0774575		1.10617	0.145579	0.0350997
ratio_PC/PE	PC / PE					PC / PE							88.5663	54.6766	244.521	2.76088		25.7724	4.21669	13.3344	0.517388		10.2005	2.35676	10.5397	1.03325		6.96485	0.412478	1.30437	0.187279			3.43648	1.78093	0.266239		1.46458	0.550482	0.191241
ratio_PC/PE(16:0/18:1)	PC(16:0/18:1) / PE(16:0/18:1)				PE(16:0/18:1) methylation by PEMT	DAPC07/DAPE02							603.986	410.166	1834.32	3.03702		103.899	25.1126	79.4132	0.764329		16.8587	4.10244	18.3467	1.08826		9.59886	1.14314	3.61494	0.376601			5.8132	2.53933	0.238415		1.75632	0.812559	0.102471
ratio_PC/PE(16:0/20:4)	PC(16:0/20:4) / PE(16:0/20:4)				PE(16:0/20:4) methylation by PEMT	DAPC14/DAPE08							34.7006	4.04876	17.6481	0.508584		27.8738	4.11505	13.0129	0.466853		5.71933	0.332483	1.44926	0.253397		5.15847	0.37476	1.18509	0.229738			1.24492	0.316051	0.291762		1.10873	0.148905	0.302901
ratio_PC/PE(16:0/22:6)	PC(16:0/22:6) / PE(16:0/22:6)				PE(16:0/22:6) methylation by PEMT	DAPC24/DAPE21							9.52414	4.7669	21.3182	2.23834		6.29596	1.86773	5.90629	0.938108		2.54395	0.400819	1.79252	0.70462		2.34218	0.300031	0.948783	0.405086			1.51274	0.597164	0.534281		1.08615	0.119221	0.742726
ratio_PC/PE(16:1e/18:2)	PC(16:1e/18:2) / PE(16:1e/18:2)				PE(16:1e/18:2) methylation by PEMT	MEMAPC09/MEMAPE02							3.20006	0.385122	1.63394	0.510596		3.55715	0.462603	1.46288	0.411251		1.73357	0.107039	0.45413	0.261962		1.8504	0.121647	0.384681	0.207891			0.899613	-0.152623	0.570777		0.936867	-0.0940844	0.498374
ratio_PC/PE(16:1e/22:6)	PC(16:1e/22:6) / PE(16:1e/22:6)				PE(16:1e/22:6) methylation by PEMT	MEMAPC29/MEMAPE11							0.236386	0.0808181	0.352278	1.49027		0.122421	0.0174549	0.0551974	0.450881		0.435998	0.0507124	0.22105	0.506998		0.340263	0.0271663	0.0859075	0.252474			1.93093	0.949293	0.183598		1.28136	0.357672	0.108293
ratio_PC/PE(18:0/20:4)	PC(18:0/20:4) / PE(18:0/20:4)				PE(18:0/20:4) methylation by PEMT	DAPC19/DAPE18							9.57992	1.40596	5.96497	0.622653		4.73885	1.14726	3.62797	0.76558		2.98089	0.202077	0.857339	0.287611		2.07156	0.222983	0.705134	0.340388			2.02157	1.01548	0.028016		1.43896	0.525028	0.00836793
ratio_PC/PE(18:1e/22:4)	PC(18:1e/22:4) / PE(18:1e/22:4)				PE(18:1e/22:4) methylation by PEMT	MEMAPC32/MEMAPE12							0.138104	0.0145736	0.0600886	0.435097		0.121975	0.0231128	0.0730891	0.599212		0.36275	0.020181	0.0832086	0.229383		0.334797	0.0331434	0.104809	0.313051			1.13223	0.179164	0.539597		1.08349	0.115689	0.450877
ratio_PC/PE_20:4	PC/PE 20:4				PC/PE with 20:4 FA (arachidonic acid)	PC/PE 20:4							16.7613	9.5965	42.9169	2.56048		5.79141	0.799168	2.52719	0.436369		4.83483	1.17546	5.2568	1.08728		3.19961	0.200353	0.633571	0.198015			2.89416	1.53314	0.268603		1.51107	0.595571	0.185391
ratio_PC/PE_PEMT	PC / PE with the same fatty acyl chains				PC/PE with the same FA chains. Related with phosphatidylethanolamine methyltransferase activity (PEMT).	PC PEMT/PE PEMT							63.8478	39.3931	176.171	2.75924		18.0968	3.23526	10.2308	0.565338		4.66254	1.02066	4.56452	0.978976		3.26952	0.211021	0.667308	0.2041			3.52813	1.8189	0.261226		1.42606	0.512037	0.195957
ratio_PC-DHA/PC	PC-DHA / PC				PEMT. Phosphatidylethanolamine methyltransferase activity marker. PC with Docosahexaenoic acid vs. total PC.	PC-DHA/PC							0.0157912	0.00122325	0.00547052	0.346429		0.0341893	0.00776401	0.024552	0.718118		0.0536476	0.00221055	0.00988587	0.184274		0.0675578	0.00518762	0.0164047	0.242825			0.461875	-1.11443	0.0426841		0.794099	-0.332609	0.00708952
ratio_PUFA/MUFA	PUFA / MUFA				Desaturase activity. Membrane fluidity. Increased in longevous females. Doi: 10.1111/acel.12064								2.97768	0.40846	1.82669	0.613459		3.11296	0.418954	1.32485	0.425591		2.63464	0.146903	0.656971	0.249359		2.89514	0.189584	0.599517	0.207077			0.956544	-0.0640966	0.836978		0.91002	-0.136029	0.301568
ratio_SM/PC	SM / PC				An increased SM to PC ratio enhances the susceptibility of LDL to secretory sphingomyelinase, which leads to Cer generation and the formation of aggregated LDL exhibiting a high atherogenic potential. In contrast, the antiatherogenic potential of HDL (i.e., the cholesterol uptake capacity) may be enhanced by an enrichment of PC and SM. J Biol Chem. 1998 Jan 30;273(5):2738-46.	SM/PC							0.279985	0.0875969	0.391745	1.39917		0.187762	0.0156464	0.0494783	0.263516		0.372384	0.0437147	0.195498	0.52499		0.32137	0.009819	0.0310504	0.096619			1.49117	0.57644	0.31227		1.15874	0.212557	0.267776
ratio_TG/DG													42.3999	19.3978	86.7498	2.04599		108.996	49.555	156.707	1.43773		10.6388	1.95605	8.7477	0.822241		18.4472	4.99335	15.7904	0.855977			0.389004	-1.36214	0.234945		0.576719	-0.794059	0.171383
